# Supplementary material for: Enzymatic β-elimination in natural product O- and C-glycoside deglycosylation
Source: Springer Nature journal article supplement (doi:10.1038/s41467-023-42750-0), 2023-11-06
Supplement: MOESM1 [file 41467_2023_42750_MOESM1_ESM.pdf]

## Supplementary Information

### Enzymatic $\beta$ -elimination in natural product *O*- and *C*-glycoside deglycosylation

**Johannes Bitter<sup>[1]</sup>, Martin Pfeiffer<sup>[1]</sup>, Annika J. E. Borg<sup>[1, 2]</sup>, Kirill Kuhlmann<sup>[3]</sup>, Tea Pavkov-Keller<sup>[3, 4, 5]</sup>, Pedro A. Sánchez-Murcia<sup>[6]</sup> and Bernd Nidetzky <sup>[1, 2]\*</sup>**

<sup>[1]</sup> Institute of Biotechnology and Biochemical Engineering, Graz University of Technology, NAWI Graz, Petersgasse 12, A-8010 Graz, Austria

<sup>[2]</sup> Austrian Centre of Industrial Biotechnology, Krenngasse 37, A-8010 Graz, Austria

<sup>[3]</sup> Institute of Molecular Biosciences, University of Graz, Humboldtstraße 50/III, A-8010 Graz, Austria

<sup>[4]</sup> BioTechMed-Graz, Mozartgasse 12/II, A-8010 Graz, Austria

<sup>[5]</sup> BioHealth Field of Excellence, University of Graz, Humboldtstraße 50, A-8010 Graz, Austria

<sup>[6]</sup> Laboratory of Computer-Aided Molecular Design, Division of Medicinal Chemistry, Otto-Loewi Research Center, Medical University of Graz, Neue Stiftingtalstraße 6/III, A-8010 Graz, Austria

\* Corresponding author; e-mail: [bernd.nidetzky@tugraz.at](mailto:bernd.nidetzky@tugraz.at); phone: +43 3168738400

|                                                                                                                                                                                 |    |
|---------------------------------------------------------------------------------------------------------------------------------------------------------------------------------|----|
| <b>Supplementary Figure 1.</b> General scheme of enzymatic hydrolysis. ....                                                                                                     | 5  |
| <b>Supplementary Figure 2.</b> Multistep reaction mechanism of enzymes of glycoside hydrolase family GH4 used in the cleavage of 6-phospho- $\beta$ -glucoside substrates. .... | 6  |
| <b>Supplementary Figure 3.</b> Puerarin degradation pathway in the human gut bacterium PUE... ..                                                                                | 7  |
| <b>Supplementary Figure 4.</b> Reaction mechanism of CGE-catalyzed $\beta$ -elimination as proposed by Mori <i>et al.</i> ....                                                  | 7  |
| <b>Supplementary Figure 5.</b> <i>O</i> - and <i>C</i> -glycoside substrates of GlycDH. ....                                                                                    | 8  |
| <b>Supplementary Figure 6.</b> HPLC analysis of GlycDH reaction with different glucosides.....                                                                                  | 9  |
| <b>Supplementary Figure 7.</b> <i>C</i> -glycosides oxidized by GlycDH. ....                                                                                                    | 10 |
| <b>Supplementary Figure 8.</b> TLC analysis of GlycDH-catalyzed oxidations. ....                                                                                                | 11 |
| <b>Supplementary Figure 9.</b> GlycDH catalyzed oxidation of nothofagin. ....                                                                                                   | 12 |
| <b>Supplementary Figure 10.</b> $^1\text{H}$ NMR spectrum of 3-keto-phlorizin and 3-diol-phlorizin.....                                                                         | 13 |
| <b>Supplementary Figure 11.</b> COSY analysis of 3-keto-phlorizin and 3-diol-phlorizin. ....                                                                                    | 14 |
| <b>Supplementary Figure 12.</b> $^1\text{H}$ NMR (with solvent suppression) spectrum of keto-puerarin                                                                           | 15 |
| <b>Supplementary Figure 13.</b> HSQC analysis of 2-keto-puerarin.....                                                                                                           | 16 |
| <b>Supplementary Figure 14.</b> TOCSY analysis of 2-keto-puerarin. ....                                                                                                         | 17 |
| <b>Supplementary Figure 15.</b> $^1\text{H}$ NMR spectrum of 2-keto-nothofagin. ....                                                                                            | 18 |
| <b>Supplementary Figure 16.</b> COSY analysis of 2-keto-nothofagin.....                                                                                                         | 19 |
| <b>Supplementary Figure 17.</b> HPLC traces from GlycDH-catalyzed reactions.....                                                                                                | 20 |
| <b>Supplementary Figure 18.</b> Comparison of operons involving genes homologous to the GlycDH gene of <i>Rhizobium sp. GIN611</i> . ....                                       | 21 |
| <b>Supplementary Figure 19.</b> Proposed levoglucosan degradation pathway. ....                                                                                                 | 22 |
| <b>Supplementary Figure 20.</b> HPLC chromatogram of an <i>AtOGE</i> catalyzed deglycosylation of 3-keto-phlorizin. ....                                                        | 23 |
| <b>Supplementary Figure 21.</b> TLC analysis of <i>AtOGE</i> and <i>AtHYD</i> .....                                                                                             | 24 |
| <b>Supplementary Figure 22.</b> TLC analysis of 3-keto-phlorizin conversion by enzymes of the glucoside degrading operon of <i>A. tumefaciens</i> .....                         | 25 |
| <b>Supplementary Figure 23.</b> <i>AtOGE</i> 2.0 Å crystal structure. ....                                                                                                      | 26 |
| <b>Supplementary Figure 24.</b> Graphical representation of <i>PuCGE</i> subunit $\alpha$ and <i>AtOGE</i> secondary structures. ....                                           | 27 |
| <b>Supplementary Figure 25.</b> Superposition of <i>AtOGE</i> subunit $\alpha$ and subunit $\beta$ . ....                                                                       | 28 |
| <b>Supplementary Figure 26.</b> Superposition of <i>AtOGE</i> and CGEs.....                                                                                                     | 29 |
| <b>Supplementary Figure 27.</b> <i>AtOGE</i> variants catalyzing 3-keto-phlorizin elimination. ....                                                                             | 30 |
| <b>Supplementary Figure 28.</b> Overlay of <i>AtOGE</i> crystal structure and structure with modelled loops. ....                                                               | 31 |
| <b>Supplementary Figure 29.</b> RMSD values for enzyme and substrate during MD simulation.                                                                                      | 32 |
| <b>Supplementary Figure 30.</b> Ring pucker analysis.....                                                                                                                       | 33 |
| <b>Supplementary Figure 31.</b> MD-refined binding mode of 3-keto-phlorizin: <i>AtOGE</i> . ....                                                                                | 34 |
| <b>Supplementary Figure 32.</b> Catalytically relevant interatomic distances in the active site of <i>AtOGE</i> in complex with 3-keto-phlorizin. ....                          | 35 |
| <b>Supplementary Figure 33.</b> MD-refined binding mode of 3-keto-phlorizin: <i>PuCGE</i> . ....                                                                                | 36 |
| <b>Supplementary Figure 34.</b> Catalytically relevant interatomic distances in the active site of <i>PuCGE</i> in complex with 3-keto-phlorizin. ....                          | 37 |
| <b>Supplementary Figure 35.</b> MD-refined binding mode of 3-keto-puerarin: <i>PuCGE</i> .....                                                                                  | 38 |

|                                                                                                                                                                                              |    |
|----------------------------------------------------------------------------------------------------------------------------------------------------------------------------------------------|----|
| <b>Supplementary Figure 36.</b> Catalytically relevant interatomic distances in the active site of <i>Pu</i> CGE in complex with 3-keto-puerarin.....                                        | 39 |
| <b>Supplementary Figure 37.</b> <i>Pu</i> CGE-catalyzed elimination of keto- <i>C</i> -glycosides.....                                                                                       | 40 |
| <b>Supplementary Figure 38.</b> Time courses of <i>At</i> OGE-catalyzed elimination of oxidized <i>C</i> -glycoside and oxidized/unoxidized <i>O</i> -glycoside substrates.....              | 41 |
| <b>Supplementary Figure 39.</b> Kinetic analysis of OGE- and CGE-catalyzed elimination of 3-keto-phlorizin. ....                                                                             | 42 |
| <b>Supplementary Figure 40.</b> Relative activity of <i>Pu</i> CGE- and <i>At</i> OGE in deglycosylation reactions of <i>O</i> - and <i>C</i> -glycosides in metal-chelating conditions..... | 43 |
| <b>Supplementary Figure 41.</b> <sup>1</sup> H NMR spectrum of products from <i>At</i> OGE reaction with 3-keto-phlorizin. ....                                                              | 44 |
| <b>Supplementary Figure 42.</b> TOCSY analysis from 2-hydroxy-3-keto-glucal product of <i>At</i> OGE-catalyzed 3-keto-phlorizin deglycosylation. ....                                        | 45 |
| <b>Supplementary Figure 43.</b> COSY analysis of products from <i>At</i> OGE reaction with 3-keto-phlorizin. ....                                                                            | 46 |
| <b>Supplementary Figure 44.</b> In situ <sup>1</sup> H NMR analysis of <i>At</i> OGE reaction with 3-keto-phlorizin. ....                                                                    | 47 |
| <b>Supplementary Figure 45.</b> <sup>1</sup> H NMR spectrum of product from <i>Pu</i> CGE reaction with 2-/3-keto-puerarin. ....                                                             | 48 |
| <b>Supplementary Figure 46.</b> <sup>1</sup> H NMR spectrum of products from <i>Pu</i> CGE reaction with 3-keto-phlorizin. ....                                                              | 49 |
| <b>Supplementary Figure 47.</b> <sup>1</sup> H NMR spectrum of 4NPα3ketoG.....                                                                                                               | 50 |
| <b>Supplementary Figure 48.</b> <sup>1</sup> H NMR spectrum of 4NPβ3ketoG. ....                                                                                                              | 51 |
| <b>Supplementary Figure 49.</b> Product identification from the GlycDH-catalyzed reaction with maltose. ....                                                                                 | 52 |
| <b>Supplementary Figure 50.</b> Product identification from the GlycDH-catalyzed reaction with cellobiose.....                                                                               | 53 |
| <b>Supplementary Figure 51.</b> Stereochemical preference of <i>At</i> OGE and <i>Pu</i> CGE. ....                                                                                           | 54 |
| <b>Supplementary Figure 52.</b> <sup>1</sup> H NMR spectra of <i>At</i> OGE-catalyzed elimination of 4NPα3ketoG and 4NPβ3ketoG.....                                                          | 55 |
| <b>Supplementary Figure 53.</b> <sup>1</sup> H NMR spectra of <i>At</i> OGE-catalyzed elimination of 3'-ketomaltose and 3'-keto-cellobiose.....                                              | 56 |
| <b>Supplementary Figure 54.</b> Spontaneous deglycosylation of 3-keto-phlorizin. ....                                                                                                        | 57 |
| <b>Supplementary Figure 55.</b> Conserved Tyr residues among CGEs.....                                                                                                                       | 58 |
| <b>Supplementary Figure 56.</b> Sequence alignment of CGEs. ....                                                                                                                             | 59 |
| <b>Supplementary Figure 57.</b> Relative activity of <i>Pu</i> CGE variants with <i>O</i> - and <i>C</i> -glycosides compared to the wild-type (WT). ....                                    | 60 |
| <b>Supplementary Figure 58.</b> BglK catalyzed phosphorylation of phlorizin and nothofagin....                                                                                               | 61 |
| <b>Supplementary Figure 59.</b> TLC analysis of BglK-catalyzed phosphorylation. ....                                                                                                         | 62 |
| <b>Supplementary Figure 60.</b> Time courses of GlvA-catalyzed reactions.....                                                                                                                | 63 |
| <b>Supplementary Figure 61.</b> Time courses of BglT-catalyzed reactions. ....                                                                                                               | 64 |
| <b>Supplementary Figure 62.</b> TLC analysis of GlvA-catalyzed deglycosylation of phlorizin6P and nothofagin6P.....                                                                          | 65 |

|                                                                                                                                                |    |
|------------------------------------------------------------------------------------------------------------------------------------------------|----|
| <b>Supplementary Figure 63.</b> HPLC chromatogram of GlvA-catalyzed deglycosylation of phlorizin6P. ....                                       | 66 |
| <b>Supplementary Figure 64.</b> Proposed mechanisms of glycosyltransferase and alkyltransferase reactions. ....                                | 67 |
| <b>Supplementary Figure 65.</b> SDS-PAGE showing the purified enzymes used in this study. .                                                    | 68 |
| <br>                                                                                                                                           |    |
| <b>Supplementary Table 1.</b> Activity parameters of GlycDH. ....                                                                              | 69 |
| <b>Supplementary Table 2.</b> Crystallographic data of <i>At</i> OGE. . ....                                                                   | 70 |
| <b>Supplementary Table 3.</b> RMSD values of <i>At</i> OGE monomer $\beta$ superimposed with monomer $\alpha$ and CGEs. ....                   | 71 |
| <b>Supplementary Table 4.</b> Activity parameters of deglycosylating enzyme systems compared. ....                                             | 72 |
| <b>Supplementary Table 5.</b> Activity of <i>Pu</i> CGE variants with <i>O</i> - and <i>C</i> -glycosides compared to the wild-type form. .... | 73 |
| <b>Supplementary Table 6.</b> Sequences of enzymes. ....                                                                                       | 74 |
| <b>Supplementary Table 7.</b> Oligonucleotide primers used in this study. ....                                                                 | 78 |



## Supplementary Figures

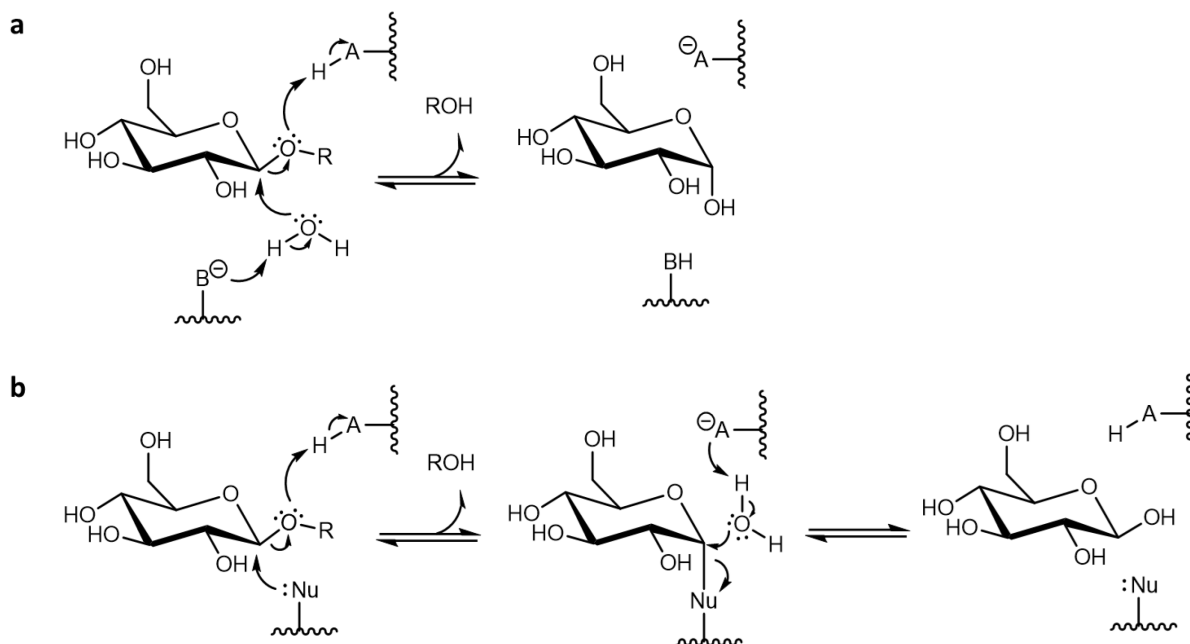

**Supplementary Figure 1.** General scheme of enzymatic hydrolysis of a  $\beta$ -glucoside by an inverting (**a**) and retaining (**b**)  $\beta$ -glycoside hydrolase. Aglycone shown as R, the enzyme catalytic base and acid as B and A, respectively. Drawn based on literature.<sup>1,2</sup> Nu = nucleophile; A = general acid catalyst; B = general base catalyst.

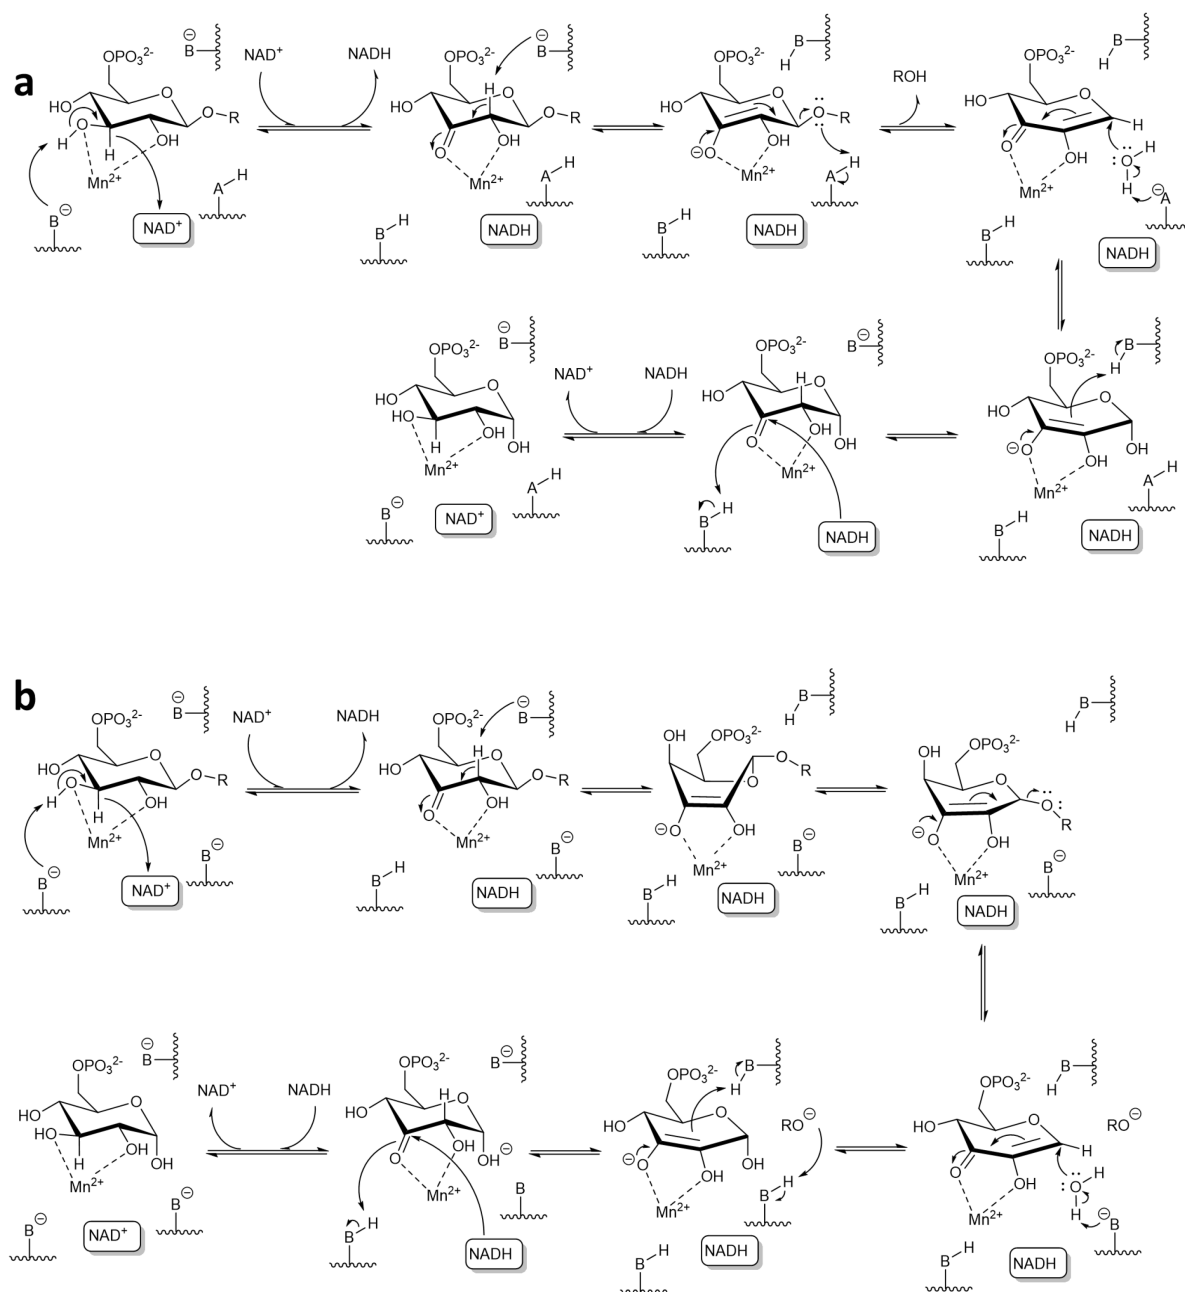

**Supplementary Figure 2.** Multistep reaction mechanism of enzymes of glycoside hydrolase family GH4 used in the cleavage of 6-phospho- $\beta$ -glucoside substrates. **a.** Proposed mechanism involving acid-assisted  $\beta$ -elimination using GlvA from *Bacillus subtilis*<sup>3</sup> as an example. The scheme is based on Rajan et al.<sup>4</sup> and Yip et al.<sup>5</sup> **b.** Proposed reaction mechanism for GH4 family enzyme  $\alpha$ -galactosidase from *Citrobacter freundii* (MelA) involving sugar ring puckering as a significant rate limiting step and  $\beta$ -elimination independent of acid catalysis. The reaction mechanism is based on Sannikova et al.<sup>6</sup> B = general base catalyst.

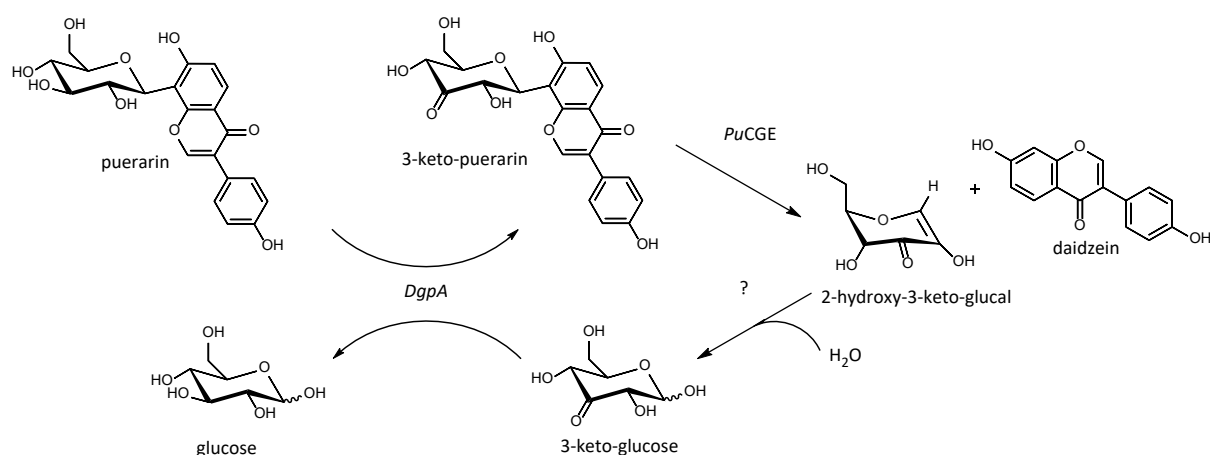

**Supplementary Figure 3.** Puerarin degradation pathway in the human gut bacterium PUE (*PuCGE*), as proposed by Nakamura *et al.*<sup>7</sup> The pathway involves the oxidoreductase DgpA and the C-glycoside eliminase *PuCGE*. Puerarin is oxidized by DgpA to 3-keto-puerarin. *PuCGE* deglycosylates the compound to the respective aglycone daidzein and 2-hydroxy-3-keto-glucal, which is subsequently converted to 3-keto-glucose and then reduced to glucose. The conversion of 3-keto-glucal to 3-keto-glucose involves an enzyme yet to be shown.

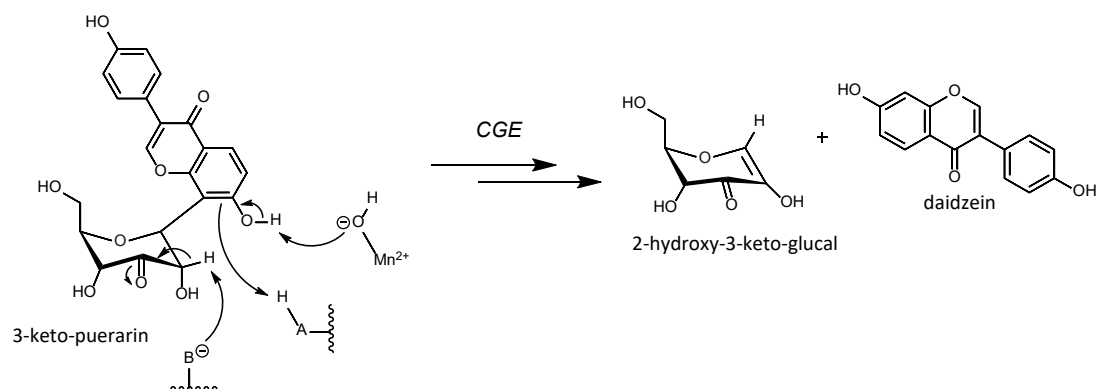

**Supplementary Figure 4.** Reaction mechanism of CGE-catalyzed β-elimination of 3-keto-puerarin, as proposed by Mori *et al.*<sup>8</sup> A catalytic base promotes abstraction of the C2 hydrogen of the 3-keto-D-glucosyl moiety. The hydroxy group *ortho* to the reactive carbon of the aglycone is deprotonated by metal-bound hydroxide. Proton transfer from a catalytic acid leads to a proposed de-aromatization of the aglycone. Elimination causes cleavage of the C-C linkage and yields 2-hydroxy-3-keto-glucal and daidzein. A = general acid catalyst; B = general base catalyst.

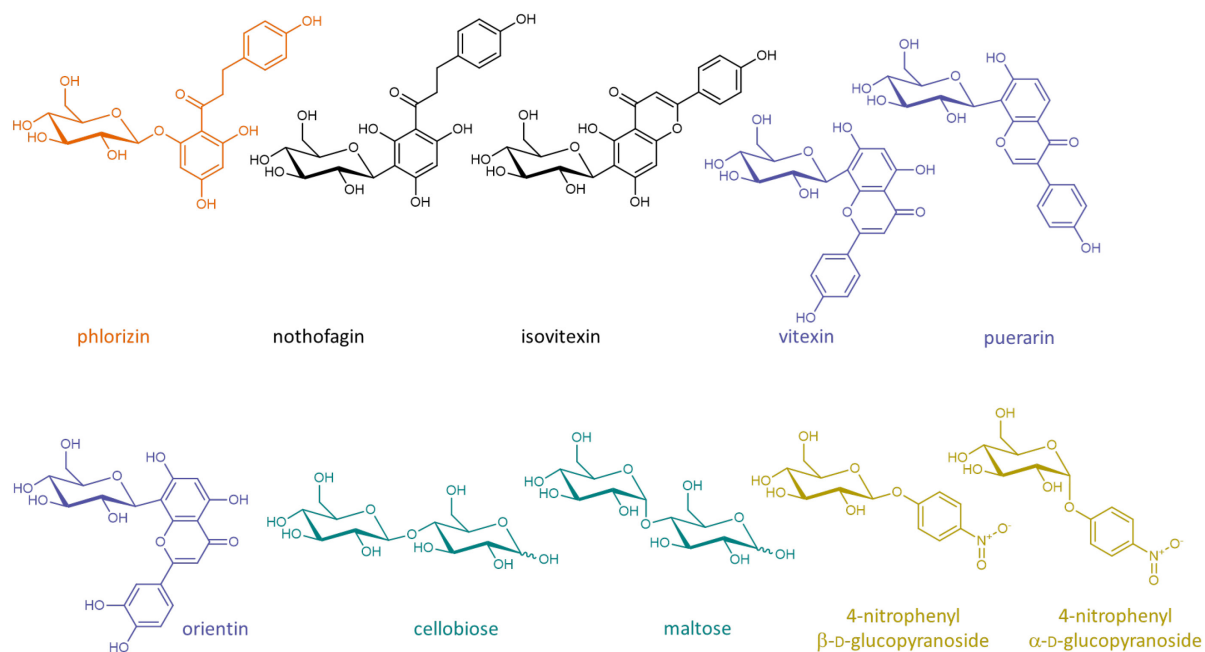

**Supplementary Figure 5.** *O*- and *C*-glycoside substrates of GlycDH. *O*-glycosides in orange, *C*-6-glycosides in black, *C*-8-glycosides in blue, *O*-linked disaccharides in turquoise and 4-nitrophenyl substrates in ochre.

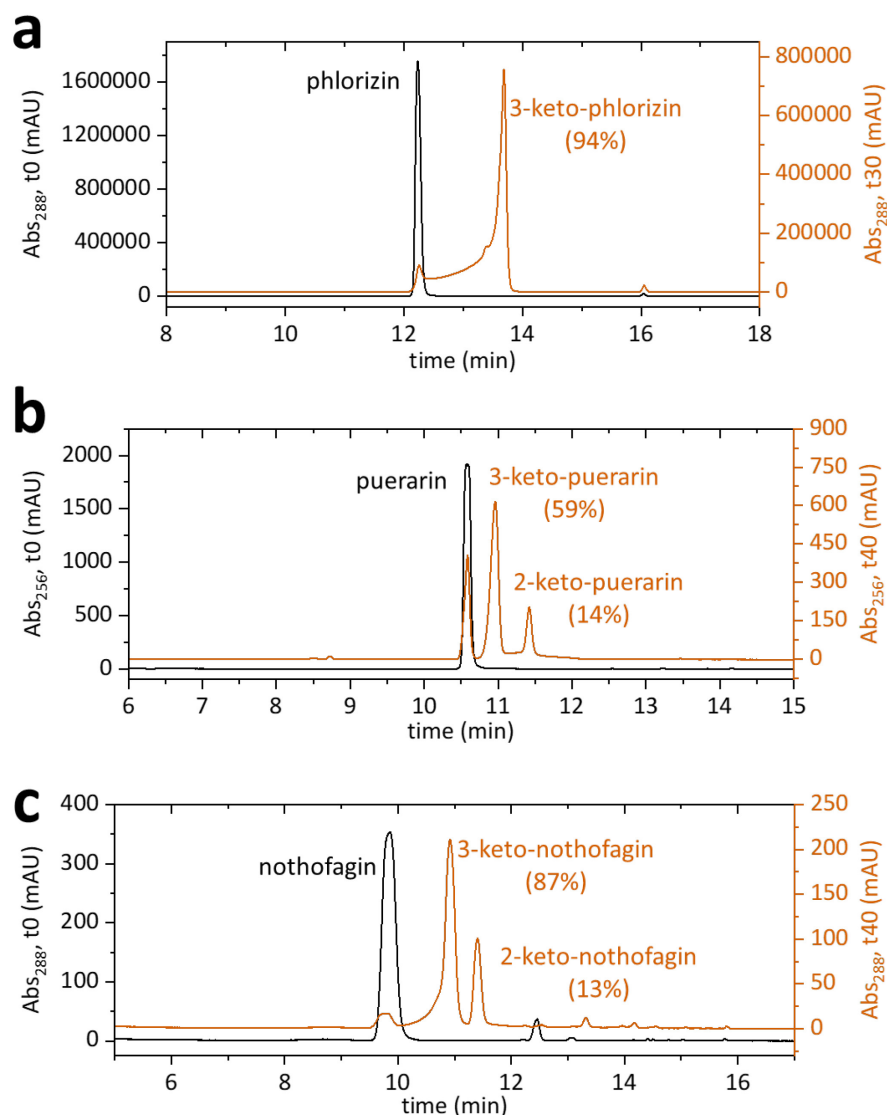

**Supplementary Figure 6.** HPLC analysis of GlycDH reaction with different glucosides ( $n = 1$  individual experiment). **a.** Phlorizin. **b.** Puerarin. **c.** Nothofagin. Reactions **a**, **b** and **c** were performed in potassium phosphate buffer (100 mM; pH 5.7) with 0.02, 0.25 and 0.10 mg/mL enzyme, respectively. For puerarin, 2.0 mM TCEP was added. All reactions were supplied with 8.0 mM  $K_3[Fe(CN)_6]$  as electron acceptor and substrates were dissolved in 10% DMSO. Reactions were carried out at 37 °C under agitation (650 rpm), quenched in MeCN and analyzed on HPLC. The 2- and 3-keto products were separated by HPLC and their identity was assigned based NMR analysis (Supplementary Figure 10-16). For further experimental details and for the analytical procedures used, see the Methods section of the main manuscript.

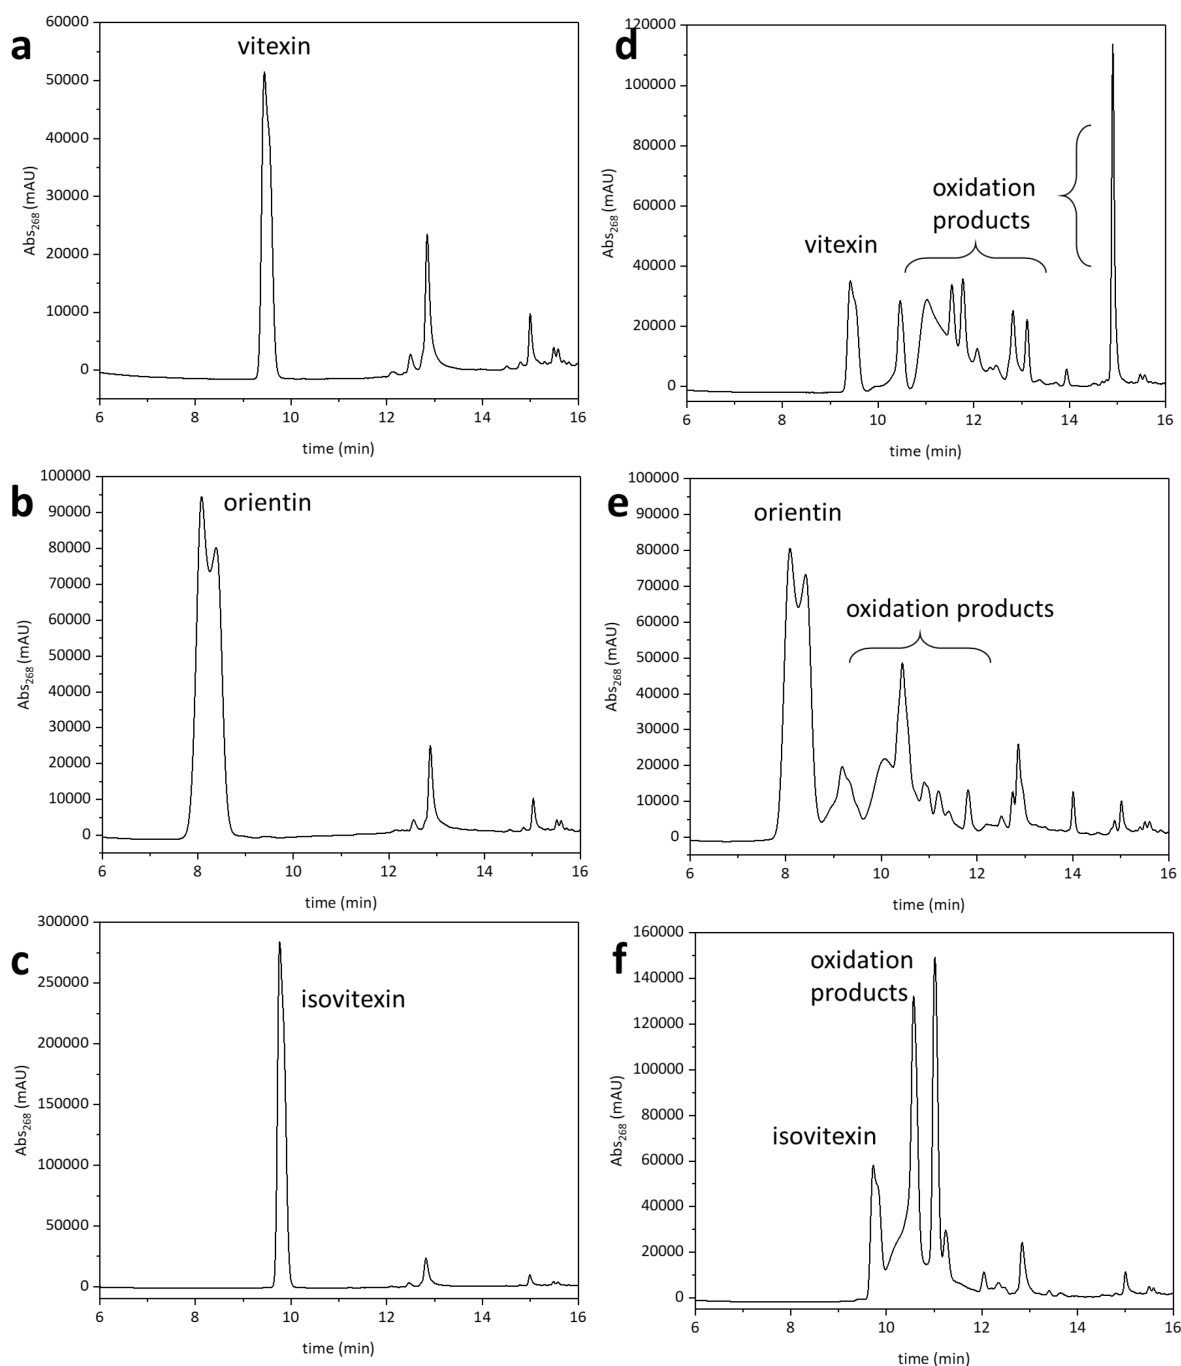

**Supplementary Figure 7.** C-glycosides oxidized by GlycDH ( $n = 1$  individual experiment). **a**, **b** and **c**. Negative controls with no enzyme added; **d**, **e** and **f**. Reactions catalyzed by GlycDH (0.25 mg/mL). Substrates (2.0 mM) were dissolved in potassium phosphate buffer (100 mM; pH 5.7) containing 10% (v/v) DMSO, 8.0 mM  $K_3[Fe(CN)_6]$ . Reactions were carried out at 37 °C and 650 rpm agitation. Samples were quenched with MeCN and measured on HPLC.

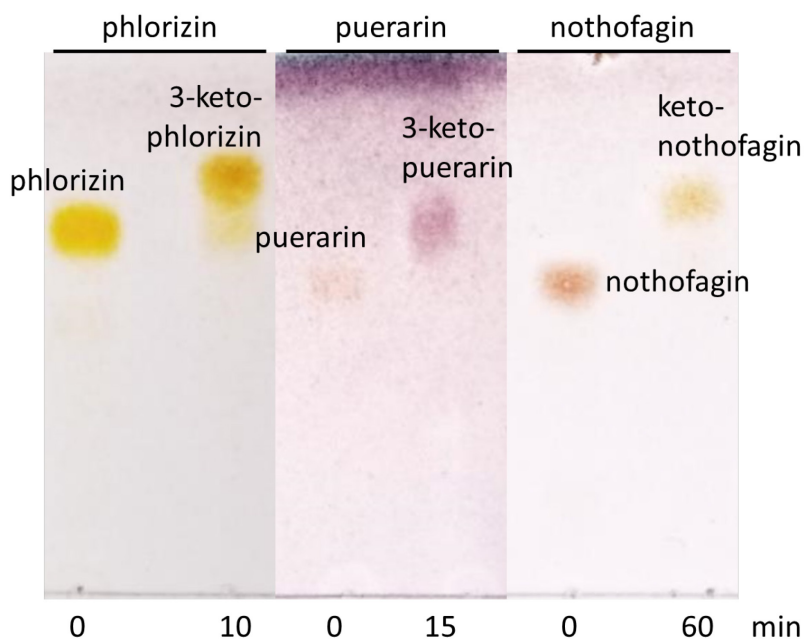

**Supplementary Figure 8.** TLC analysis of GlycDH-catalyzed oxidation of phlorizin, puerarin and nothofagin (n = 1 individual experiment). Phlorizin, puerarin and nothofagin oxidations were performed in potassium phosphate buffer (100 mM; pH 5.7) with 0.02, 0.25 and 0.10 mg/mL enzyme, respectively. For puerarin, 2.0 mM TCEP were added. All reactions were supplied with 8.0 mM  $K_3[Fe(CN)_6]$  as electron acceptor and substrates were dissolved in 10% (v/v) DMSO. Reactions were performed in 37 °C under agitation (650 rpm). Compounds were separated with a 9:1 mobile phase of MeCN with  $H_2O$  and TLC plates were stained with *p*-anisaldehyde based stain. Source data are provided as a Source Data file.

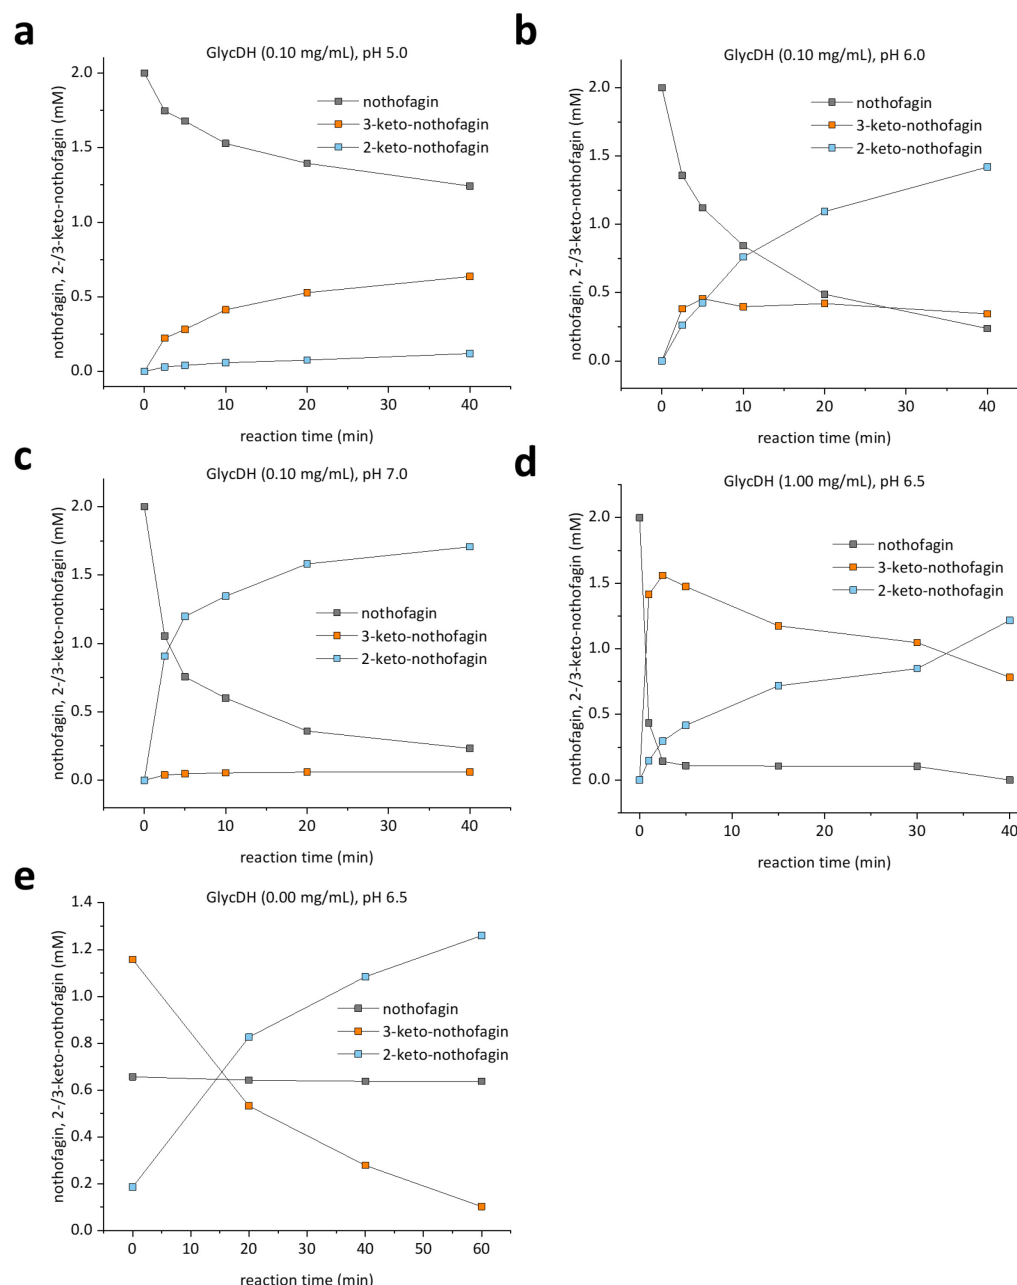

**Supplementary Figure 9.** GlycDH catalyzed oxidation of nothofagin and spontaneous isomerization of 3-keto- to 2-keto-nothofagin. The effect of pH was analyzed at pH 5.0, 6.0, and 7.0 (**a-c**). The effect of excess GlycDH was studied at a protein loading of 1.00 mg/mL (**d**). The isomerization of isolated 2-/3-keto-nothofagin in the absence of protein is shown in **e**. Reactions are performed at 37 °C and 650 rpm agitation. Standard conditions used were 100 mM potassium phosphate buffer (pH 6.5), 10% (v/v) DMSO, 8.0 mM  $K_3[Fe(CN)_6]$ , 2.0 mM nothofagin. GlycDH was used at a concentration of 0.10 mg/mL unless mentioned otherwise. For further experimental details and for the analytical procedures used, see the Methods section of the main manuscript. (n = 1 individual experiment). Source data are provided as a Source Data file.



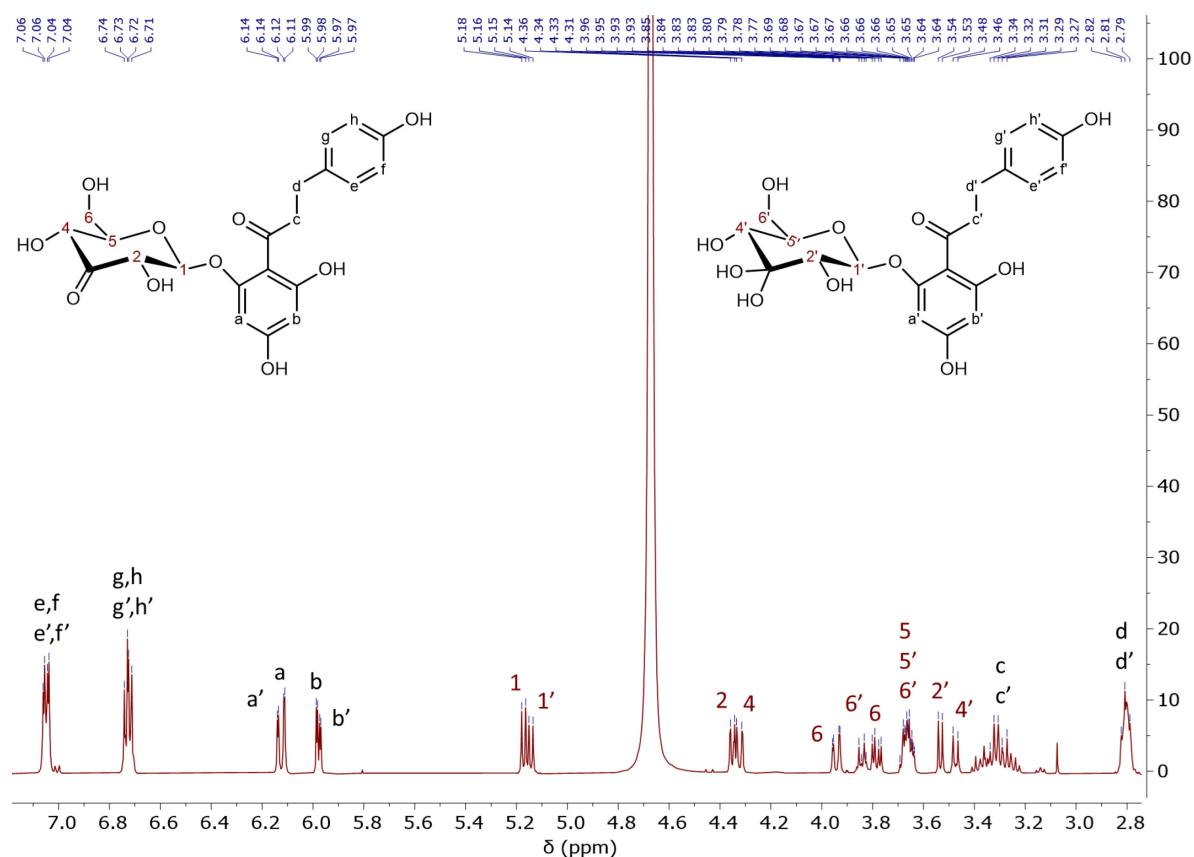

**Supplementary Figure 10.**  $^1\text{H}$  NMR spectrum of 3-keto-phlorizin and 3-diol-phlorizin (500 MHz, 10% DMSO- $\text{d}_6$ , phosphate buffer  $\text{D}_2\text{O}$  pD 7.0):  $\delta$  5.17 (d,  $J = 7.9$  Hz, 1H, H-1), 5.14 (d,  $J = 7.9$  Hz, 1H, H-1'), 4.35 (d,  $J = 7.8$  Hz, 1H, H-2), 4.32 (d,  $J = 10.2$  Hz, 1H, H-4), 3.94 (dd,  $J = 12.5, 2.1$  Hz, 1H, H-6), 3.84 (dd,  $J = 9.8, 4.4$  Hz, 1H, H-6'), 3.78 (dd,  $J = 12.5, 4.9$ , 1H, H-6), 3.69–3.64 (m, 3H, H-5, H-5' and H.6'), 3.53 (d,  $J = 7.9$ , 1H, H-2'), 3.47 (d,  $J = 9.6$ , 1H, H-4')

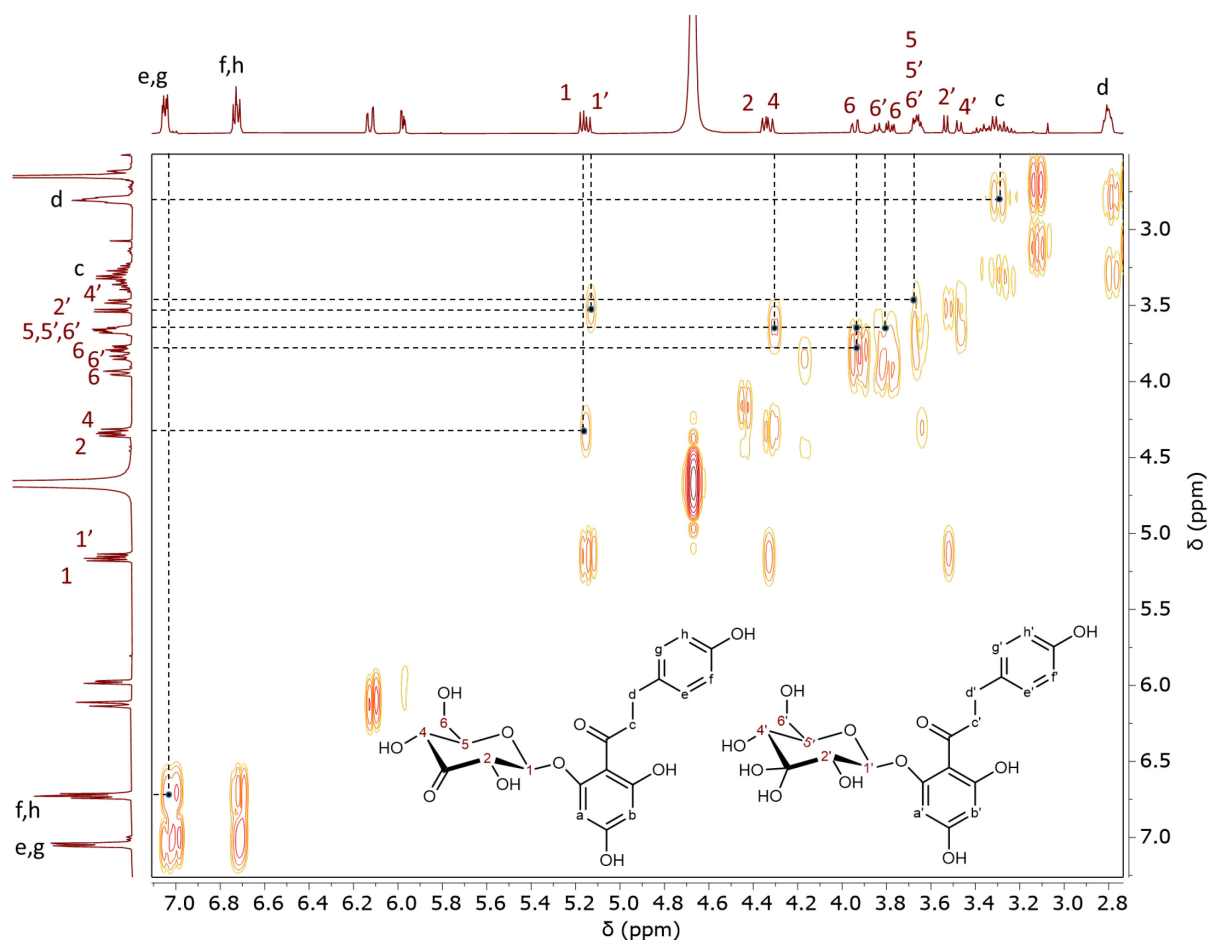

**Supplementary Figure 11.** Correlated spectroscopy (COSY) analysis of 3-keto-phlorizin and 3-diol-phlorizin (500 MHz, 10% DMSO- $d_6$ , phosphate buffer in  $D_2O$ , pD 7.0). 2D-NMR shows proton coupling of H-e and H-g with H-f and H-h, H-1 with H-2, H-4 with H-5, H-5 with H-6, H-6 with H-6, H-1' with H-2', H-4' with H-5', H-5' with H-6', H-6' with H-6', and H-c with H-d.

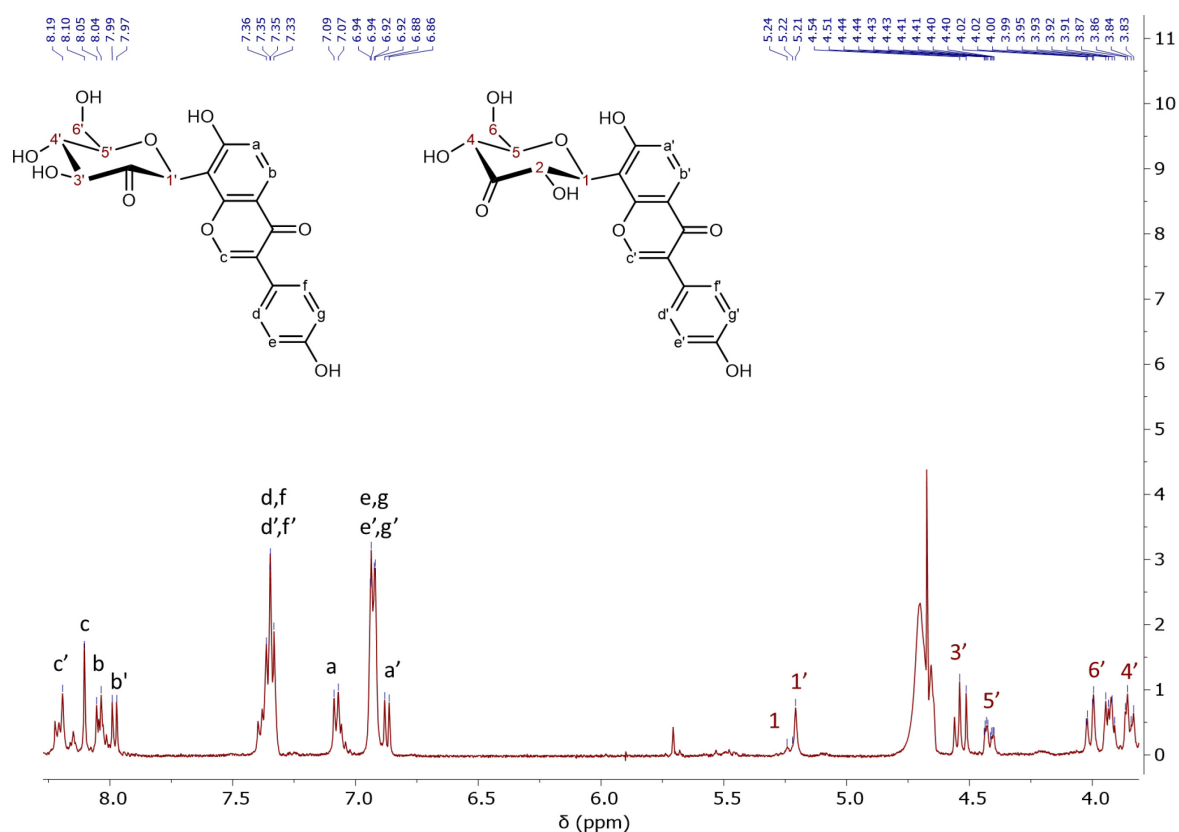

**Supplementary Figure 12.**  $^1\text{H}$  NMR (with solvent suppression) spectrum of keto-puerarin (500 MHz, 10% DMSO- $\text{d}_6$ ,  $\text{D}_2\text{O}$ ):  $\delta$  8.19 (s, 1H, H-c'), 8.10 (s, 1H, H-c), 8.04 (d,  $J$  = 9.1 Hz, 1H, H-b), 7.98 (d,  $J$  = 9.2 Hz, 1H, H-b'), 7.38–7.31 (m, 4H, H-d, H-f, H-d' and H-f'), 7.08 (d,  $J$  = 8.8 Hz, 1H, H-a), 6.94–6.92 (m, 4H, H-e, H-g, H-e' and H-g'), 6.87 (d,  $J$  = 9.1 Hz, 1H, H-a'), 5.23 (d,  $J$  = 11.2 Hz, 1H, H-1), 5.21 (s, 1H, H-1'), 4.53 (d,  $J$  = 13.3 Hz, 1H, H-3'), 4.42 (m,  $J$  = 12.9, 4.9, 2.2, 1H, H-5'), 4.01 (dd,  $J$  = 12.3, 2.3 Hz, 1H, H-6'), 3.93 (dd,  $J$  = 12.8, 5.3 Hz, 1H, H-6'), 3.84 (d,  $J$  = 12.5 Hz, 1H, H-4')

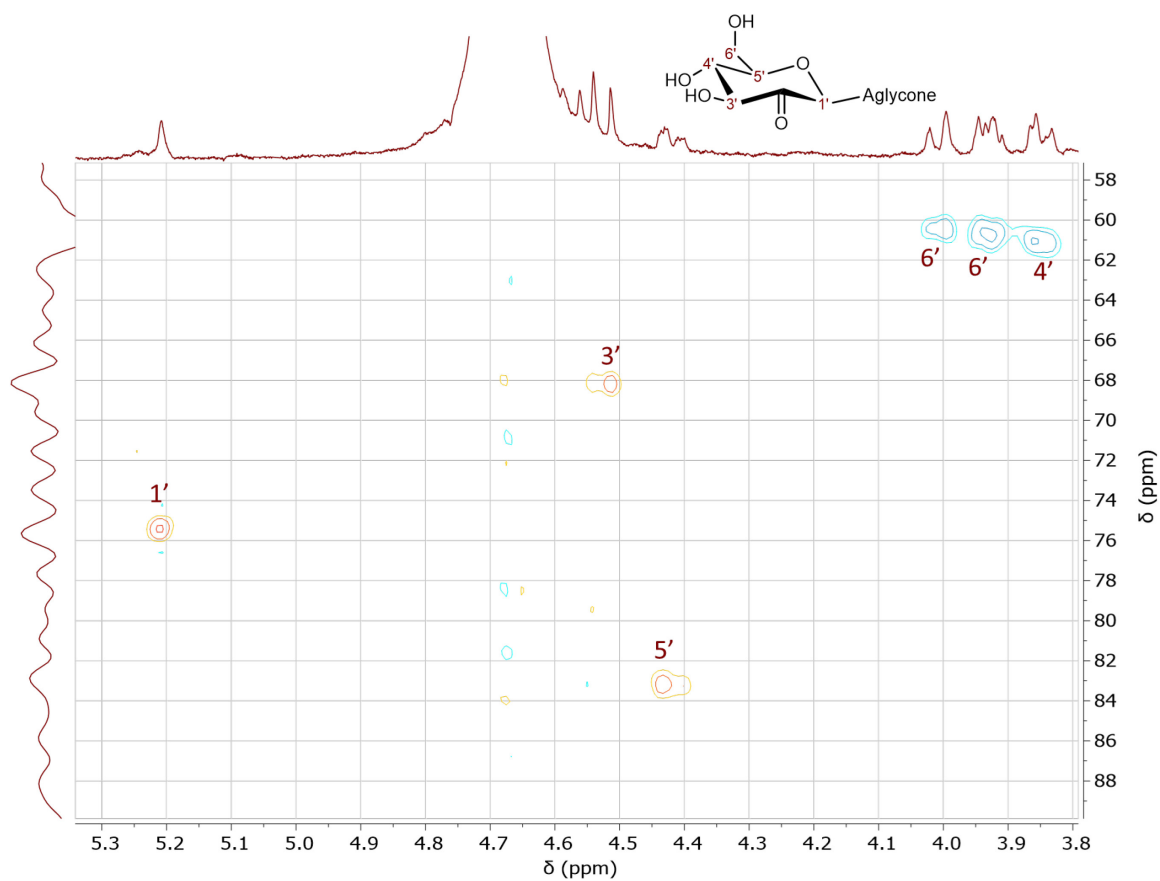

**Supplementary Figure 13.** Heteronuclear single quantum coherence spectroscopy (HSQC) analysis of 2-keto-puerarin (500 MHz, 10% DMSO- $d_6$ ,  $D_2O$ ). Coupling of carbons and protons of sugar moiety (2-keto- $\beta$ -glucosyl moiety) is shown.

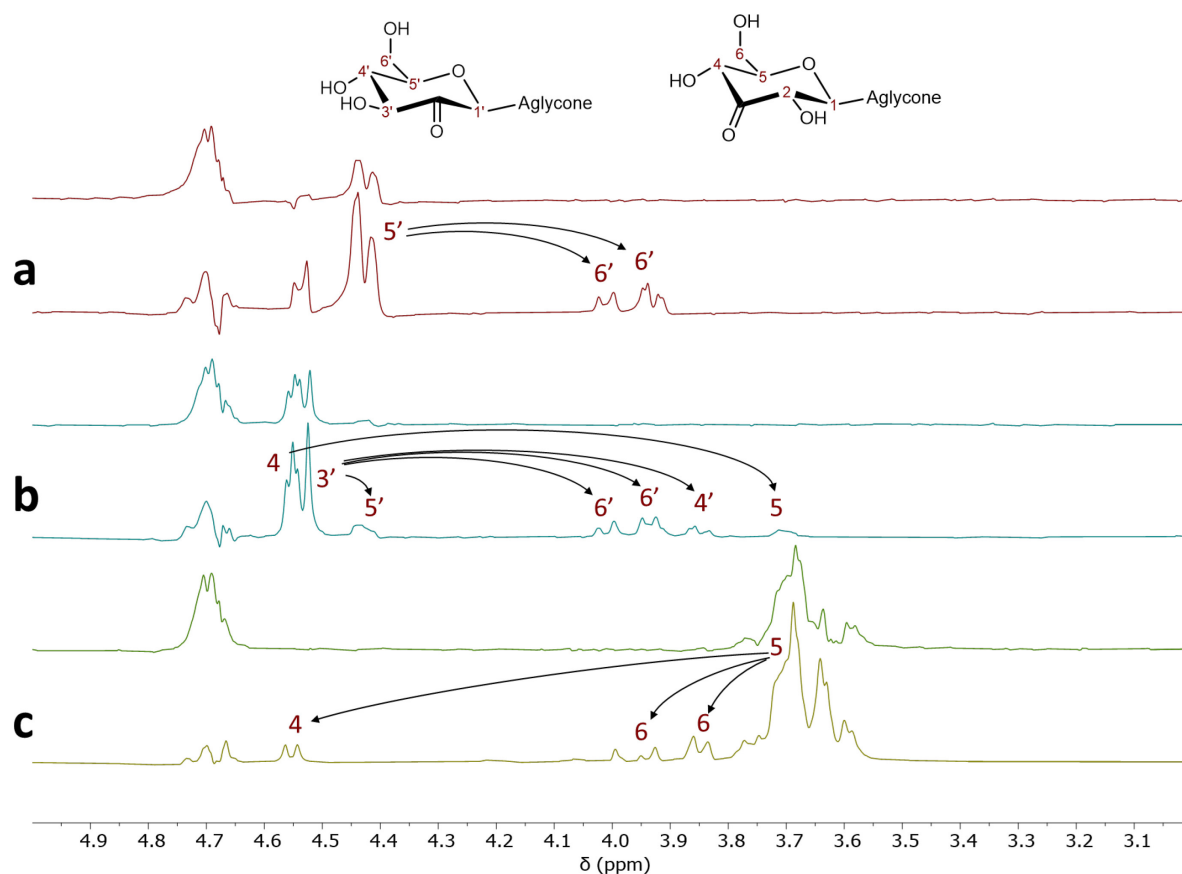

**Supplementary Figure 14.** Total correlation spectroscopy (TOCSY) analysis of 2-ketopuerarin (500 MHz, 10% DMSO- $d_6$ ,  $D_2O$ ). **a.** The maroon upper graph was pulsed at a selective band center of 4.42 ppm and a width of 29.2 Hz. **b.** The turquoise upper graph was pulsed at a selective band center of 4.54 ppm and a width of 34.9 Hz. **c.** The olive upper graph was pulsed at a selective band center of 3.67 ppm and a width of 117 Hz.

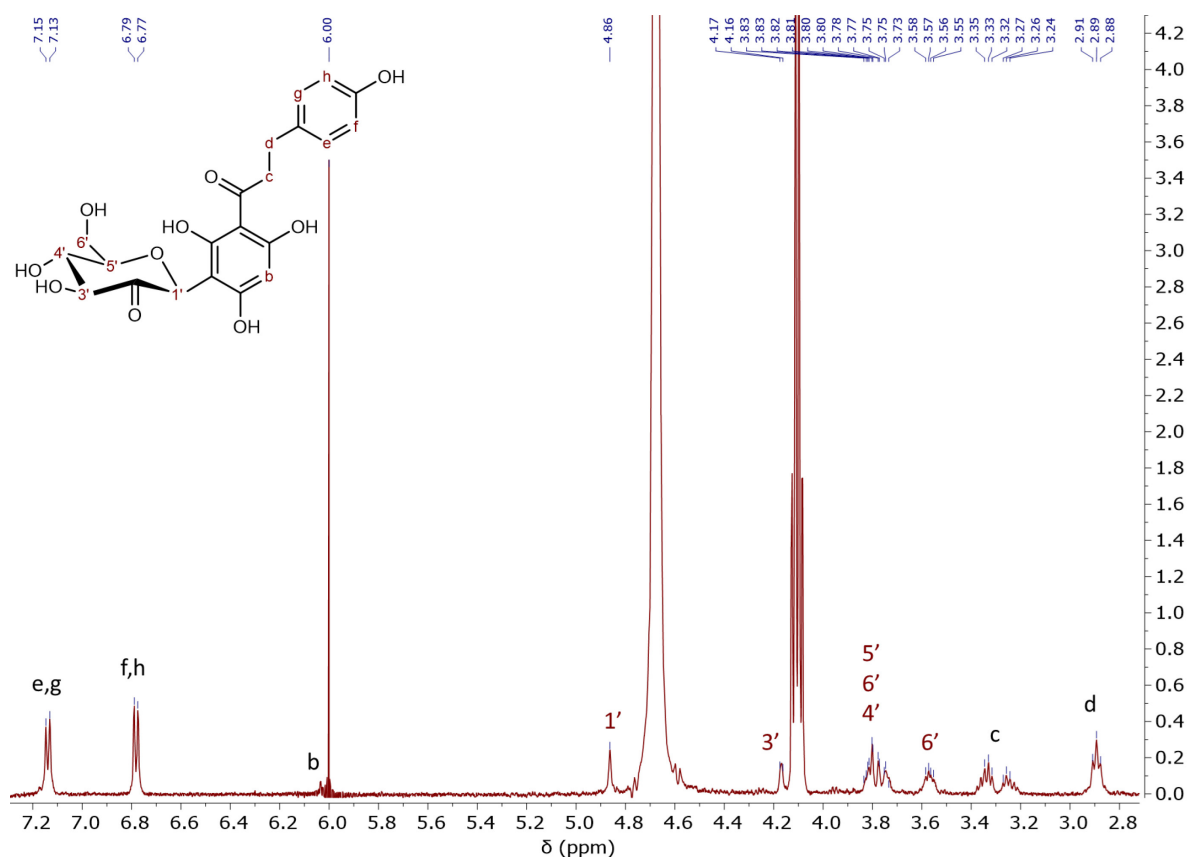

**Supplementary Figure 15.** <sup>1</sup>H NMR spectrum of 2-keto-nothofagin (500 MHz, 10% DMSO-d<sub>6</sub>, D<sub>2</sub>O): δ 7.14 (d, J = 7.8 Hz, 2H, H-e and H-g), 6.78 (d, J = 6.9 Hz, 2H, H-f and H-h), 6.03 (s, 1H, H-b), 4.86 (s, 1H, H-1'), 4.17 (d, J = 5.8 Hz, 1H, H-3'), 3.84–3.81 (m, 1H, H-5'), 3.79 (dd, J = 12.9, 2.1 Hz, 1H, H-6'), 3.57 (dd, J = 10.0, 5.8 Hz, 1H, H-6'), 3.33 (t, J = 7.6 Hz, 1H, H-c), 3.26 (t, J = 7.6 Hz, 1H, H-c), 2.90 (t, J = 7.8 Hz, 2H, H-d).

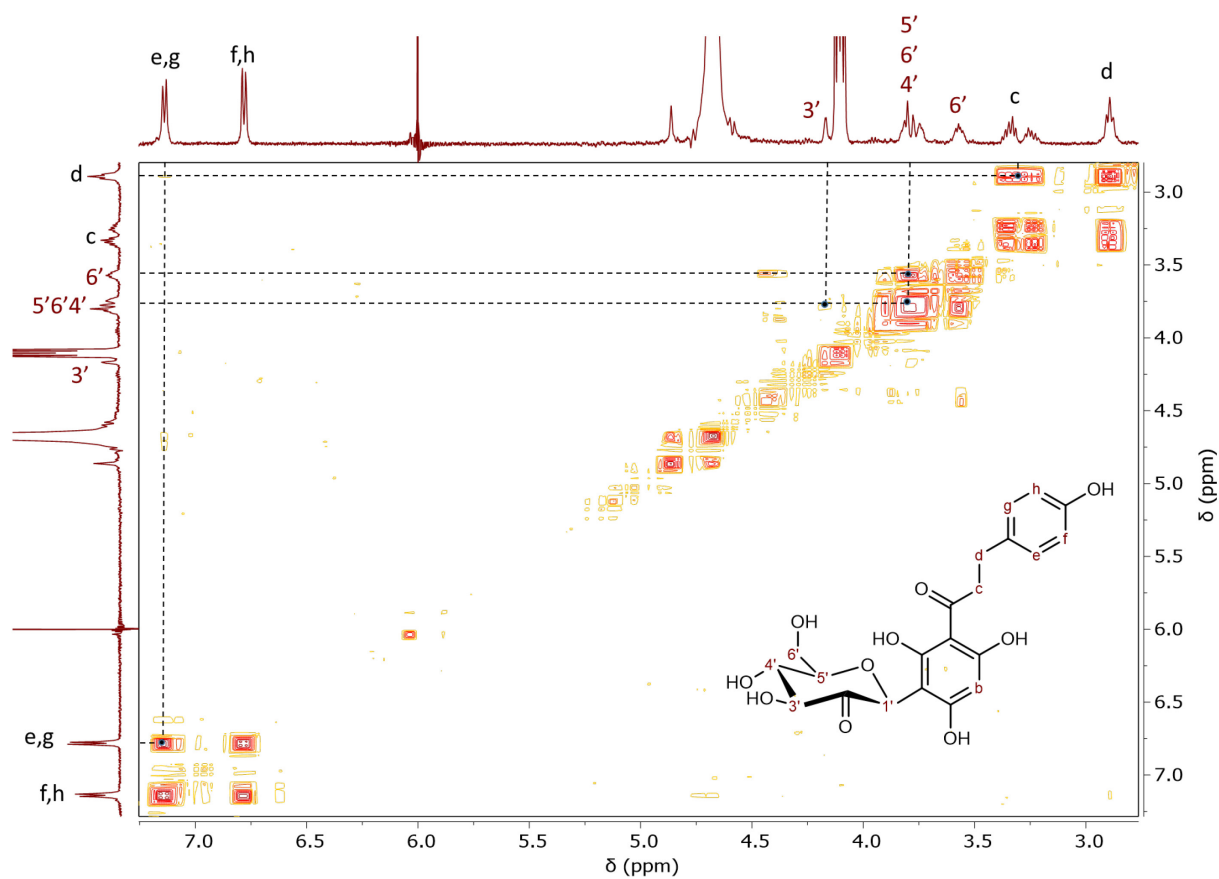

**Supplementary Figure 16.** COSY analysis of 2-keto-nothofagin (500 MHz, 10% DMSO-d<sub>6</sub>, D<sub>2</sub>O). 2D-NMR shows proton coupling of H-e and H-g with H-f and H-h, H-3' with H-4', H-4' with H-5', H-5' with H-6', H-6' with H-6' and H-c with H-d.

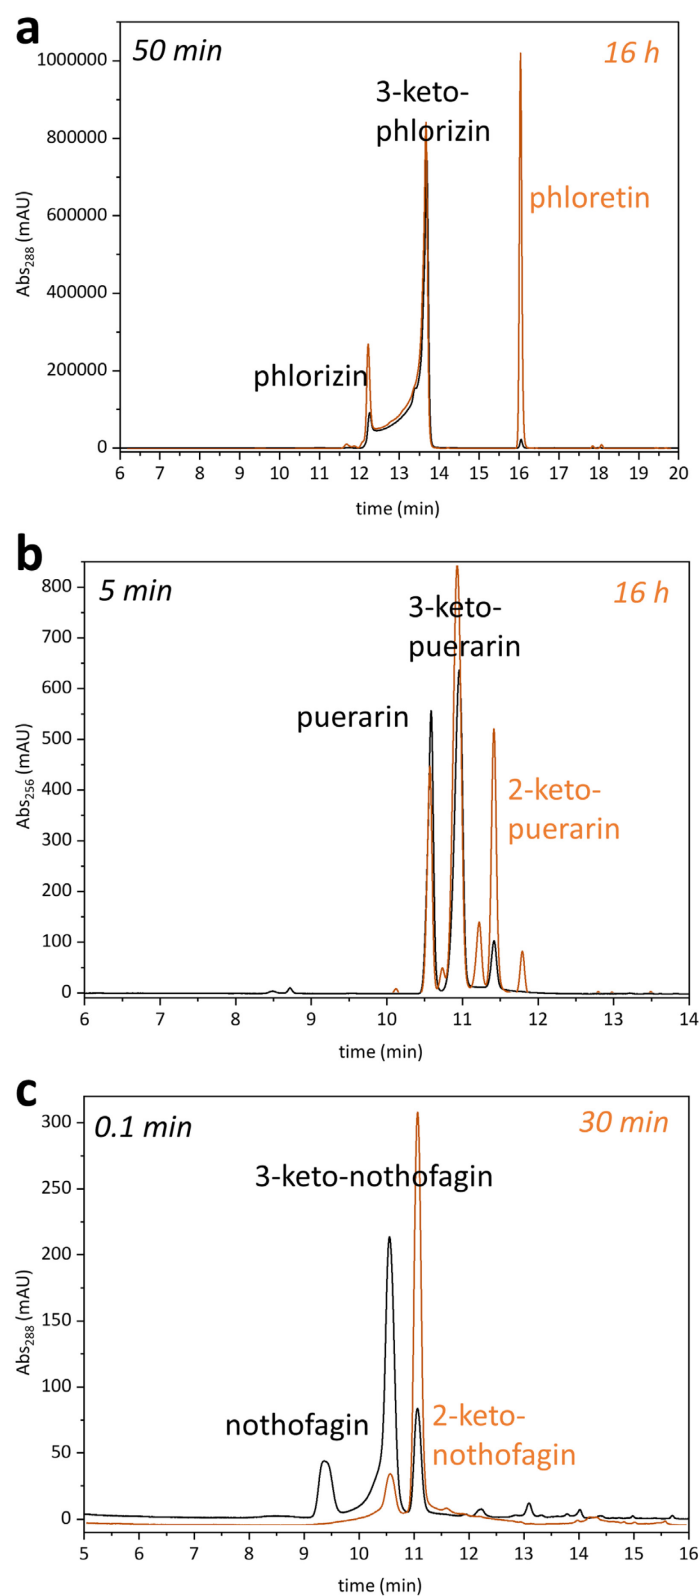

**Supplementary Figure 17.** HPLC traces from GlycDH-catalyzed reactions and spontaneous isomerization/degradation products ( $n = 1$  individual experiment). **a**, **b** and **c**. Oxidation products from phlorizin, puerarin and nothofagin, respectively, in black and side products upon longer incubation in orange.



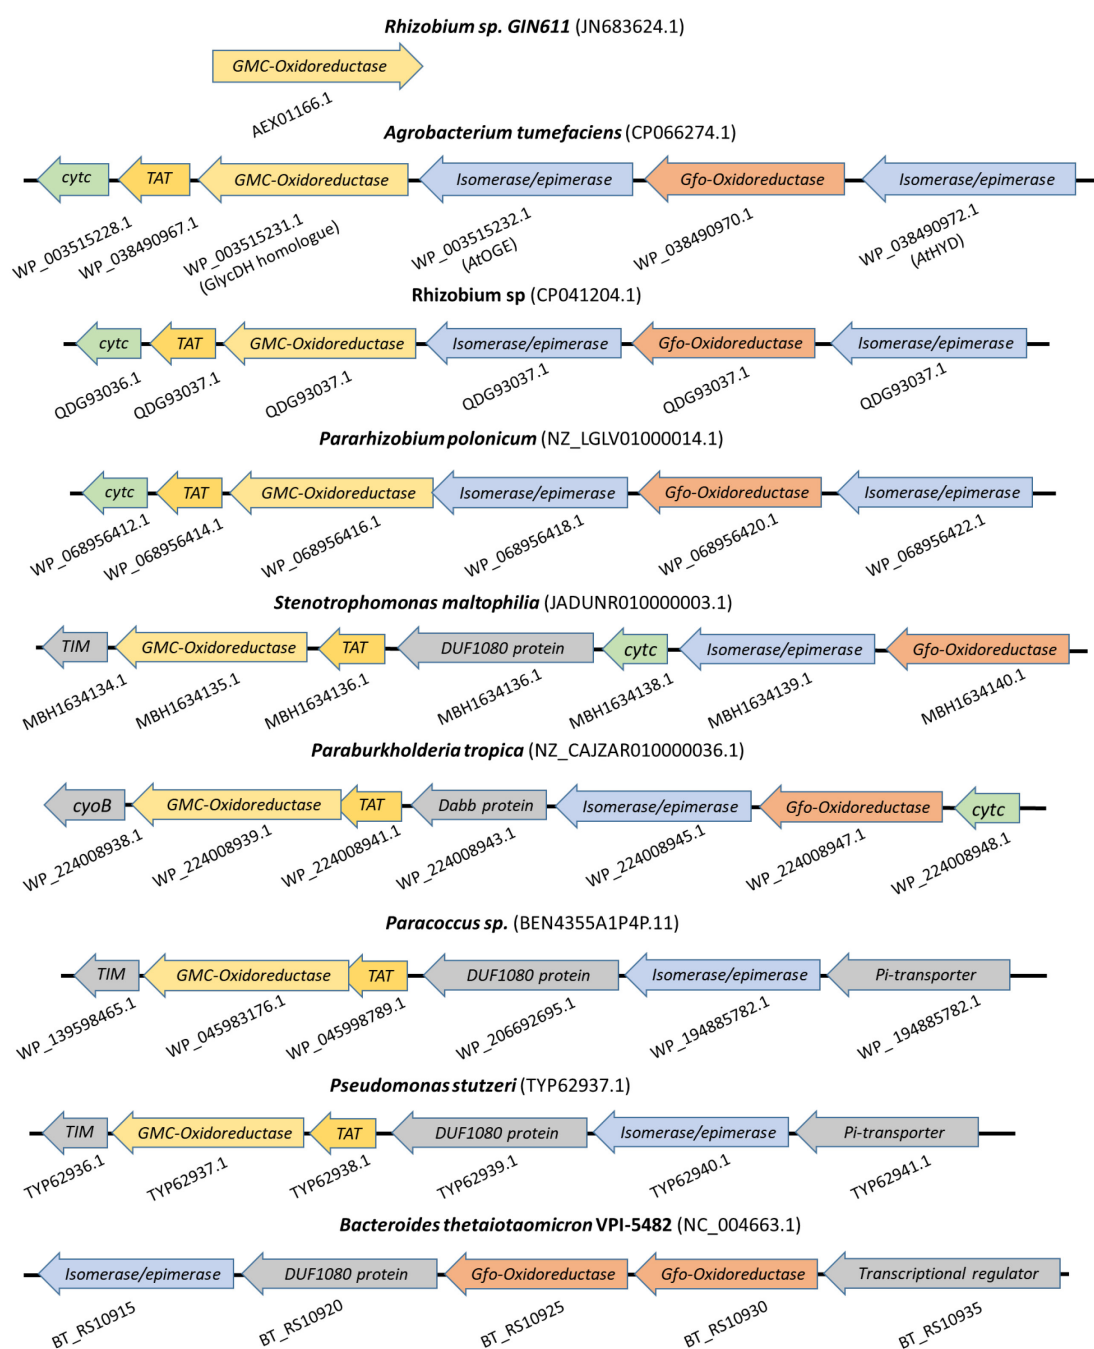

**Supplementary Figure 18.** Comparison of operons involving genes homologous to the GlycDH gene of *Rhizobium sp. GIN611*.<sup>9</sup> Microorganism names are shown in bold, NCBI reference sequence numbers in brackets, predicted protein families in arrows and respective NCBI reference sequences underneath. Enzyme families are depicted using identical colors, grey is used for various enzymes.

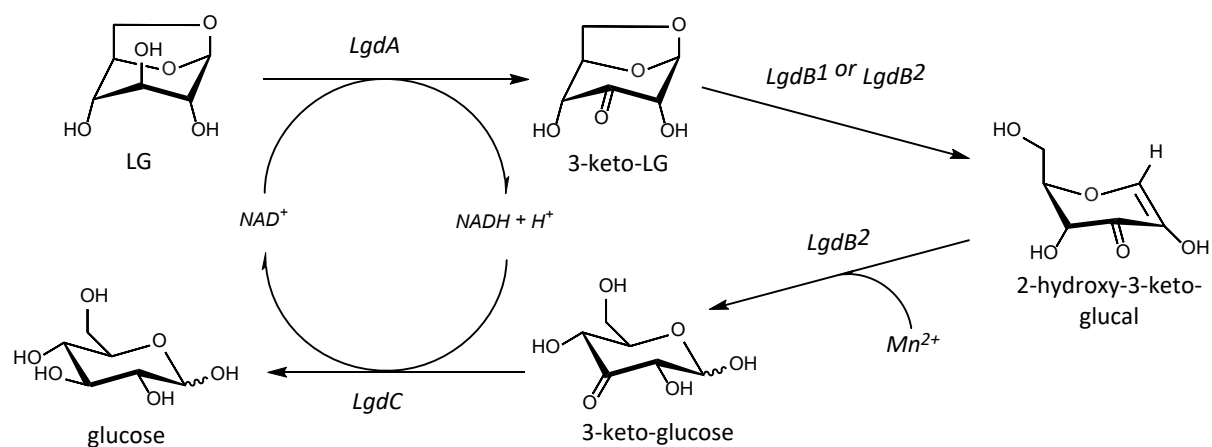

**Supplementary Figure 19.** Proposed levoglucosan (LG) degradation pathway from *Bacillus smithii* S-2701M by Yoshida *et al.*<sup>10</sup>

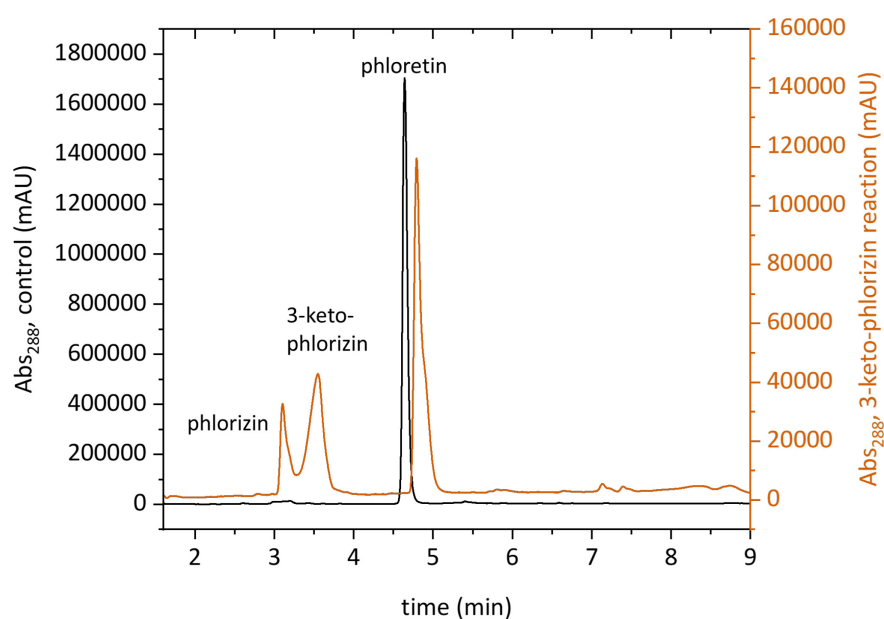

**Supplementary Figure 20.** HPLC chromatogram of an *AtOGE* (putative sugar phosphate isomerase/epimerase; WP\_003515232.1) catalyzed deglycosylation of 3-keto-phlorizin ( $n = 1$  individual experiment). Isolated 3-keto-phlorizin was dissolved in 10 mM potassium phosphate buffer (pH 7.0), the reaction was started with *AtOGE* (0.30 mg/mL) at 37 °C and agitation (650 rpm), quenched with MeCN and analyzed on HPLC. Besides the aglycone phloretin released from the substrate, unoxidized starting substrate phlorizin is visible. This is due to an incomplete reaction of GlycDH for 3-keto-phlorizin synthesis. Reaction products are shown as an orange trace, the phloretin standard is superimposed (black) and slightly shifted for clarity.

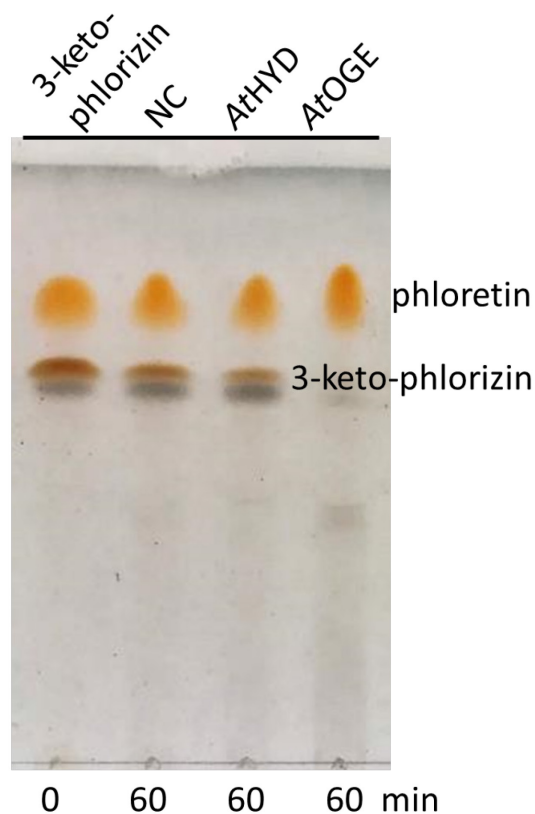

**Supplementary Figure 21.** TLC analysis of *AtOGE* and *AtHYD* (putative sugar phosphate isomerase/epimerase; WP\_038490972.1) catalyzed elimination of 3-keto-phlorizin ( $n = 1$  individual experiment). Negative control with no enzyme added (NC). Phloretin is present in each column due to spontaneous deglycosylation. As substrate, 10 mM of 3-keto-phlorizin were incubated with enzyme (0.30 mg/mL) in potassium phosphate buffer (10 mM; pH 7.0). Enzymes were pre-incubated with  $\text{MnCl}_2$  (1.0 mM) for 120 min at 4.0 °C. The reaction was incubated at 37 °C and 650 rpm for 60 min. Compounds were separated with a 9:1 mobile phase of MeCN and  $\text{H}_2\text{O}$ . A *p*-anisaldehyde based stain was used. Source data are provided as a Source Data file.

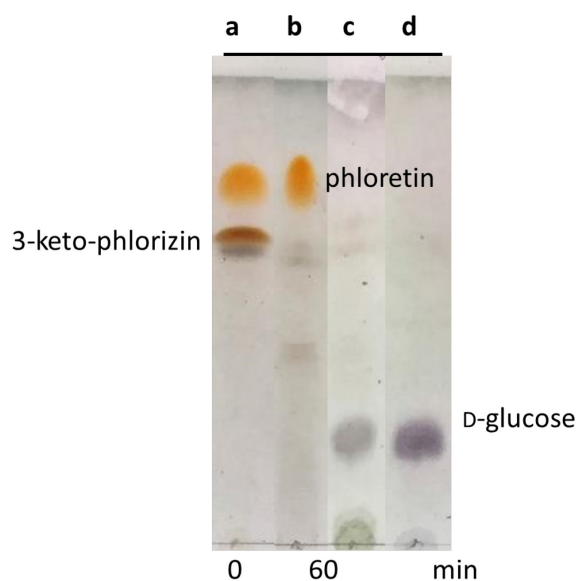

**Supplementary Figure 22.** TLC analysis of 3-keto-phlorizin conversion by enzymes of the glucoside degrading operon of *A. tumefaciens* (n = 1 individual experiment). Isolated 3-keto-phlorizin (2.0 mM) was used as starting substrate (**a**), incubation with *At*OGE yields phloretin (**b**). Incubation with *At*OGE, *At*HYD and Gfo oxidoreductase yields glucose (**c**). A glucose standard (10 mM) was used (**d**). All reactions were conducted in potassium phosphate buffer (10 mM; pH 7.0) at 37 °C under agitation (650 rpm) with 0.30 mg/mL of each enzyme. For reactions with Gfo oxidoreductase, 4.0 mM NADH were supplied. *At*OGE and *At*HYD were pre-incubated with MnCl<sub>2</sub> (1.0 mM; 120 min). Compounds were separated with a 9:1 mobile phase of MeCN with H<sub>2</sub>O and TLC plates were stained with a *p*-anisaldehyde based stain. Source data are provided as a Source Data file.

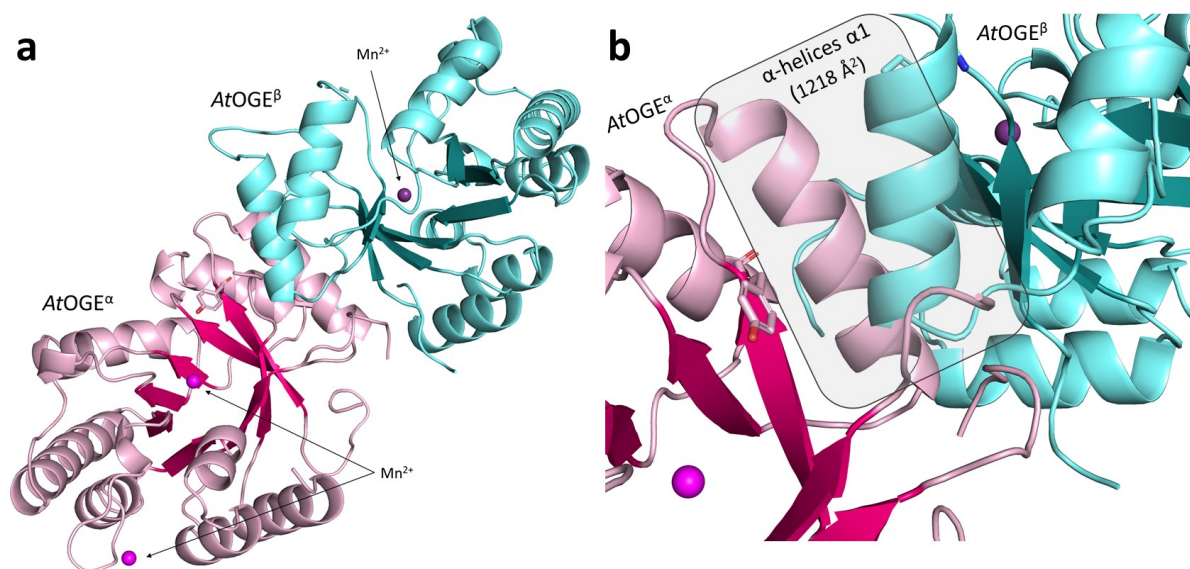

**Supplementary Figure 23.** *AtOGE* 2.0  $\text{\AA}$  crystal structure in full view (a) and zoomed into dimer interface (b). Chain A (subunit  $\alpha$ ) of putative homodimer is colored in pink, chain B (subunit  $\beta$ ) in cyan and metal ions ( $Mn^{2+}$ ) present in the crystallization buffer in purple.

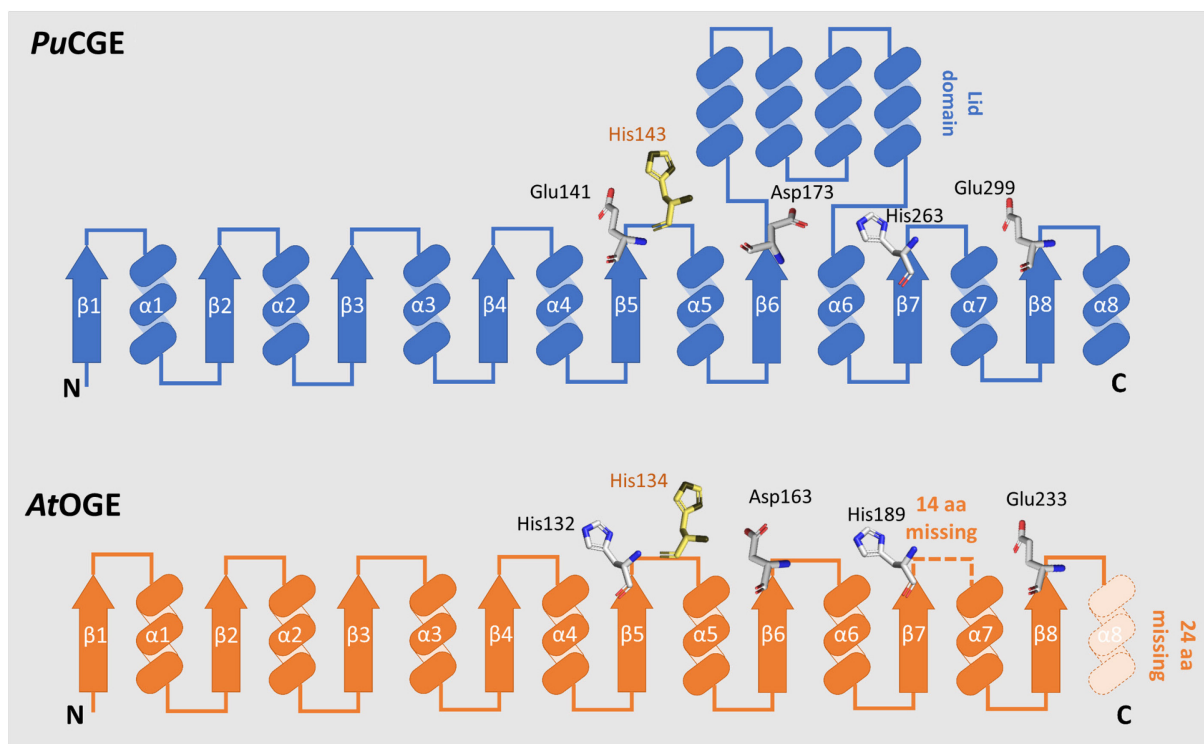

**Supplementary Figure 24.** Graphical representation of *PuCGE*<sup>8</sup> subunit  $\alpha$  and *AtOGE* secondary structures. Key residues are shown schematically at their secondary structure position.  $\text{Mn}^{2+}$ -coordinating residues are shown in grey, catalytic residues in yellow. *AtOGE* contains a short loop as similarly observed in the CGE from *Eubacterium cellulosolvens* (*EuCGE*)<sup>8</sup>. The loop is located in a flexible region between  $\beta 7$  and  $\alpha 7$  and unfortunately could not be modeled due to low electron density. Despite sharing a similar topology, the sequence similarity between *AtOGE* and *PuCGEs* is less than 30%.

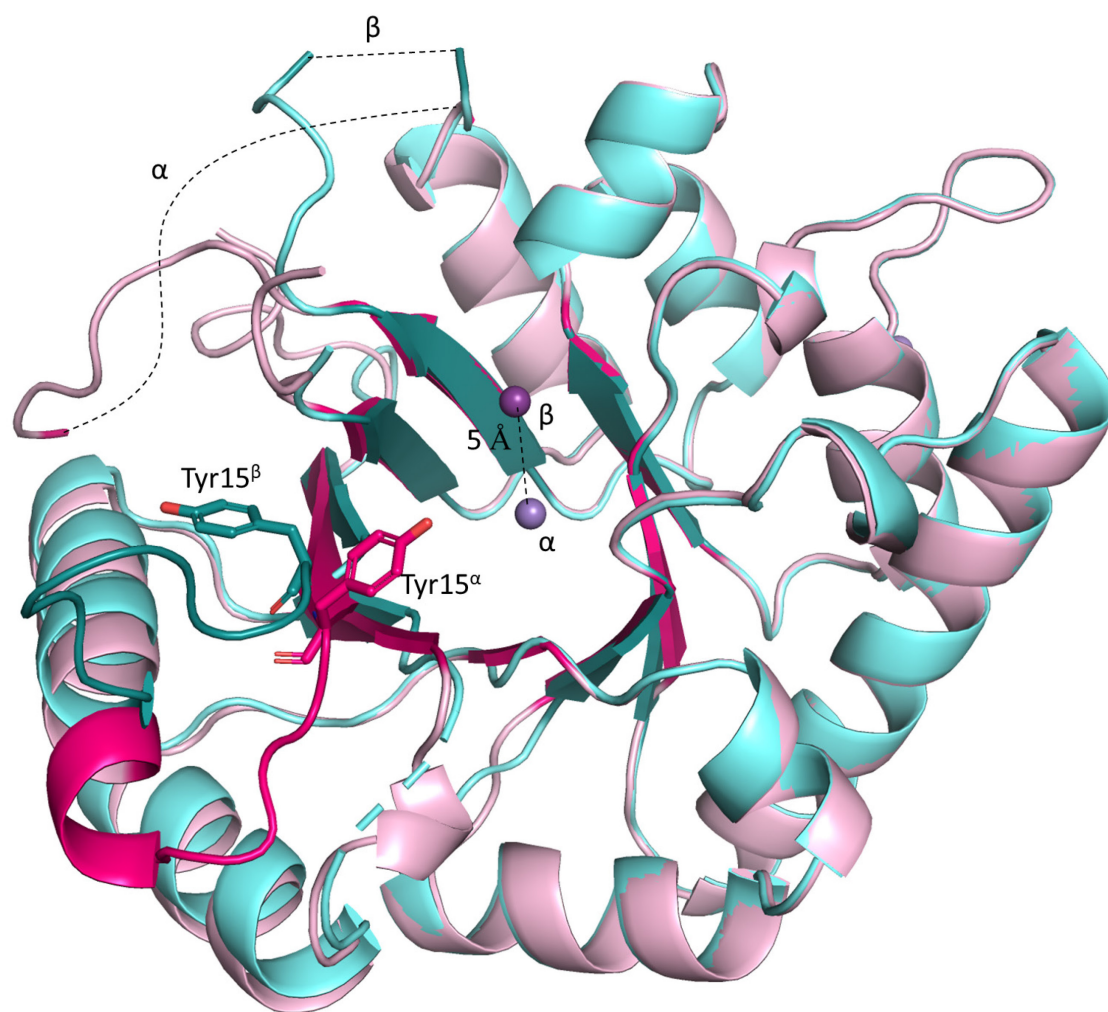

**Supplementary Figure 25.** Superposition of *AtOGE* subunit  $\alpha$  (magenta) and subunit  $\beta$  (cyan) with RMSD of 0.221 Å. Notable differences in the two subunits are: the position of the  $\text{Mn}^{2+}$  ion shown in in purple, the position of the loop (in saturated colors) adjacent to Tyr15, and the conformation of the missing loop between  $\beta$ 7 and  $\alpha$ 7 (dashed line; Thr198 – Gly211).



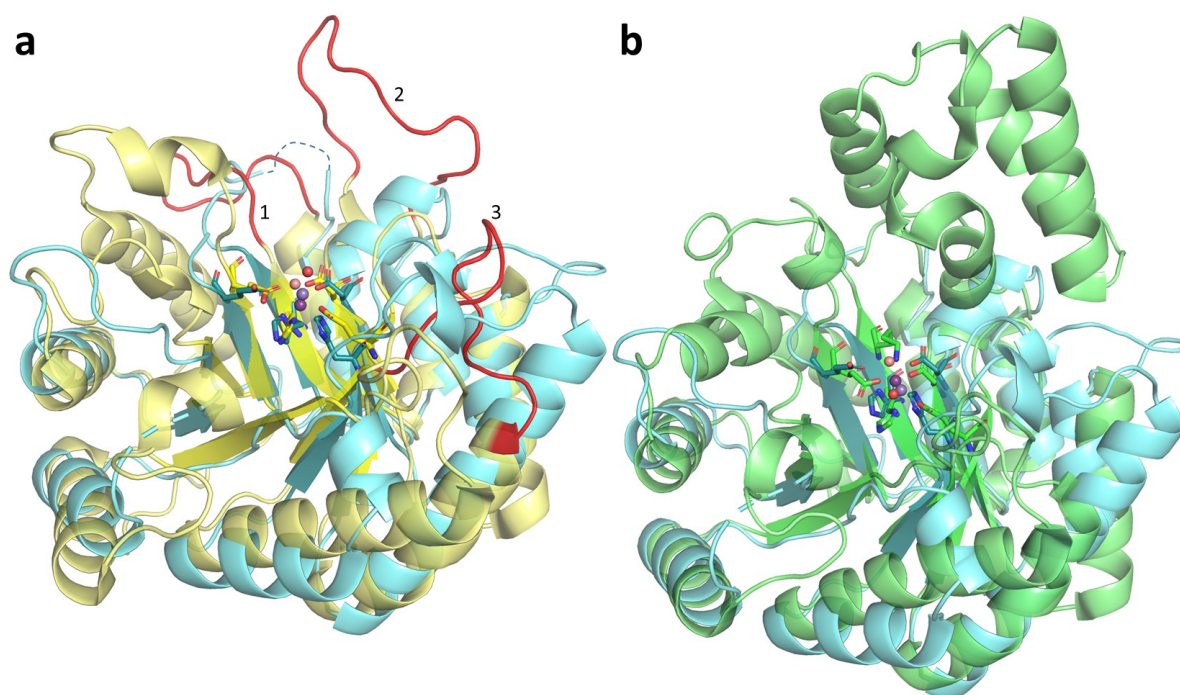

**Supplementary Figure 26.** Superposition of *AtOGE* and CGEs. Subunit  $\beta$  of *AtOGE* (cyan) is compared with subunit  $\alpha$  of CGEs from *E. cellulosolvens*<sup>8</sup> (yellow) (**a**) and *A. globiformis*<sup>8</sup> (green) (**b**).  $\text{Mn}^{2+}$  ion (purple),  $\text{Mn}^{2+}$  coordinating residues and water (red) are shown. In **a**, three possible loop systems (red) for forming the active site cavity of *E. cellulosolvens* are proposed.

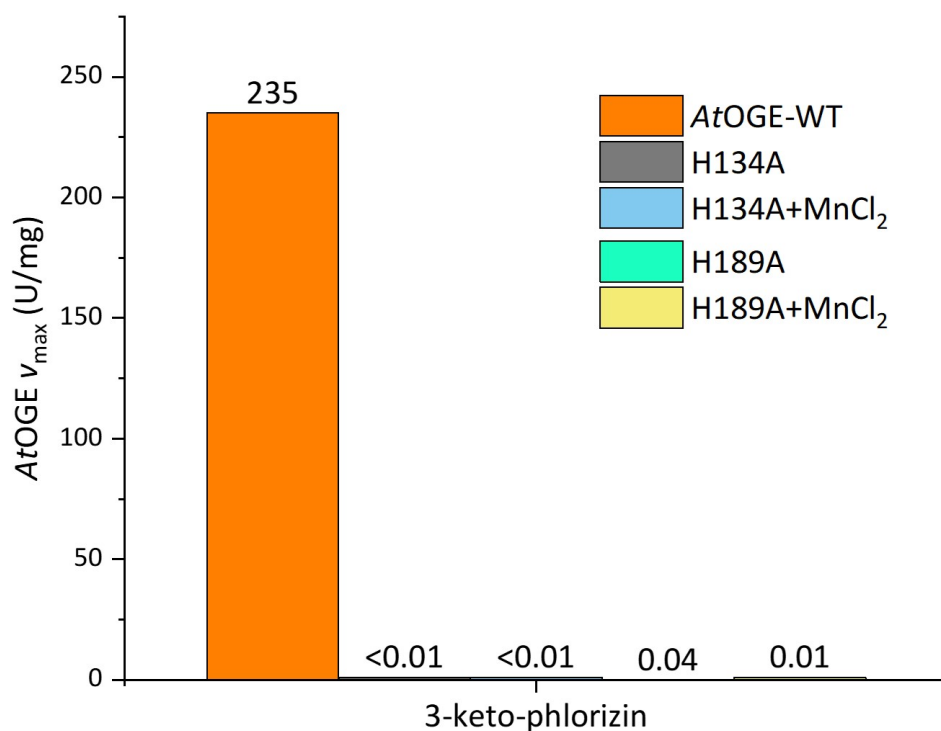

**Supplementary Figure 27.** *AtOGE* variants catalyzing 3-keto-phlorizin elimination and their comparison to the wildtype enzyme. Initial rates were determined in potassium phosphate buffer (10 mM, pH 6.0) containing 5.0% (v/v) DMSO and 2.40 mg/mL enzyme ( $n = 1$  individual experiment). Reactions were carried out at 37 °C and 650 rpm agitation for 60 min. In an attempt to saturate H189A and H134A mutant with metal cofactor, the enzyme was pre-incubated with MnCl<sub>2</sub> (5.0 mM) for 120 min at 4.0 °C prior to usage. Note that WT displays almost full activity (89%) without MnCl<sub>2</sub> preincubation (Supplementary Figure 40b). Samples were quenched with MeCN and analyzed on HPLC. WT rates are from initial rate measurements in Figure S39a. For further experimental details and for the analytical procedures used, see the Methods section of the main manuscript. Source data are provided as a Source Data file.

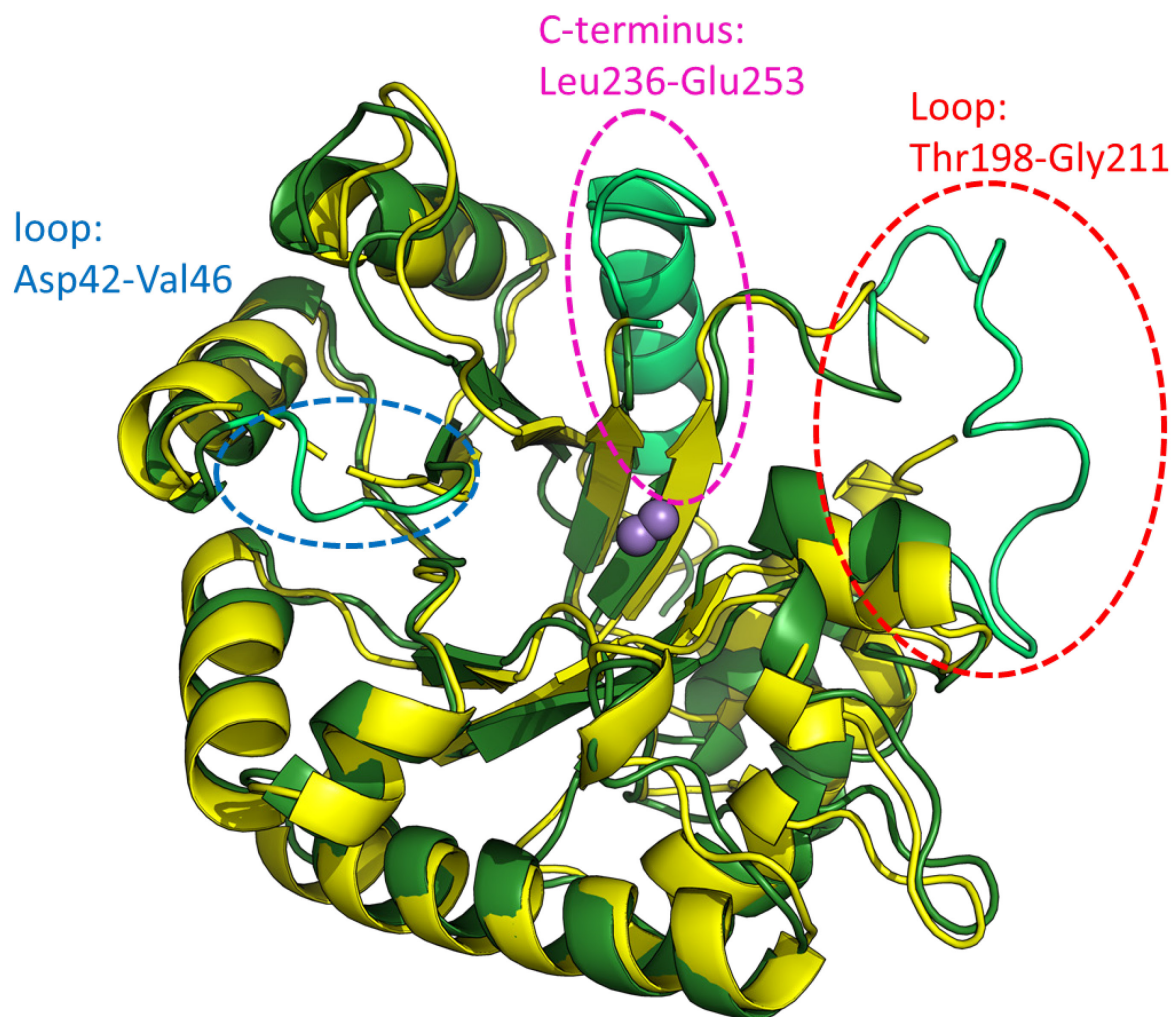

**Supplementary Figure 28.** Overlay of *AtOGE* crystal structure (yellow) and structure with modelled loops (green). The missing loop between Asp42–Val46 is highlighted by a blue circle, the loop between Thr198–Gly211 is highlighted by a red circle and the modelled C-terminus is highlighted by a purple circle.

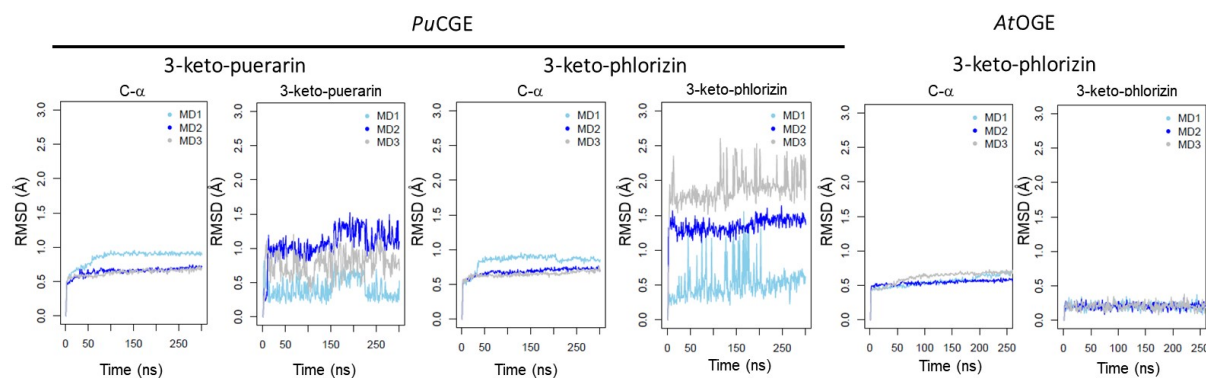

**Supplementary Figure 29.** RMSD values for enzyme and substrates during MD simulation. The main chain C- $\alpha$  atoms and substrate atoms were measured. The simulation was conducted three times ( $n = 3$  individual simulations) and represented by grey, blue, and cyan lines. The C- $\alpha$  traces indicate that the protein remained stable throughout the simulation. The Substrates have higher fluctuations as compared to the C- $\alpha$  atoms, but remain in the active site throughout the simulation. Source data are provided as a Source Data file.

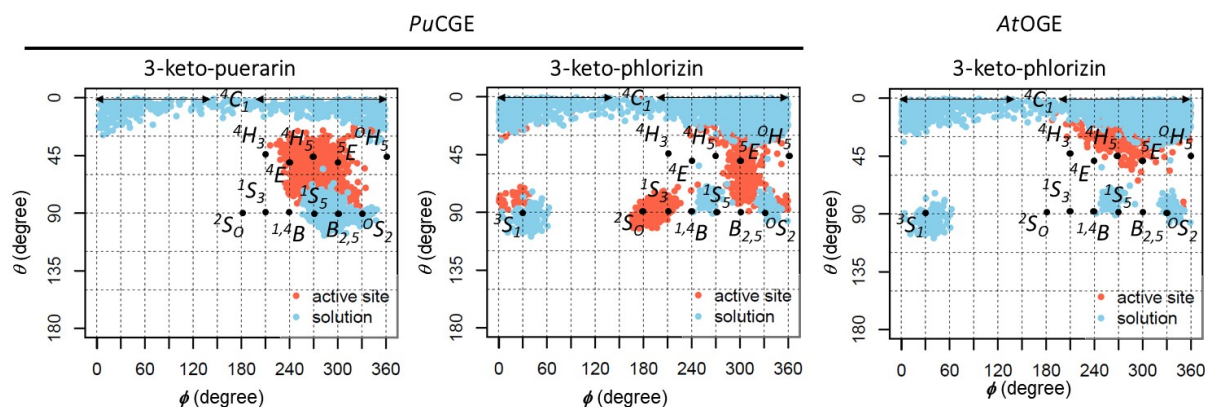

**Supplementary Figure 30.** Ring pucker analysis of the 3-keto-glycosyl moiety of 3-keto-puerarin and 3-keto-phlorizin in solution and in the active site of *PuCGE* and *AtOGE*. To evaluate the effect of the active site environment on the sugar ring puckering, two simulations of the ligand in water were performed and compared to those performed with the enzyme-ligand complexes. Ring pucker analyses were performed using the Cremer-Pople puckering descriptors Q, theta and phi. All simulations were performed on the force field level of theory. For further details, consult the Docking and molecular dynamics simulations sections in described in the methods. Source data are provided as a Source Data file.

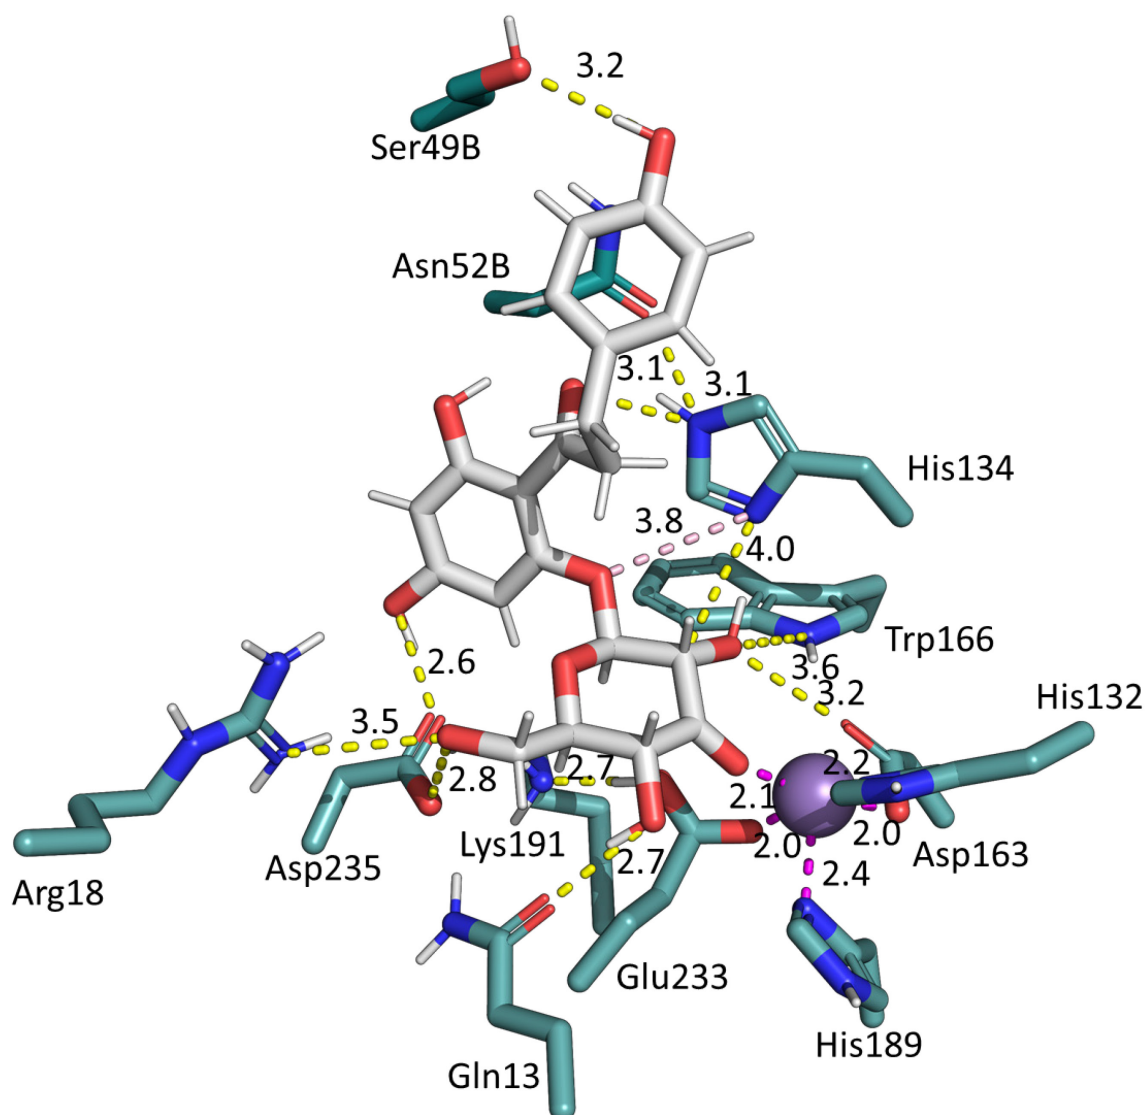

**Supplementary Figure 31.** MD-refined binding mode of 3-keto-phlorizin (C-atoms in white) to the active site of *AtOGE*. A representative structure was selected from the most populated cluster of conformers out of three simulations ( $n = 3$  individual experiments). Clustering was achieved using the hierarchical agglomerative (bottom-up) algorithm. All polar interactions between substrate and enzyme are shown. Dashed lines show interactions: hydrogen bonds in yellow; interactions with  $\text{Mn}^{2+}$  in magenta; and distance (in Å) between the catalytic base (*AtOGE*: H134) and the glycosidic oxygen in light pink.

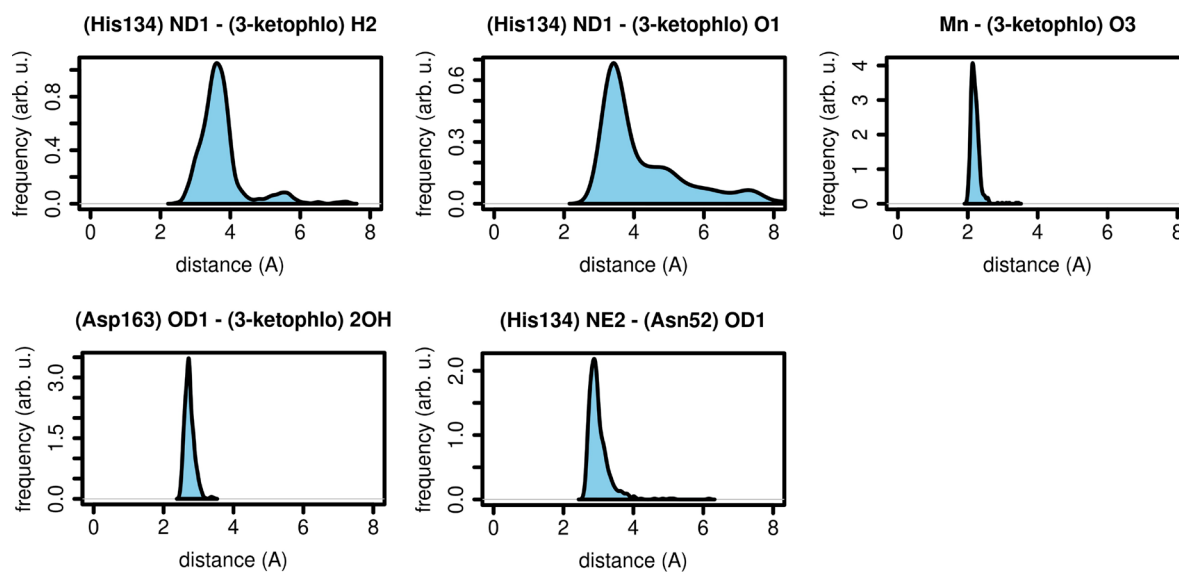

**Supplementary Figure 32.** Catalytically relevant interatomic distances in the active site of *AtOGE* in complex with 3-keto-phlorizin. 3-ketophlo = 3-keto-phlorizin; Plots show the distance distribution observed during MD simulations ( $n = 3$  individual simulations), the frequency is given as arbitrary units (arb. u.) and distances are given in Å. Source data are provided as a Source Data file.



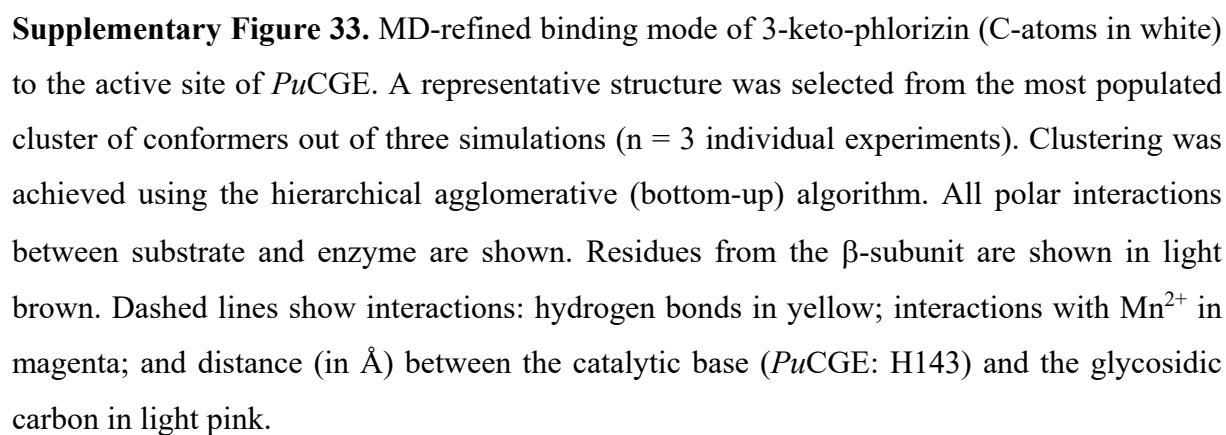



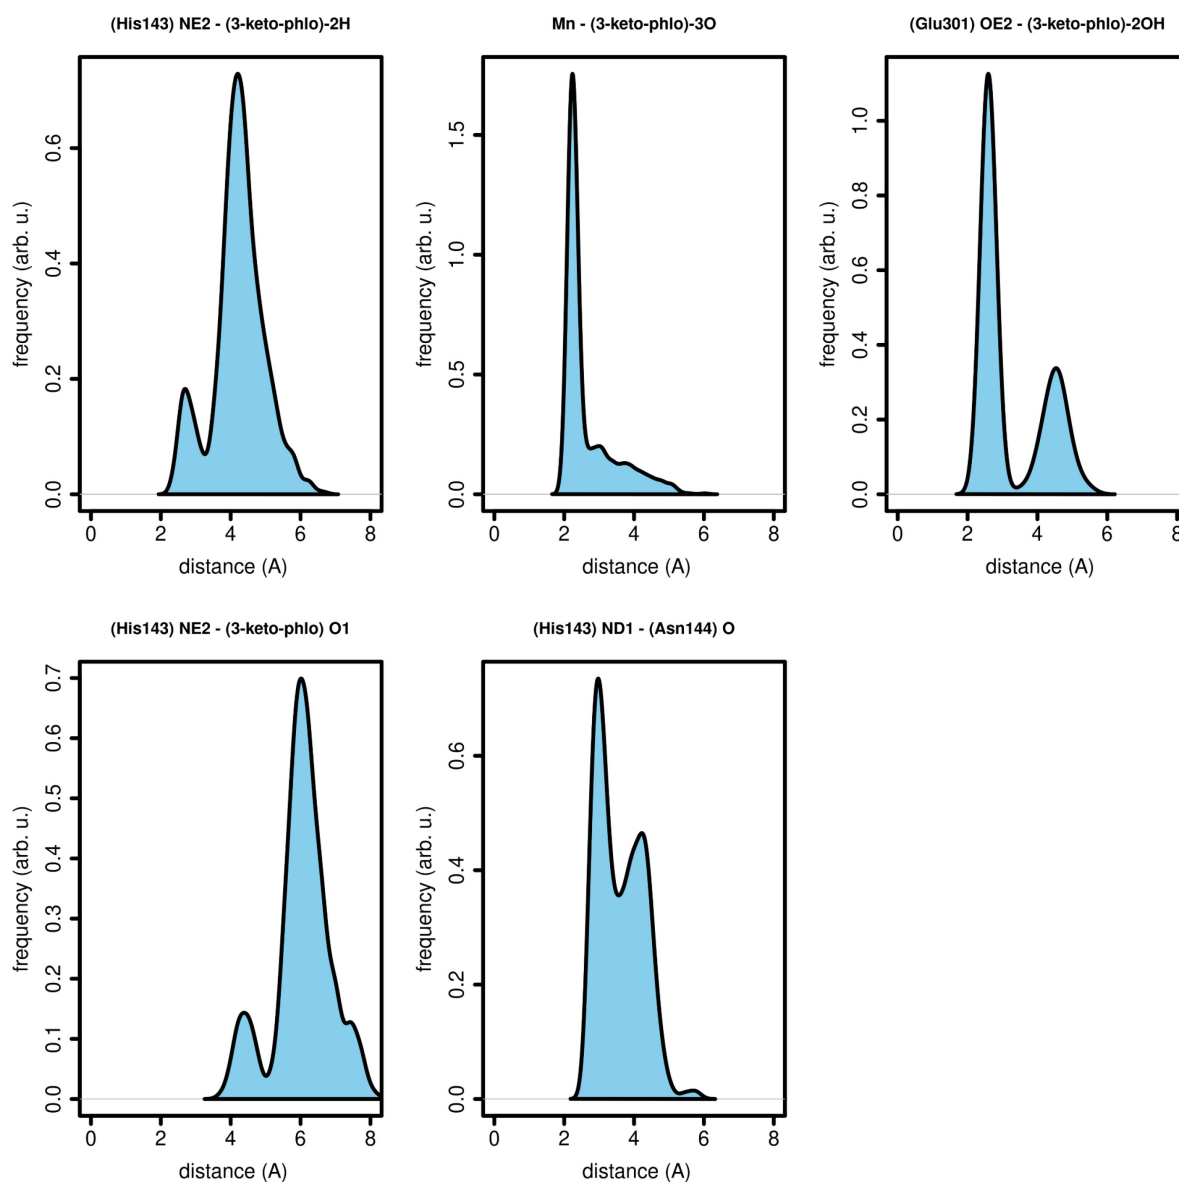

**Supplementary Figure 34.** Catalytically relevant interatomic distances in the active site of *PuCGE* in complex with 3-keto-phlorizin. 3-keto-phlo = 3-keto-phlorizin; Plots show the distance distribution observed during MD simulations ( $n = 3$  individual simulations), the frequency is given as arbitrary units (arb. u.) and distances are given in Å. Source data are provided as a Source Data file.



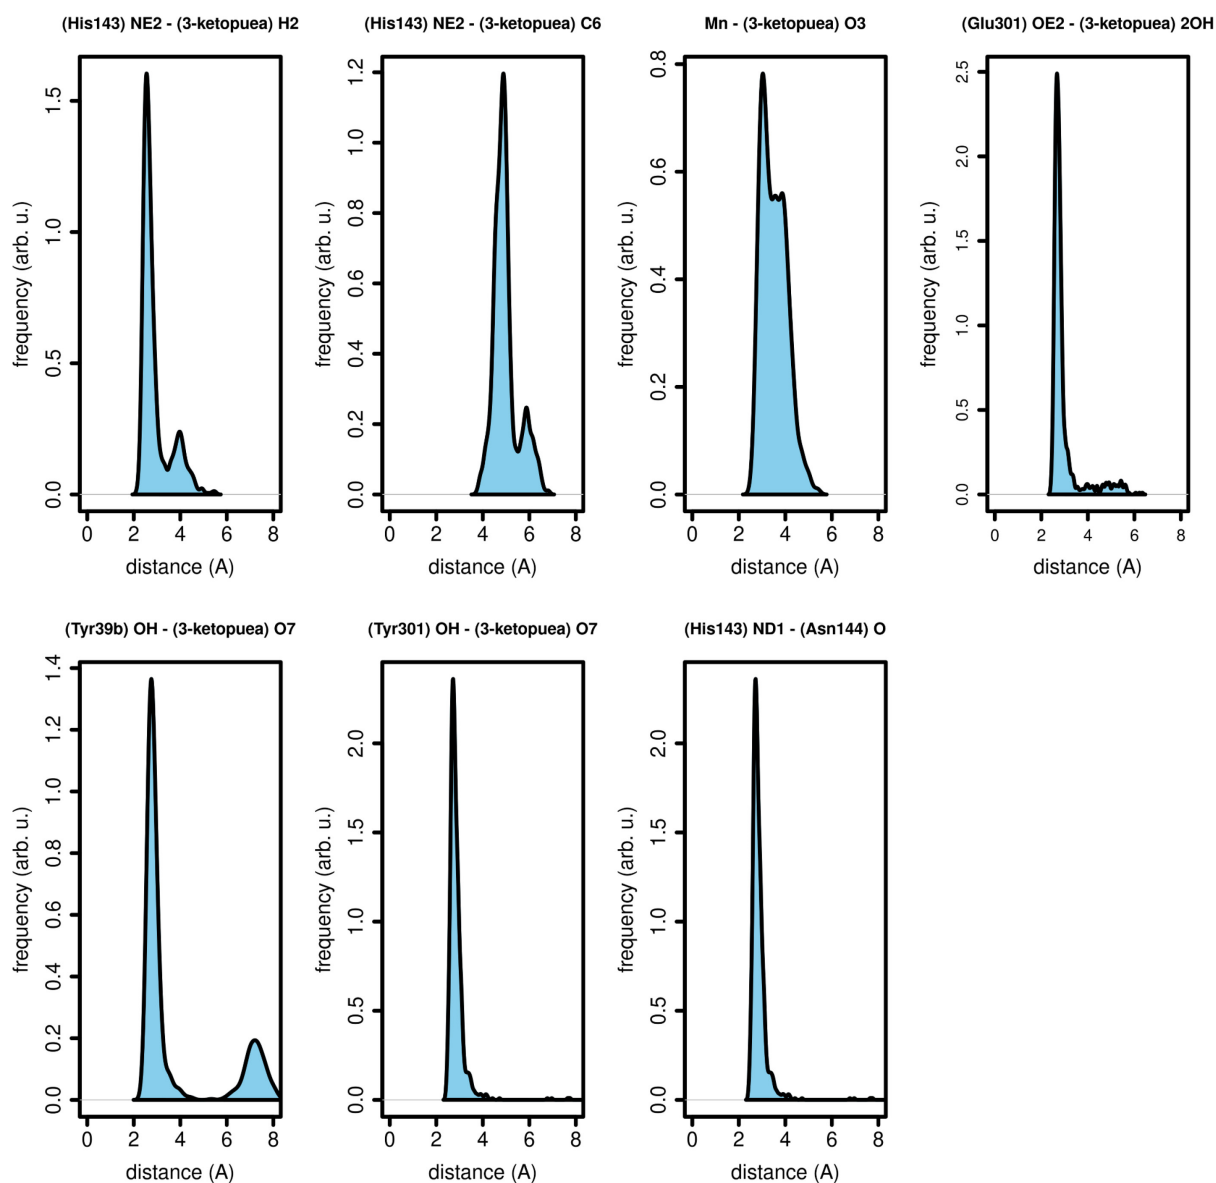

**Supplementary Figure 36.** Catalytically relevant interatomic distances in the active site of *PuCGE* in complex with 3-keto-puerarin. 3-ketopuea = 3-keto-puerarin; Plots show the distance distribution observed during MD simulations ( $n = 3$  individual simulations), the frequency is given as arbitrary units (arb. u.) and distances are given in Å. Source data are provided as a Source Data file.

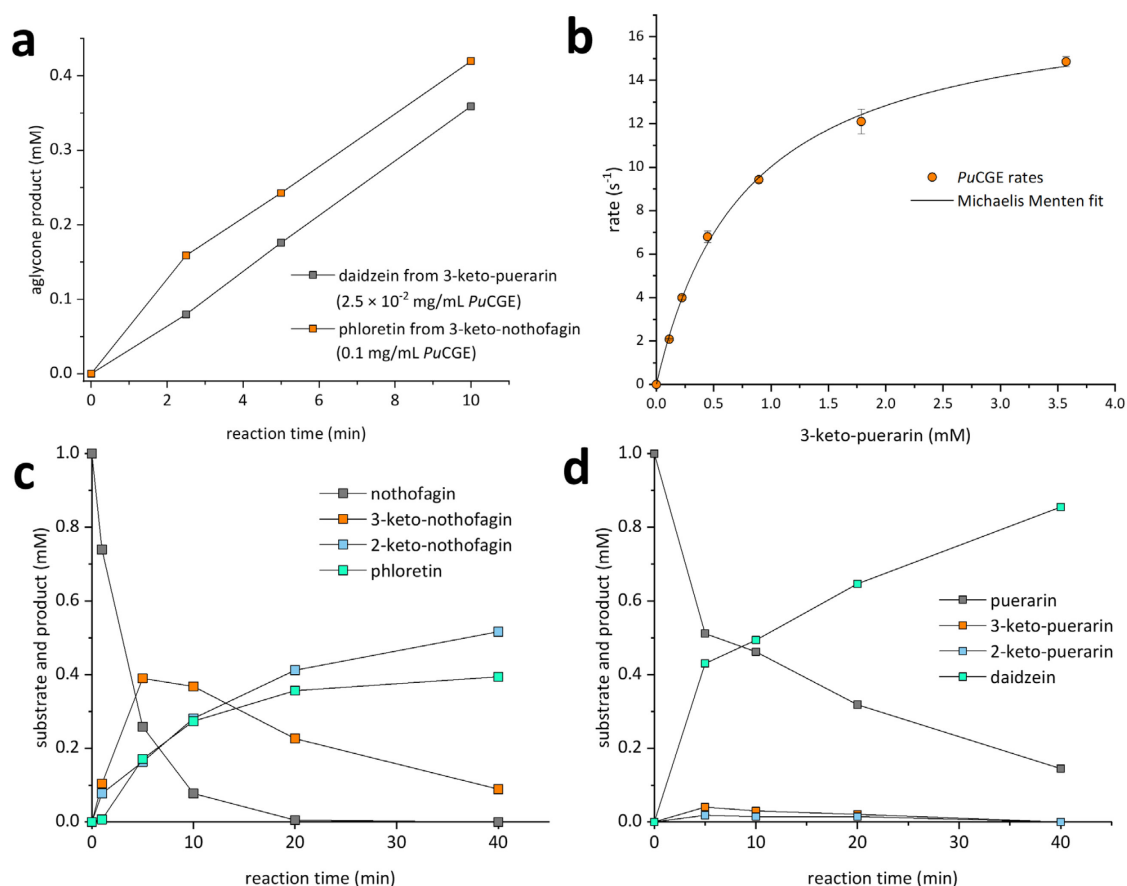

**Supplementary Figure 37.** *PuCGE*-catalyzed elimination of keto-*C*-glycosides puerarin (**a**, **b**, **d**) and nothofagin (**a**, **c**). For single enzyme reactions **a** and **b**, C3 oxidized substrate was dissolved in potassium phosphate buffer (10 mM, pH 6.0, 5.0% DMSO) and incubated with *PuCGE*, which was previously incubated with  $MnCl_2$  (5.0 mM, 120 min). For one-pot reactions **c** and **d** substrate (1.0 mM) conditions were the same except  $K_3[Fe(CN)_6]$  (8.0 mM), GlycDH (0.10 mg/mL) and preincubated *PuCGE* (0.10 mg/mL) were added. All reactions were carried out at 37 °C and agitation (650 rpm). Samples were quenched with MeCN and analyzed by HPLC. Initial rates for the Michaelis Menten plot (**b**) were determined with  $2.50 \times 10^{-2}$  mg/mL of *PuCGE* and 0.1–3.6 mM of 3-keto-puerarin and fitted to equation 2 using Origin software. The fit is shown as a solid line with S.D. indicated by error bars. ( $n = 1$  individual experiment for **a**, **c** and **d**;  $n = 3$  individual experiments for **b**). For further experimental details and for the analytical procedures used, see the Methods section of the main manuscript. Source data are provided as a Source Data file.

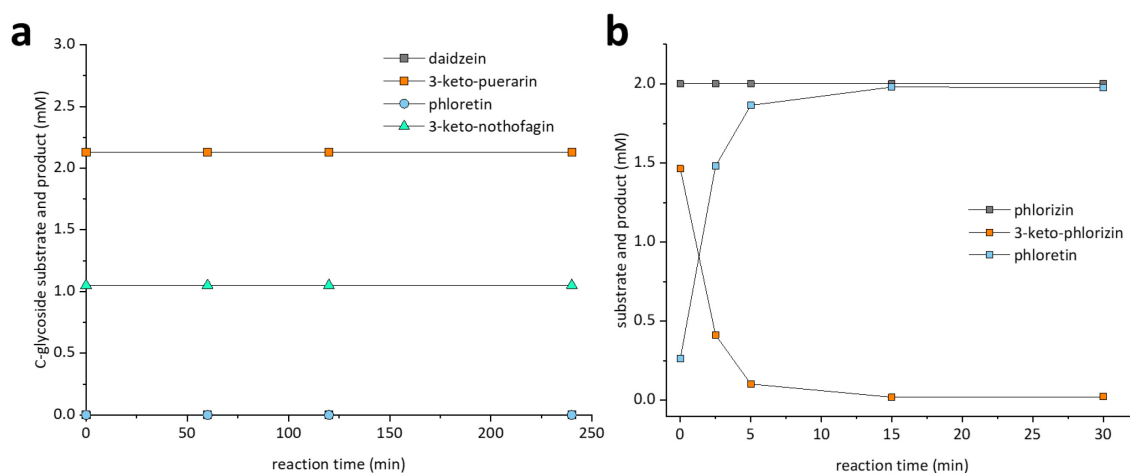

**Supplementary Figure 38.** Time courses of *AtOGE*-catalyzed elimination of oxidized *C*-glycoside and oxidized/unoxidized *O*-glycoside substrates. **a.** 3-keto-puerarin and 3-keto-nothofagin. **b.** phlorizin and 3-keto-phlorizin. Initial rates were determined in potassium phosphate buffer (10 mM, pH 6.0, 5.0% (v/v) DMSO) with 0.50 mg/mL *AtOGE* (preincubated with 5.0 mM  $\text{MnCl}_2$  at 4.0 °C for 120 min) or  $5.00 \times 10^{-3}$  mg/mL for the 3-keto-phlorizin positive control (**b**). Reactions were carried out at 37 °C and agitation (650 rpm). Samples were quenched in MeCN and analyzed by HPLC ( $n = 1$  individual experiment). For further experimental details and for the analytical procedures used, see the Methods section of the main manuscript. Source data are provided as a Source Data file.

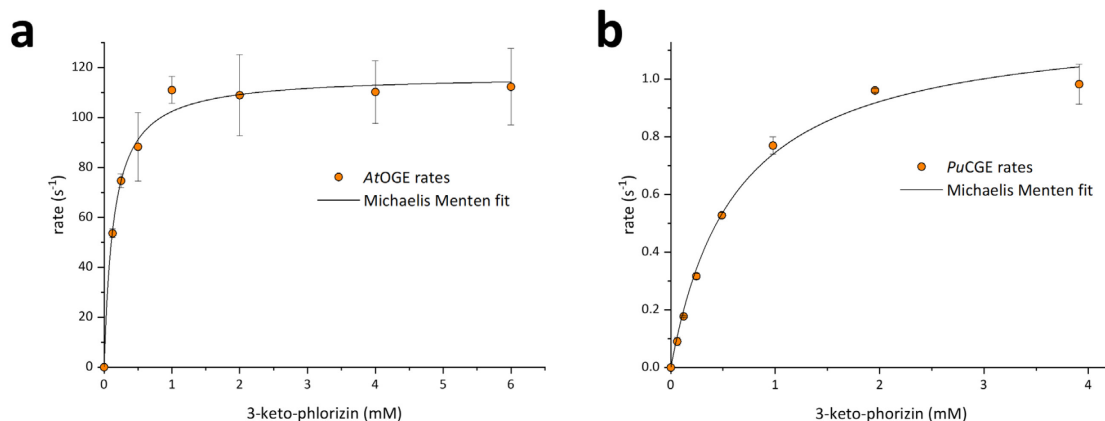

**Supplementary Figure 39.** Kinetic analysis of OGE- and CGE-catalyzed elimination of 3-keto-phlorizin. **a.** Kinetic analysis of *AtOGE* ( $2.00 \times 10^{-4}$  mg/mL) or **b.** *PuCGE* (0.05 mg/mL) with 3-keto-phlorizin (0.0–6.0 and 0.0–4.0 mM, respectively). Potassium phosphate buffer (10 mM, pH 6.0) was used and reactions were incubated at 37 °C and agitation (650 rpm). Samples were quenched in MeCN and analyzed on HPLC ( $n = 3$  individual experiments). Initial rates were fitted to the Michaelis Menten (equation 2) using Origin software. The fit is shown as a solid line with S.D. indicated by error bars. For further experimental details and for the analytical procedures used, see the Methods section of the main manuscript. Source data are provided as a Source Data file.

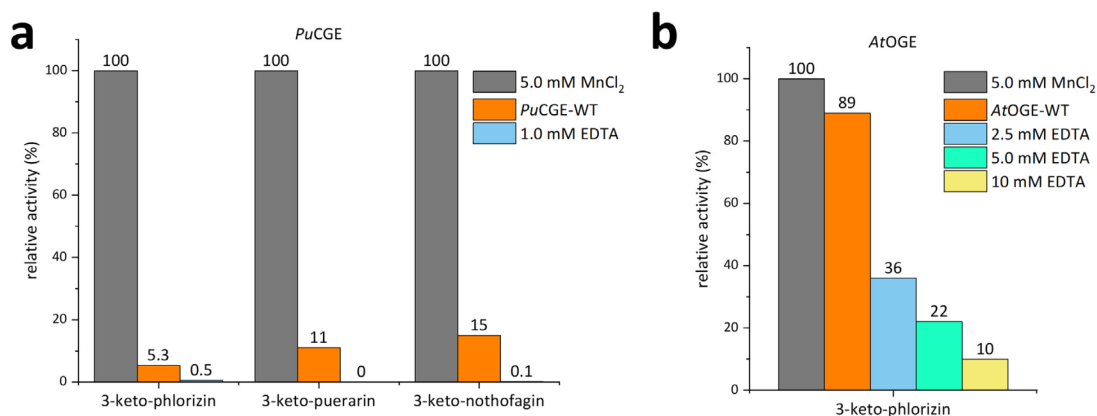

**Supplementary Figure 40.** Relative activity of **a.** *PuCGE*- and **b.** *AtOGE* in deglycosylation reactions of *O*- and *C*-glycosides in metal-chelating conditions. Relative activity was gained from dividing the specific activity of reactions by rates from reactions supplemented with MnCl<sub>2</sub>. Enzymes were either used directly (WT), or preincubated with 5.0 mM MnCl<sub>2</sub> or in the persence of 1.0–10 mM EDTA, at 4.0 °C for 120 min. Reactions were conducted at 37 °C in potassium phosphate buffer (10 mM; pH 6.0; 5.0% DMSO) containing 2.0 mM substrate and 0.01 mg/mL of *AtOGE* or 0.05 mg/mL of *PuCGE* for 3-keto-puerarin and 0.10 mg/mL for both 3-keto-phlorizin and -nothofagin. Samples were quenched with MeCN and analyzed by HPLC (n = 1 individual experiment). For further experimental details and for the analytical procedures used, see the Methods section of the main manuscript. Source data are provided as a Source Data file.

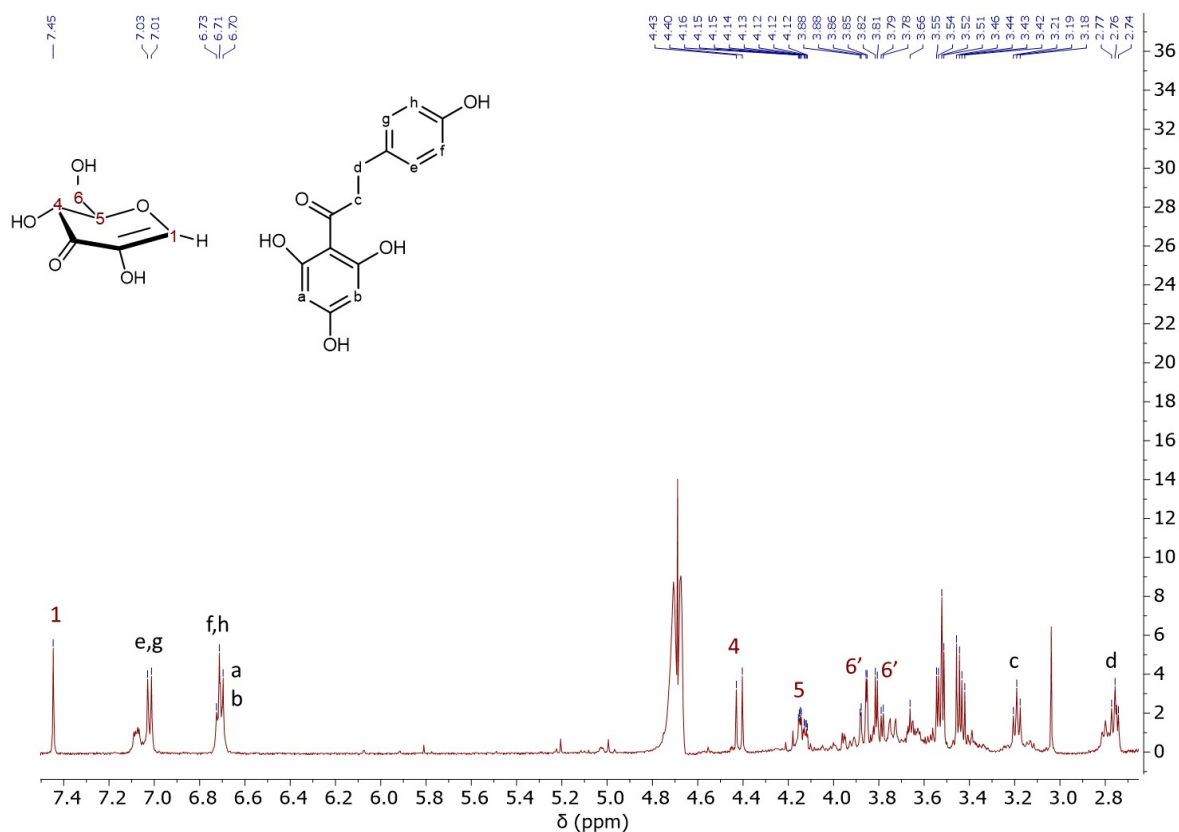

**Supplementary Figure 41.** <sup>1</sup>H NMR spectrum of products from *AtOGE* reaction with 3-ketophlorizin resulting in 3-keto-glucal and phloretin (500 MHz, 10% DMSO-d<sub>6</sub>, D<sub>2</sub>O): δ 7.45 (s, 1H, H-1), 7.02 (d, *J* = 8.5 Hz, 2H, H-e and H-g), 6.72 (d, *J* = 6.0 Hz, 2H, H-f and H-h), 6.70 (s, 2H, H-a and H-b), 4.42 (d, *J* = 13.3 Hz, 1H, H-4), 4.14 (m, *J* = 13.2, 4.4, 2.2 Hz, 1H, H-5), 3.87 (dd, *J* = 13.0, 2.4 Hz, 1H, H-6), 3.80 (dd, *J* = 12.9, 4.5 Hz, 1H, H-6), 3.65–3.42 (m, Glycerol) 3.19 (t, *J* = 7.6 Hz, 2H, H-c), 2.76 (t, *J* = 7.5 Hz, 2H, H-d). Minor impurities of glycerol are visible (3.67–3.42 ppm).



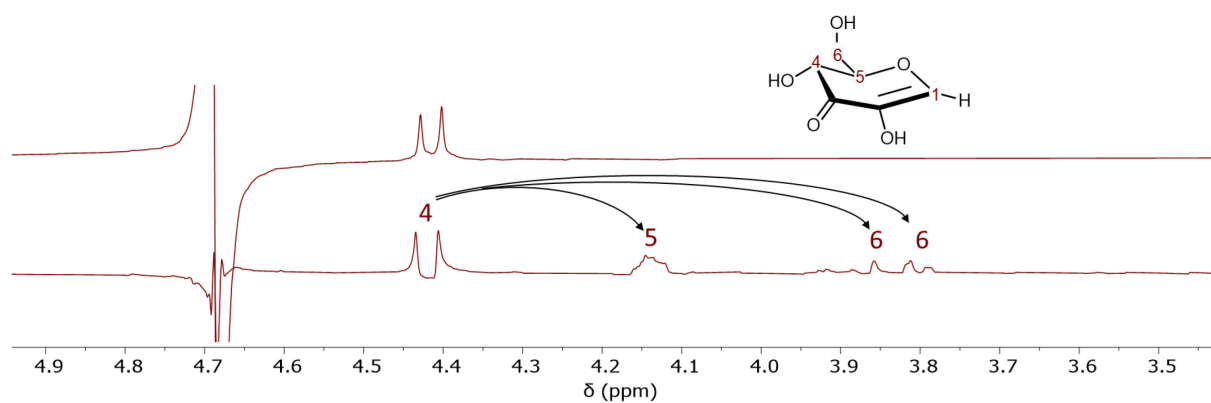

**Supplementary Figure 42.** TOCSY analysis from 2-hydroxy-3-keto-glucal product of *At*OGE-catalyzed 3-keto-phlorizin deglycosylation (500 MHz, 10% DMSO- $d_6$ ,  $D_2O$ ). Selective band center: 4.41 (ppm); width: 34.5 (Hz). Correlation between H-4, H-5, H6 and H6 as one spin system are displayed.

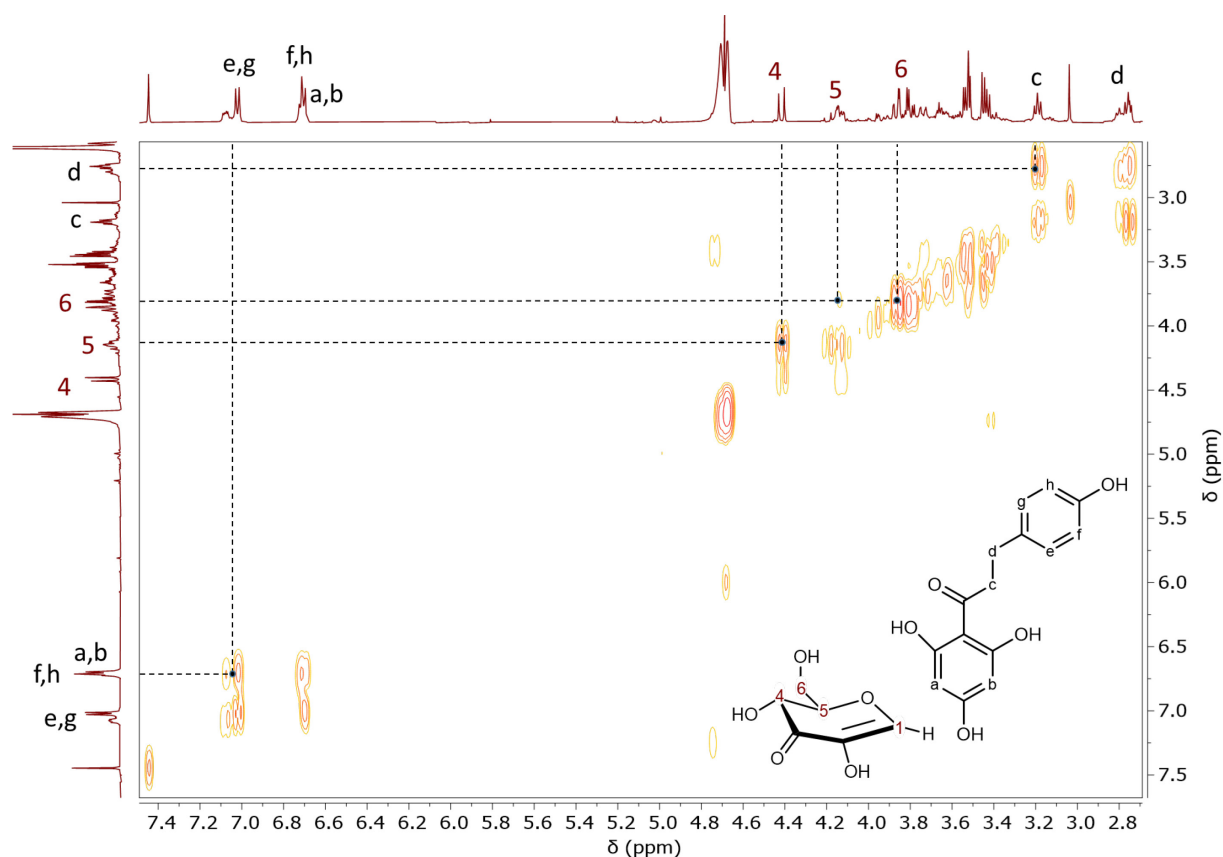

**Supplementary Figure 43.** COSY analysis of products from *At*OGE reaction with 3-keto-phlorizin resulting in 2-hydroxy-3-keto-glucal and phloretin (500 MHz, 10% DMSO-d<sub>6</sub>, D<sub>2</sub>O). 2D-NMR shows proton coupling of H-e and H-g with H-f and H-h, H-4 with H-5, H-5 with H-6, H-6 with H-6, H-c with H-d.

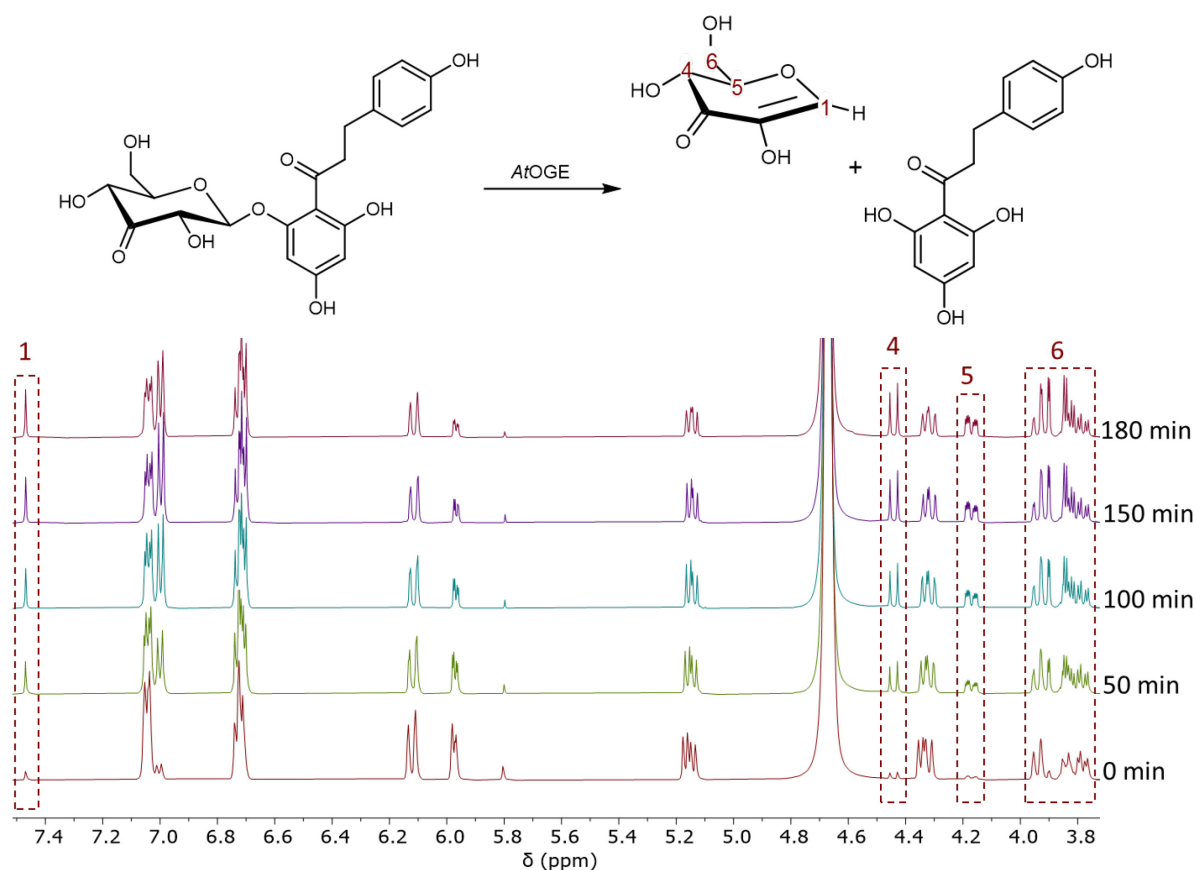

**Supplementary Figure 44.** In situ  $^1\text{H}$  NMR analysis of *AtOGE* reaction with 3-keto-phlorizin. The reaction results in 2-hydroxy-3-keto-glucal and phloretin (500 MHz, 10% DMSO- $d_6$ , 50 mM potassium phosphate buffer in  $\text{D}_2\text{O}$  (pD 7.4)). The proton signals from the sugar product 2-hydroxy-3-keto-glucal are framed and labelled in red. The reaction was measured over a time course of 180 min. For further experimental details and for the analytical procedures used, see the Methods section of the main manuscript.

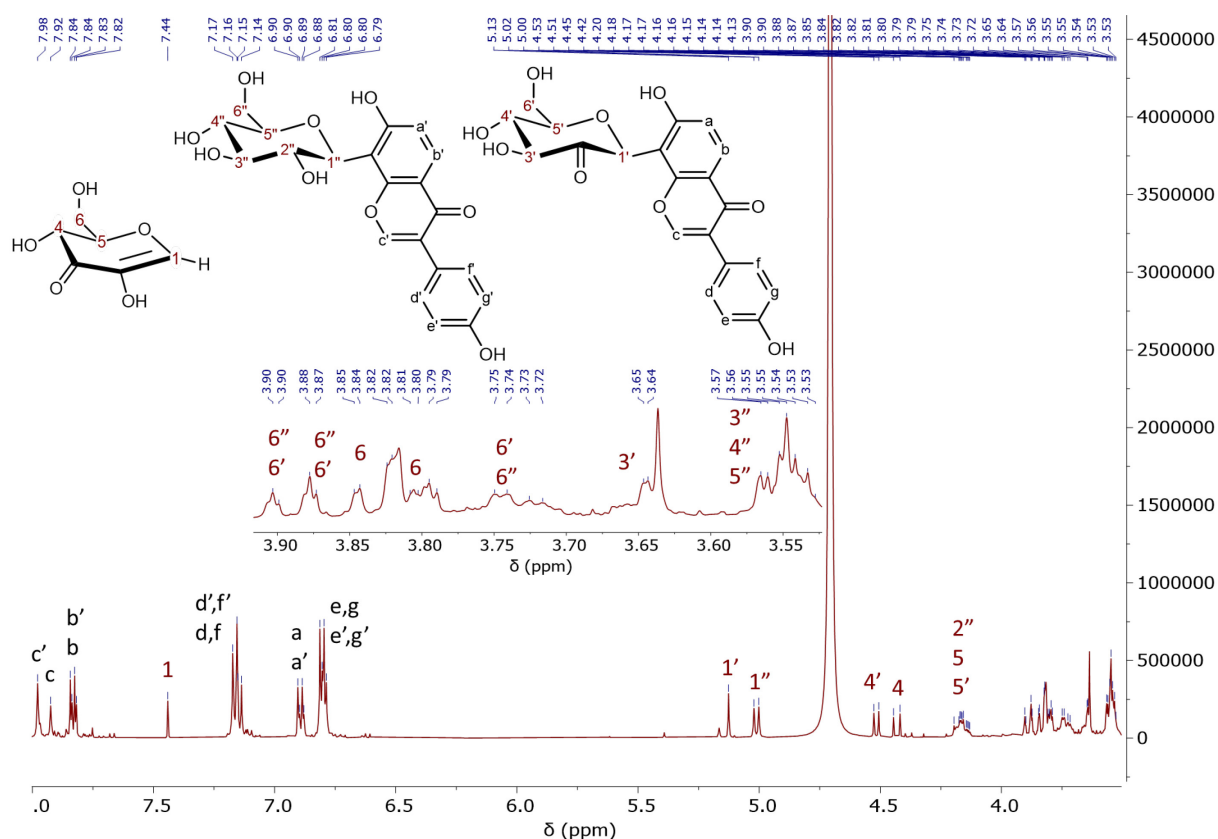

**Supplementary Figure 45.**  $^1\text{H}$  NMR spectrum of product from PuCGE reaction with 2-/3-keto-puerarin resulting in 2-hydroxy-3-keto-glucal and daidzein (not dissolved in the sample) with residuals of 2-keto-puerarin and puerarin due to incomplete conversion (500 MHz, 10% DMSO- $d_6$ ,  $D_2O$ ):  $\delta$  7.98 (s, 1H, H- $c'$ ), 7.92 (s, 1H, H- $c$ ), 7.83 (d,  $J$  = 8.9 Hz, 1H, H- $b'$ ), 7.83 (d,  $J$  = 8.9 Hz, 1H, H- $b$ ), 7.44 (s, 1H, H-1), 7.16 (d,  $J$  = 8.8 Hz, 2H, H- $d'$  and H- $f'$ ), 7.14 (d,  $J$  = 7.6 Hz, 2H, H- $d$  and H- $f$ ), 6.90 (d,  $J$  = 9.0 Hz, 1H, H- $a'$ ), 6.89 (d,  $J$  = 9.0 Hz, 1H, H- $a$ ), 6.80 (d,  $J$  = 8.6 Hz, 2H, H- $e'$  and H- $g'$ ), 6.80 (d,  $J$  = 8.6 Hz, 2H, H- $e$  and H- $g$ ), 5.13 (s, 1H, H-1'), 5.01 (d,  $J$  = 10.0 Hz, 1H, H-1''), 4.52 (d,  $J$  = 10.1 Hz, 1H, H-4'), 4.43 (d,  $J$  = 13.4 Hz, 1H, H-4), 4.19 (d,  $J$  = 10.2 Hz, 1H, H-2''), 4.15 (m,  $J$  = 13.3, 4.5, 2.3 Hz, 2H, H-5 and H-5'), 3.89 (dd,  $J$  = 12.9, 2.2 Hz, 2H, H-6'' and H-6'), 3.83 (dd,  $J$  = 11.2, 1.9 Hz, 1H, H-6), 3.83–3.77 (m, 1H, H-6), 3.73 (dd,  $J$  = 12.1, 4.5 Hz, 2H, H-6'' and H-6'), 3.64 (d,  $J$  = 10.0 Hz, 1H, H-3'), 3.59–3.51 (m, 3H, H-3'', H-4'' and H-5'')

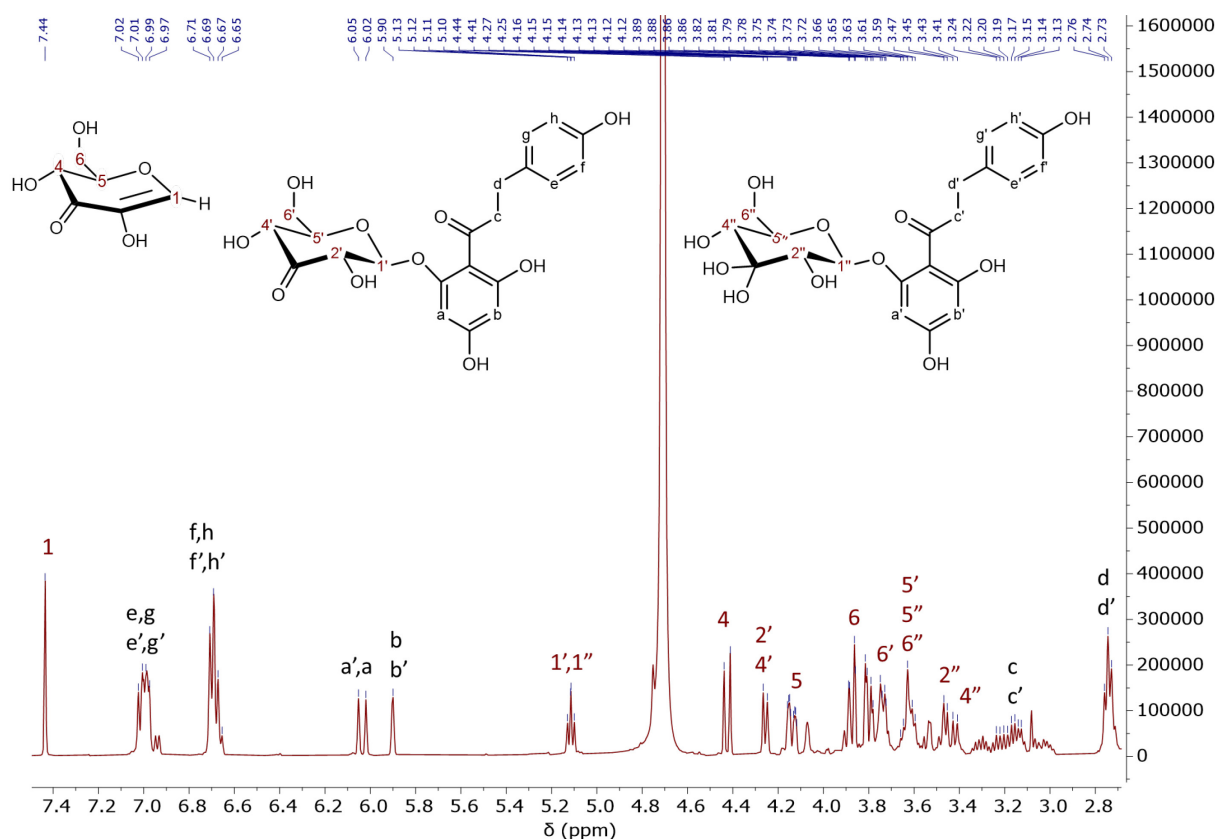

**Supplementary Figure 46.**  $^1\text{H}$  NMR spectrum of products from *PuCGE* reaction with 3-ketophlorizin resulting in 2-hydroxy-3-keto-glucal and phloretin (not dissolved in the sample) as well as 3-ketophlorizin and 3-diol-phlorizin due to incomplete conversion (500 MHz, 10% DMSO- $d_6$ ,  $\text{D}_2\text{O}$ ):  $\delta$  7.44 (s, 1H, H-1), 7.02 (d,  $J = 8.9$  Hz, 2H, H-e and H-g), 6.98 (d,  $J = 8.1$  Hz, 2H, H-e' and H-g'), 6.70 (d,  $J = 8.5$  Hz, 2H, H-f' and H-h'), 6.66 (d,  $J = 9.0$  Hz, 2H, H-f and H-h), 6.05 (s, 1H, H-a'), 6.02 (s, 1H, H-a), 5.90 (s, 2H, H-b and H-b'), 5.12 (d,  $J = 6.9$  Hz, 1H, H-1'), 5.11 (d,  $J = 7.4$  Hz, 1H, H-1''), 4.42 (d,  $J = 13.8$  Hz, 1H, H-4), 4.26 (d,  $J = 9.0$  Hz, 2H, H-2' and H-4'), 4.14 (m,  $J = 13.4, 4.5, 2.3$  Hz, 1H, H-5), 3.87 (dd,  $J = 12.7, 2.3$  Hz, 1H, H-6), 3.80 (dd,  $J = 12.8, 4.3$  Hz, 1H, H-6), 3.74 (dd,  $J = 9.1, 3.4$  Hz, 1H, H-6'), 3.68–3.58 (m, 3H, H-5', H-5'' and H-6''), 3.46 (d,  $J = 7.6$  Hz, 1H, H-2''), 3.42 (d,  $J = 9.6$ , 1H, H-4''), 3.21–3.10 (m, 4H, H-c and H-c'), 2.74 (t, 4H, H-d and H-d')

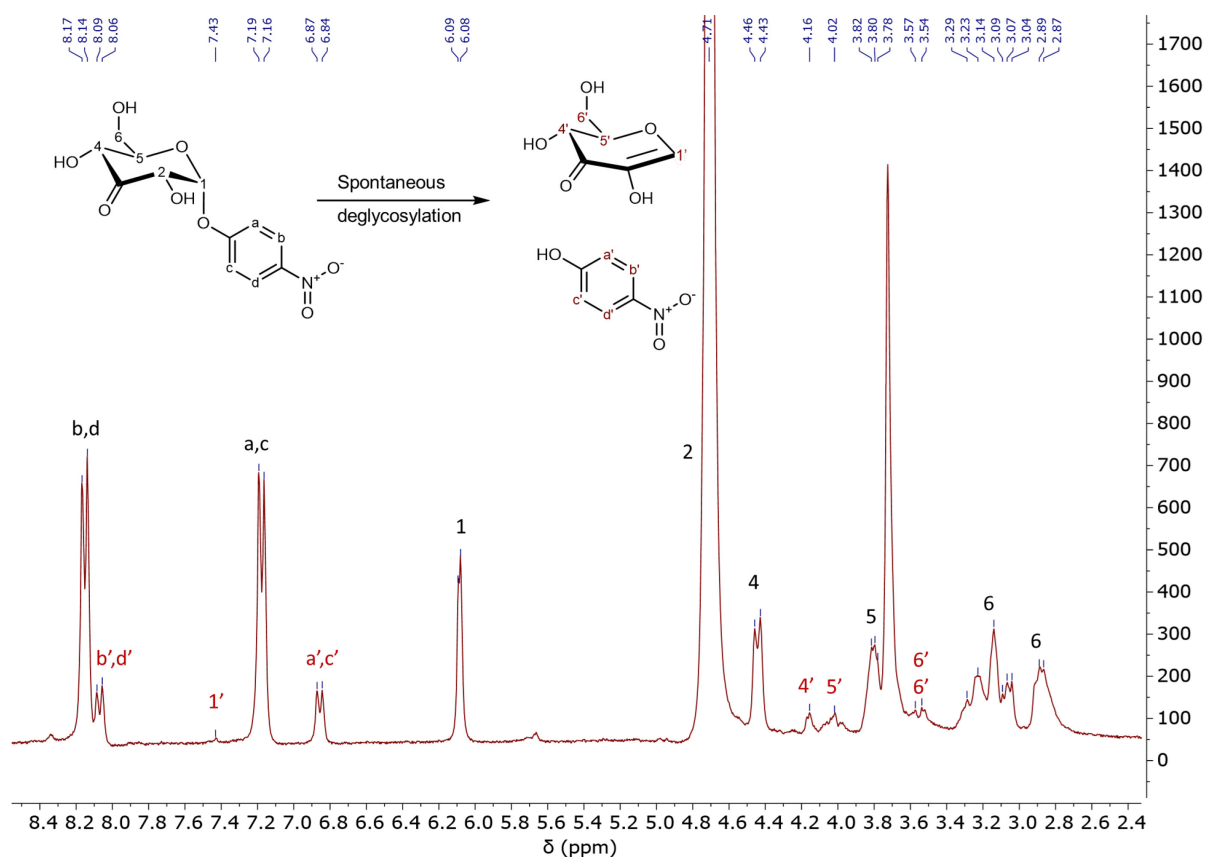

**Supplementary Figure 47.**  $^1\text{H}$  NMR spectrum of 4-nitrophenyl  $\alpha$ -D-arabino-hexopyranosid-3-ulose (4NP $\alpha$ 3ketoG) and spontaneous deglycosylation products 4-nitrophenol and 1,5-anhydro-D-erythro-hex-1-en-3-ulose (2-hydroxy-3-keto-glucal) (300 MHz,  $\text{D}_2\text{O}$ ):  $\delta$  8.15 (d,  $J = 8.7$  Hz, 2H, H-b and H-d), 8.07 (d,  $J = 8.8$  Hz, 2H, H-b' and H-d'), 7.43 (s, 1H, H-1'), 7.18 (d,  $J = 8.6$  Hz, 2H, H-a and H-c), 6.86 (d,  $J = 8.6$  Hz, 2H, H-a' and H-c'), 6.09 (d,  $J = 4.3$  Hz, 1H, H-1), 4.71 (s, 1H, H-2), 4.44 (d,  $J = 9.4$  Hz, 1H, H-4), 4.16 (s, 1H, H-4'), 4.02 (s, 1H, H-5'), 3.77 (m, 1H, H-5), 3.57 (s, 1H, H-6'), 3.54 (s, 1H, H-6'), 3.33–2.78 (m, 2H, H-6 and H-6).

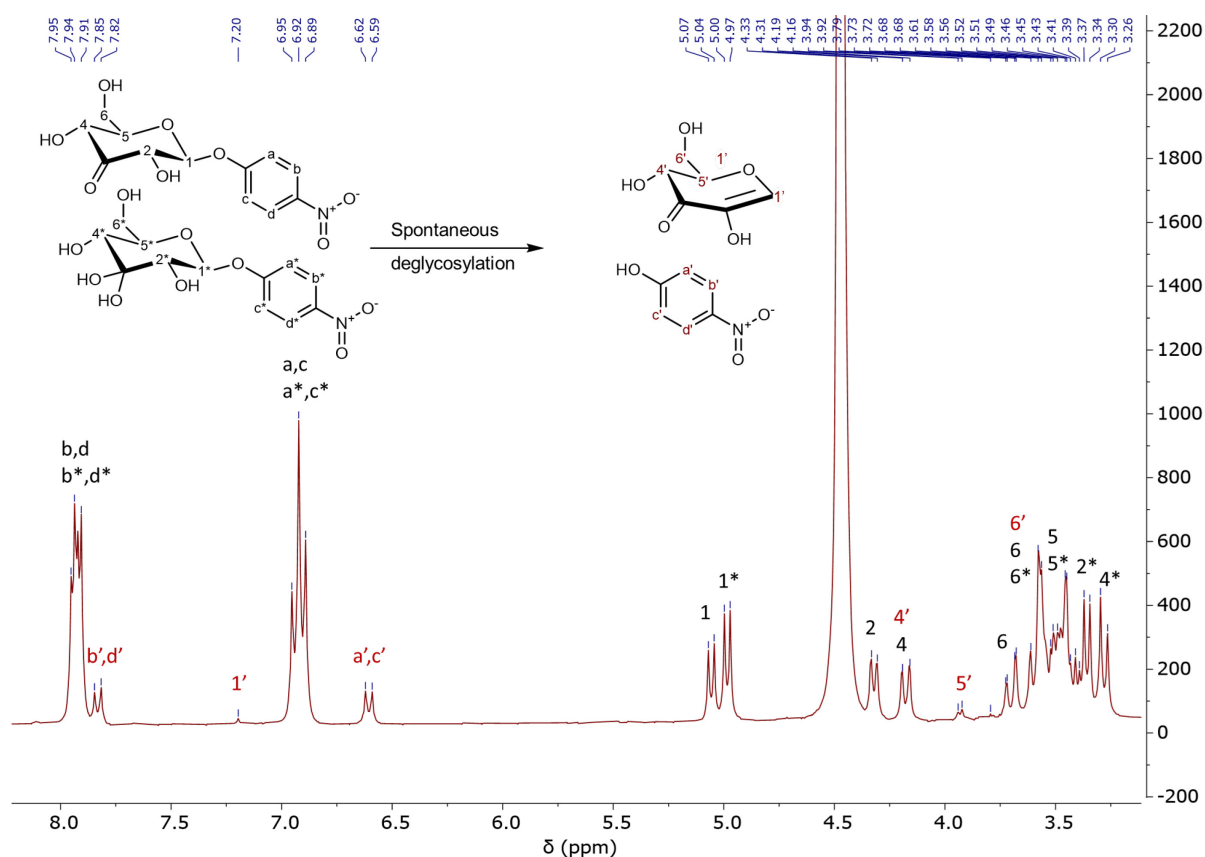

**Supplementary Figure 48.**  $^1\text{H}$  NMR spectrum of 4-nitrophenyl  $\beta$ -D-arabino-hexopyranosid-3-ulose (4NP $\beta$ 3ketoG), present partly in hydrated (gem-diol) form (60%); Spontaneous deglycosylation to products 4-nitrophenol and 2-hydroxy-3-keto-glucal (300 MHz,  $\text{D}_2\text{O}$ ):  $\delta$  7.99-7.87 (m, 4H, H-b, H-d, H-b\* and H-d\*), 7.83 (d,  $J = 9.1$  Hz, 2H, H-b' and H-d'), 7.20 (s, 1H, H-1'), 6.92 (m, 4H, H-a, H-c, H-a\* and H-c\*), 6.61 (d,  $J = 9.0$  Hz, 2H, H-a' and H-c'), 5.06 (d,  $J = 7.9$  Hz, 1H, H-1), 4.98 (d,  $J = 7.9$  Hz, 1H, H-1\*), 4.32 (d,  $J = 7.8$  Hz, 1H, H-2), 4.17 (d,  $J = 10.1$  Hz, 2H, H-4, H-4'), 3.93 (d,  $J = 5.3$  Hz, 1H, H-5'), 3.70 (dd,  $J = 12.2, 2.0$  Hz, 1H, H-6), 3.59 (m, 5H, H-6, H-6\*, H-6\*, H-6' and H-6'), 3.46 (m, 2H, H-5 and H-5\*), 3.36 (d,  $J = 7.9$  Hz, 1H, H-2\*), 3.28 (d,  $J = 9.6$  Hz, 1H, H-4\*)

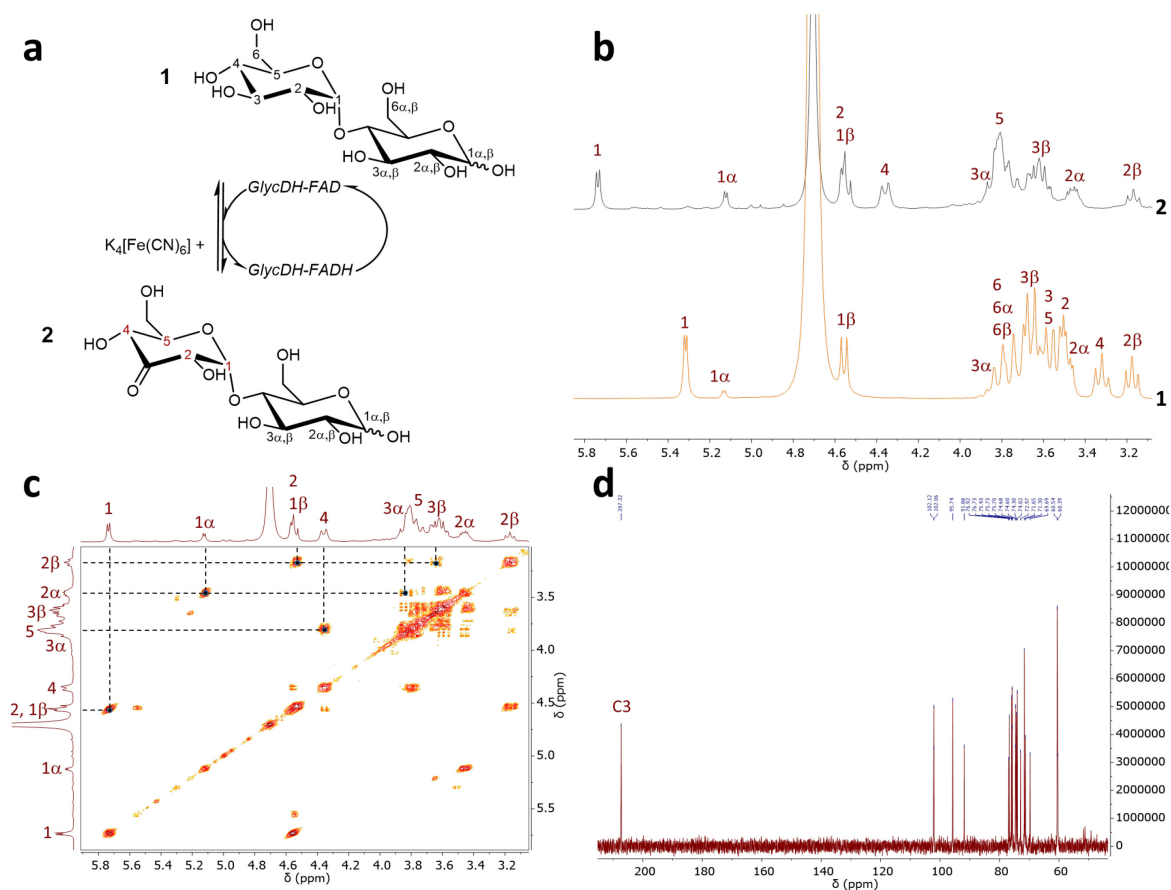

**Supplementary Figure 49.** Product identification from the GlycDH-catalyzed reaction with maltose. **a.** Reaction scheme for the conversion of maltose (**1**) into 3'-keto-maltose (**2**). **b.** Stacked substrate (**1**) and product (**2**)  $^1H$  NMR spectra showing the missing H-3 signal in **2**, indicating full conversion of maltose into 3'-keto-maltose. The signals from H-1, H-2 and H-4 are shifted downfield due to the deshielding effect from the C3 keto-moiety. **c.** COSY analysis of 3'-keto-maltose. The relevant coupling interactions are indicated with dashed lines. No cross peak is observed for H-2, proving the oxidation at C3. **d.**  $^{13}C$  NMR spectrum showing the expected chemical shift of a carbonyl carbon (~209 ppm) due to oxidation at C3. All the NMR experiments were performed in  $D_2O$  ( $^1H$  NMR, 300 MHz;  $^{13}C$  NMR, 126 MHz).



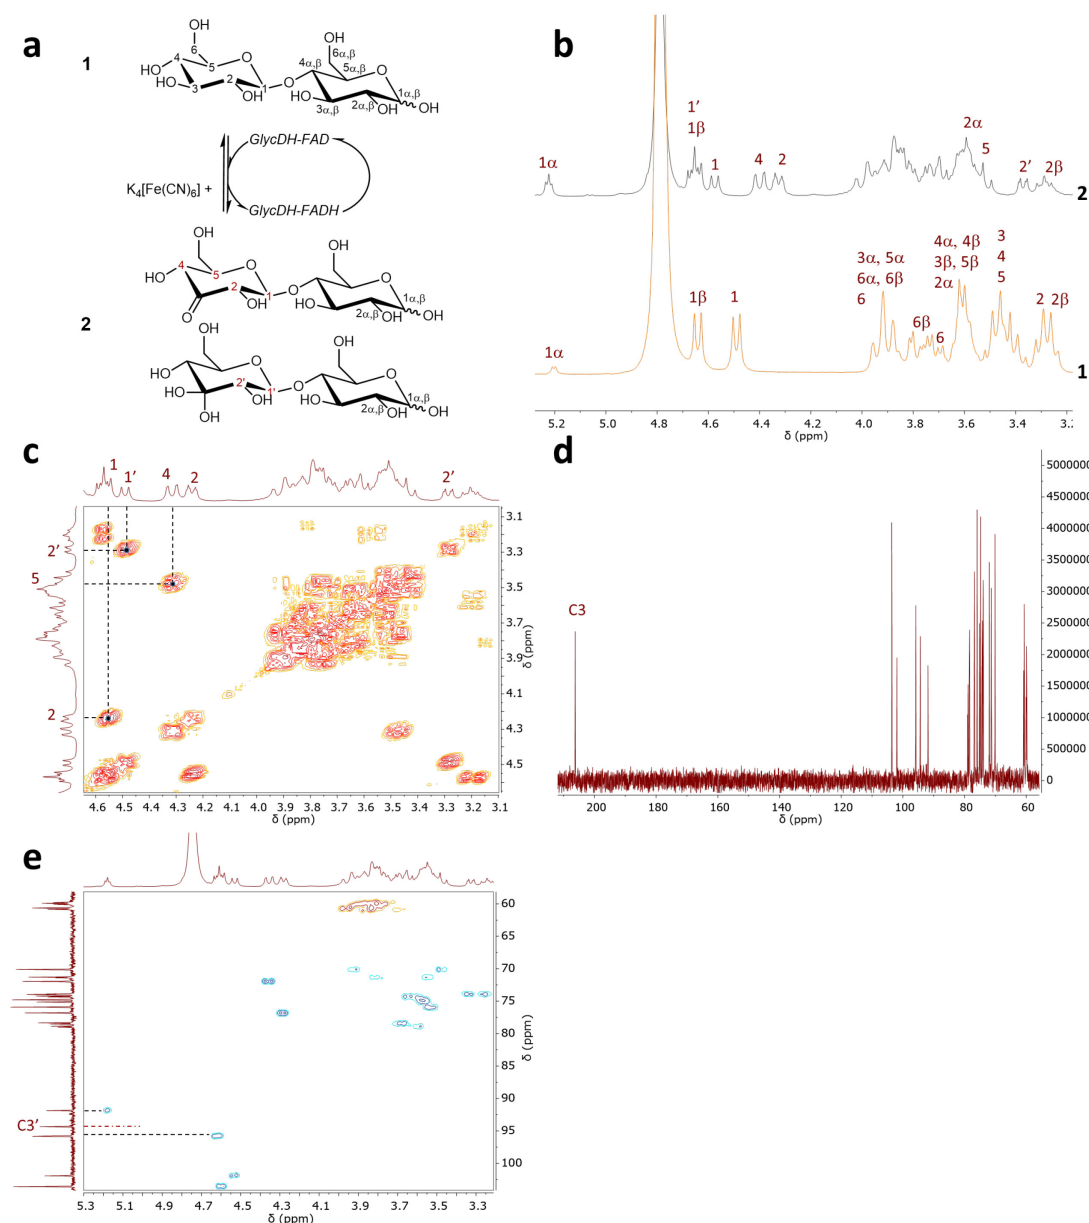

**Supplementary Figure 50.** Product identification from the GlycDH-catalyzed reaction with cellobiose. **a.** Reaction scheme for the conversion of cellobiose (**1**) into 3'-keto-cellobiose (**2**, present partly (55%) in the hydrated (gem-diol) form). **b.** Stacked substrate (**1**) and product (**2**)  $^1H$  NMR spectra presenting the absence of H-3 signal in **2**, indicating full conversion of cellobiose into 3'-keto-cellobiose. The signals from H-1, H-2 and H-4 are shifted downfield due to the deshielding effect from the C3 keto-moiety. **c.** COSY analysis of 3'-keto-cellobiose showing the relevant coupling interactions with dashed lines. No cross peak is observed for H-2, confirming the oxidation at C3. **d.**  $^{13}C$  NMR spectrum showing the expected chemical shift of a carbonyl carbon ( $\sim 208$  ppm) due to oxidation at C3. **e.** HSQC analysis of 3'-keto-cellobiose confirming the partial presence of gem-diol at C3' ( $\sim 95$  ppm, no proton-carbon bond correlation observed). The NMR experiments were performed in  $D_2O$  ( $^1H$  NMR, 300 MHz;  $^{13}C$  NMR, 126 MHz).

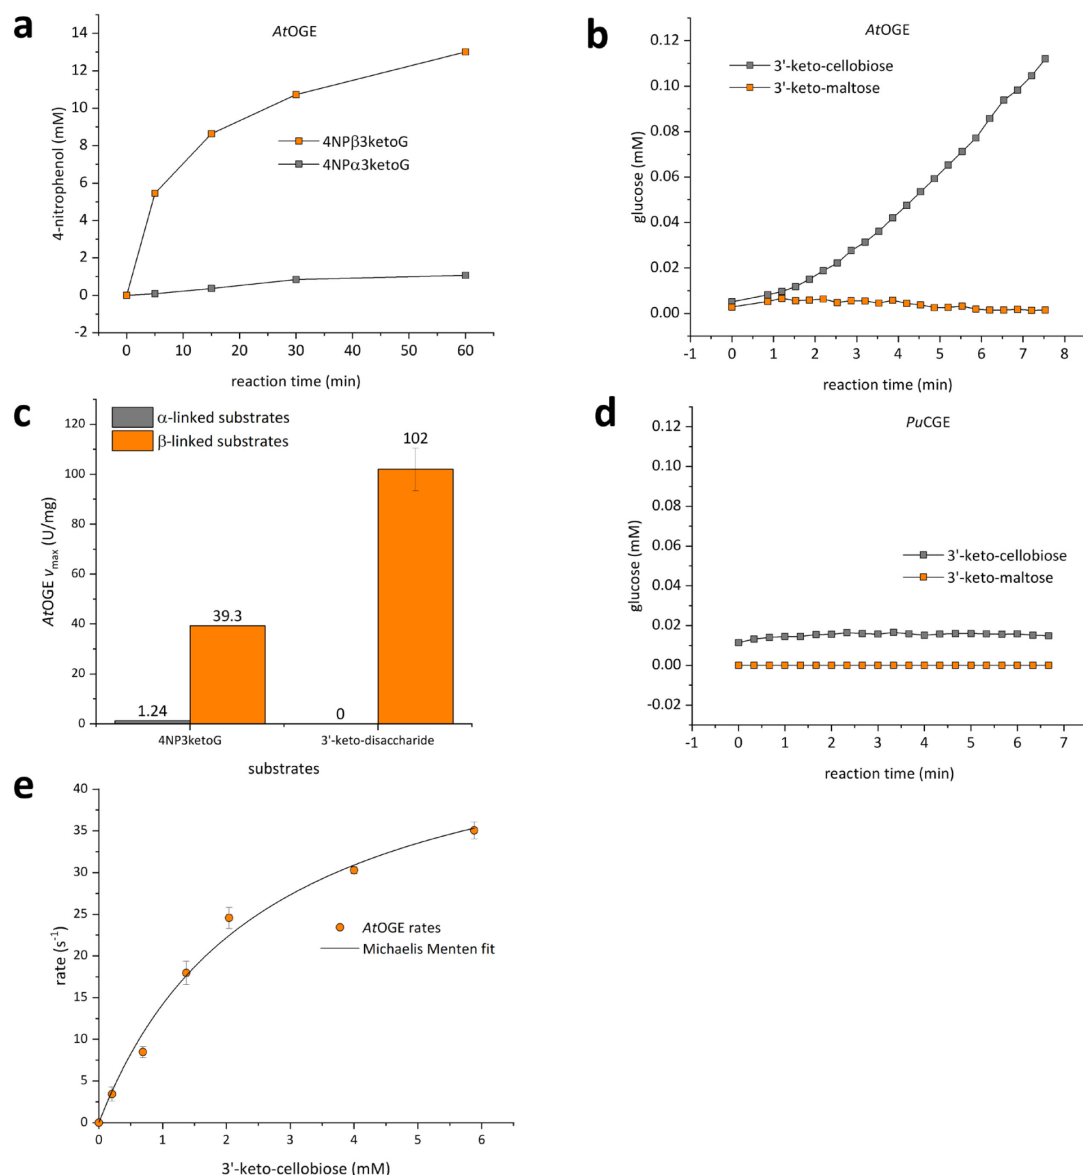

**Supplementary Figure 51.** Stereochemical preference of *AtOGE* and *PuCGE* analyzed with different  $\alpha$ - and  $\beta$ -configured substrates. **a.** Time courses of *AtOGE* catalyzed elimination of 4NP $\alpha$ 3ketoG and 4NP $\beta$ 3ketoG. **b.** Time courses of *AtOGE* or **d.** *PuCGE* catalyzed conversion of 3'-keto-maltose and 3'-keto-cellobiose. **c.** Specific activities of *AtOGE* with  $\alpha$ - and  $\beta$ -linked *O*-glycosides. **e.** Kinetic analysis of *AtOGE* ( $3.00 \times 10^{-4}$  mg/mL) and 3'-keto-cellobiose (0.2–6.0 mM). For 4NP-substrates (16 mM), initial rates were determined in potassium phosphate buffer (10 mM, pH 6.0) with 0.03 mg/mL of *AtOGE*. Reactions with keto-disaccharide substrates were performed in hexokinase assay solution (100 mM PIPES (pH 7.6), 4.7 mM ATP, 3.1 mM  $NAD^+$ , 4.9 mM  $MgCl_2$ , 1.5 U/mL hexokinase, 1.5 U/mL glucose 6-phosphate dehydrogenase) with  $3.00 \times 10^{-4}$  mg/mL *AtOGE* or 1.20 mg/mL *PuCGE*. Reactions in **b** and **d** were performed with 2.0 mM 3-keto-dissacharide. All reactions were incubated at 37 °C and 650 rpm agitation. Initial rates were fitted to the Michaelis Menten (equation 2) using

Origin software. The fit is shown as a solid line with S.D. indicated by error bars. For further experimental details and for the analytical procedures used, see the Methods section of the main manuscript. Source data are provided as a Source Data file. (n = 1 individual experiment for **a**, 2 individual experiments for **d** and **e**, and 3 individual experiments for **b**).

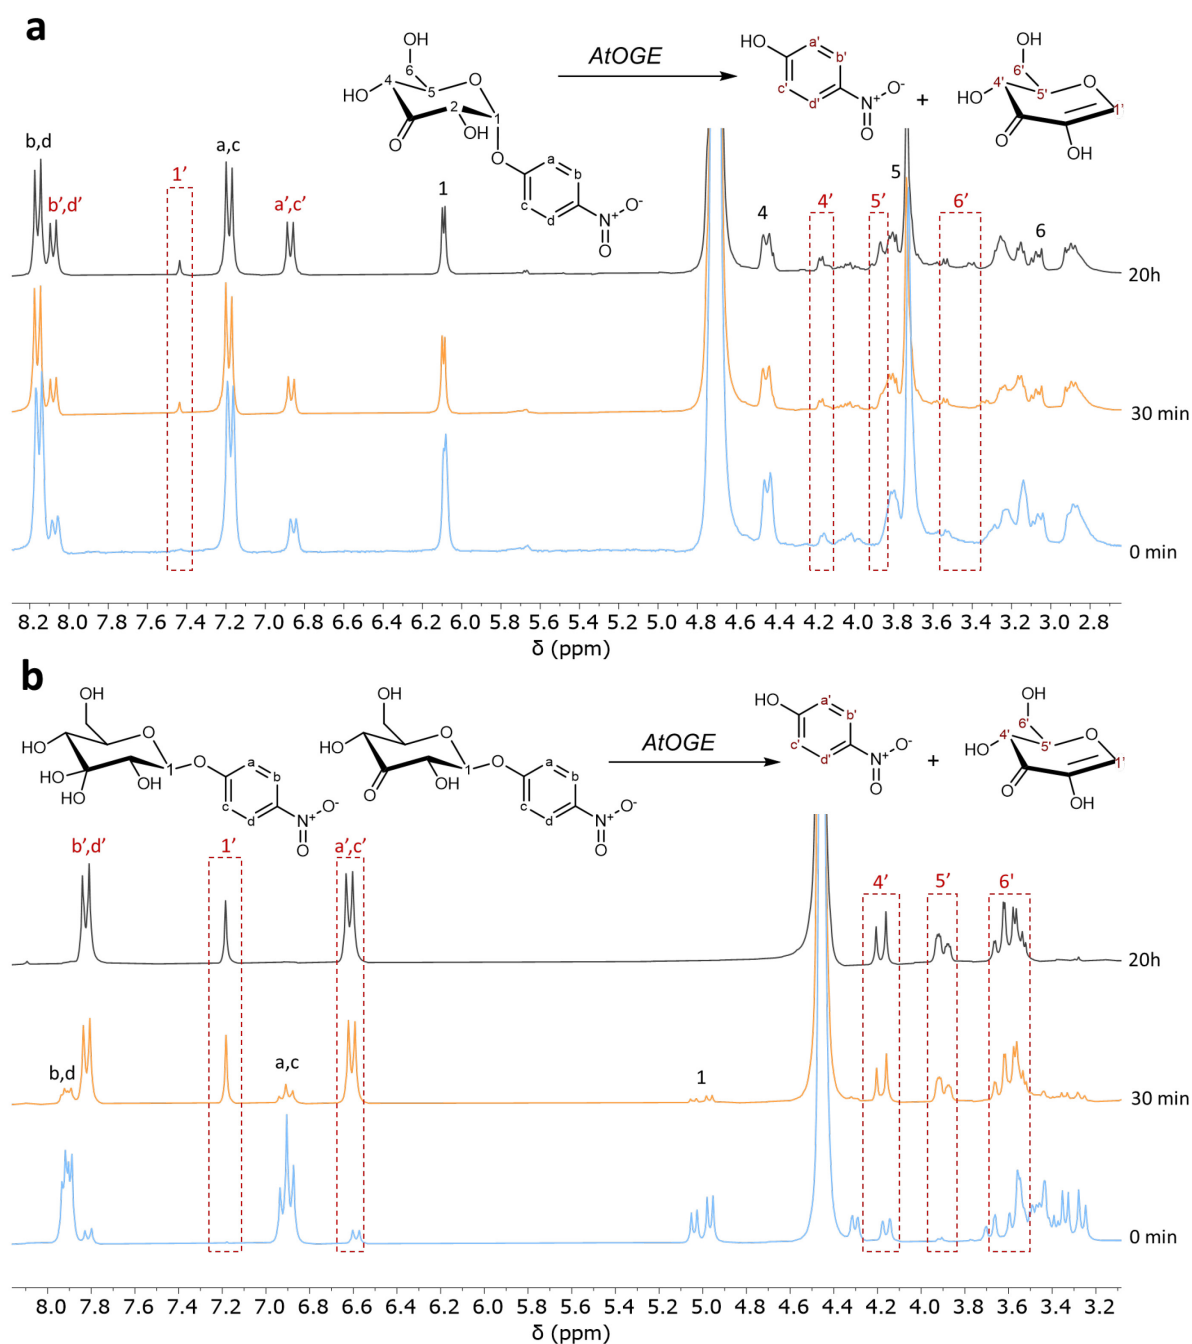

**Supplementary Figure 52.**  $^1\text{H}$  NMR spectra of *AtOGE*-catalyzed elimination of 4NPα3ketoG (**a**) and 4NPβ3ketoG (**b**). Starting substrate for **b** is a 3-keto and 3-hydrated (gem-diol) mixture. Substrate (15 mM) was dissolved in potassium phosphate buffer (10 mM, pD 6.9) and measured before, 30 min and 20 h after enzyme administration (0.04 mg/mL). Between measurements (300 MHz), the sample was incubated at 37 °C.

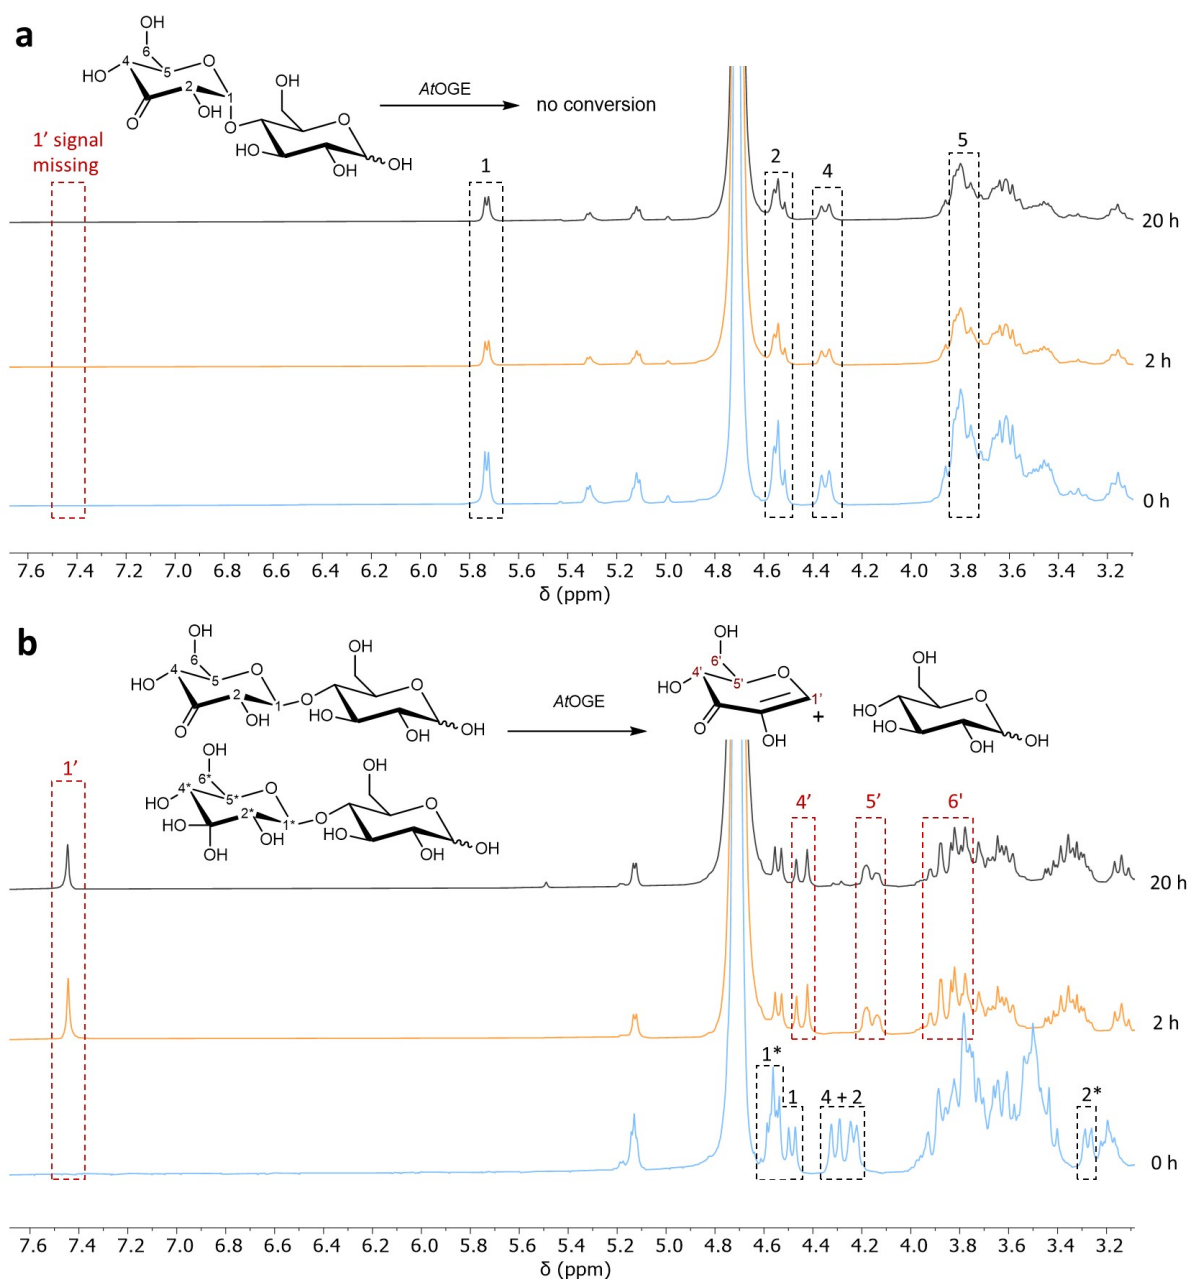

**Supplementary Figure 53.**  $^1\text{H}$  NMR spectra of *AtOGE*-catalyzed elimination of 3'-ketomaltose (**a**) and 3'-keto-cellobiose (**b**). Starting substrate for **b** is a 3-keto and 3-hydrated (gem-diol) mixture. Substrate (15 mM) was dissolved in potassium phosphate buffer (10 mM, pD 6.9) and measured before, 2 h and 20 h after *AtOGE* administration (0.16 mg/mL). Between measurements (300 MHz), the sample was incubated at 37 °C.

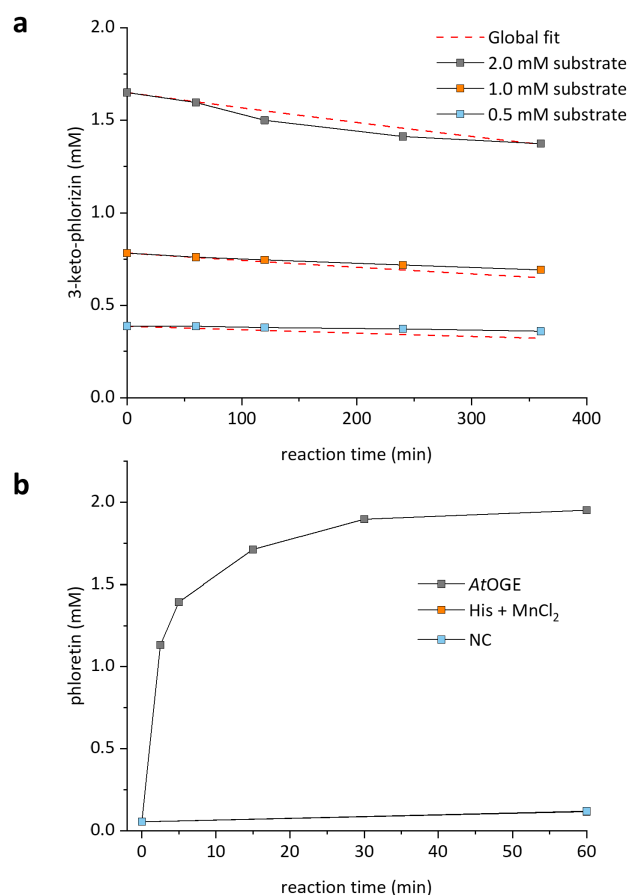

**Supplementary Figure 54.** Spontaneous deglycosylation of 3-keto-phlorizin based on phloretin release. **a.** 3-keto-phlorizin degradation at different starting concentrations with global fitting of the data with Equation 1 in main text (exponential fit) for determination of rate constant. **b.** Time course of phloretin release with the addition of free catalytic groups compared to AtOGE as positive control (PC). For all reactions ( $n = 1$  individual experiment), 3-keto-phlorizin (0.5–2.0 mM) was dissolved in HEPES buffer (50 mM; pH 6.5) to avoid precipitation of added  $\text{MnCl}_2$ , incubated at 37 °C for 4 h under agitation (650 rpm), quenched with MeCN and analyzed on HPLC. AtOGE ( $5.00 \times 10^{-3}$  mg/mL; 0.2  $\mu\text{M}$ ) was used as a positive control and 1000-fold equimolar amounts of histidine and  $\text{MnCl}_2$  (167  $\mu\text{M}$ ) were added to the spontaneous degradation experiment (**b**). No enzyme or free catalytic group was added to the negative control (NC), which overlaps with the His +  $\text{MnCl}_2$  graph. Sigma plot 10.0 was used to fit the rate constant for spontaneous elimination ( $k$ ) using the time courses shown in **a**.  $k = -8.6 \pm 1.5 \times 10^{-6} \text{ s}^{-1}$  (95% confidence interval). For further experimental details and for the analytical procedures used, see the Methods section of the main manuscript. Source data are provided as a Source Data file.

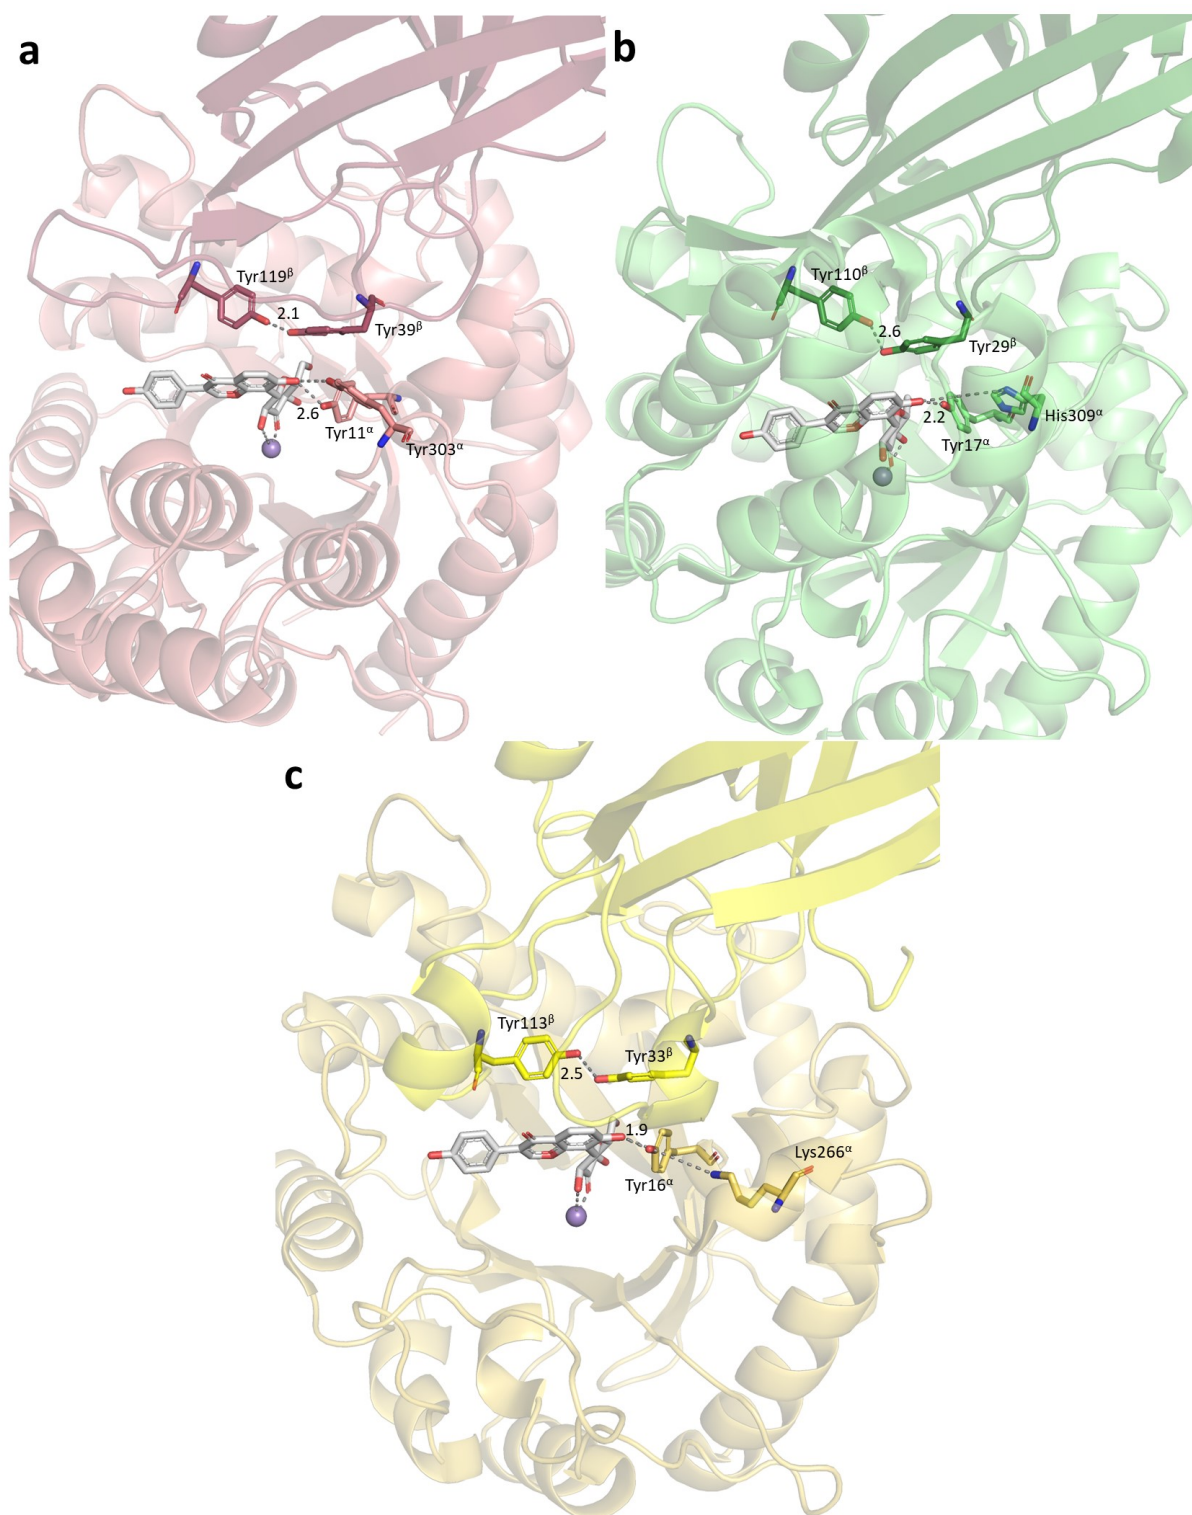

**Supplementary Figure 55.** Conserved Tyr residues among CGEs. CGEs show conserved active site/substrate coordinating Tyr residues in both subunits. CGEs from human gut bacterial strain PUE<sup>8</sup> (a), *A. globiformis*<sup>8</sup> (b) and *E. cellulosolvens*<sup>8</sup> (c) were compared. Docking from 7exz and 3-keto-puerarin was used and superimposed with AgCGE2 and EuCGE. Substrate 3-keto-puerarin in grey and Mn<sup>2+</sup> in purple.



# Subunit A

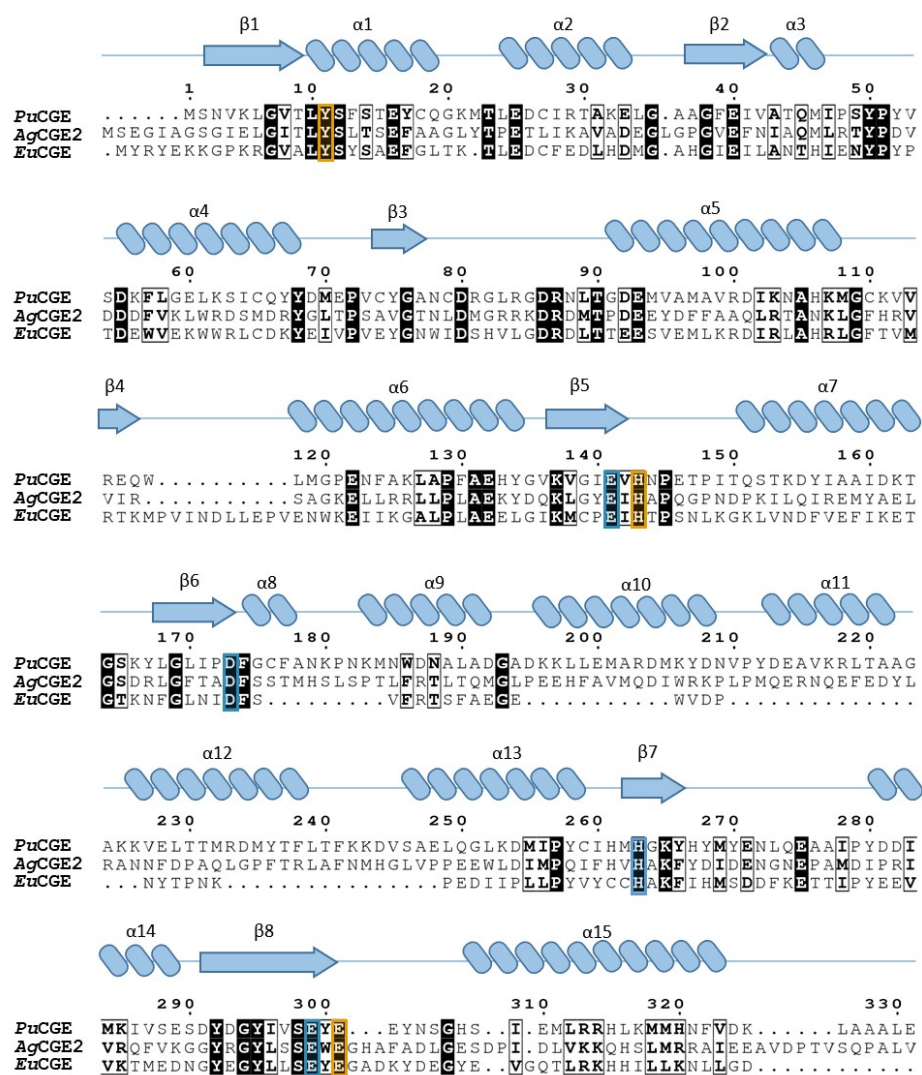

# Subunit B

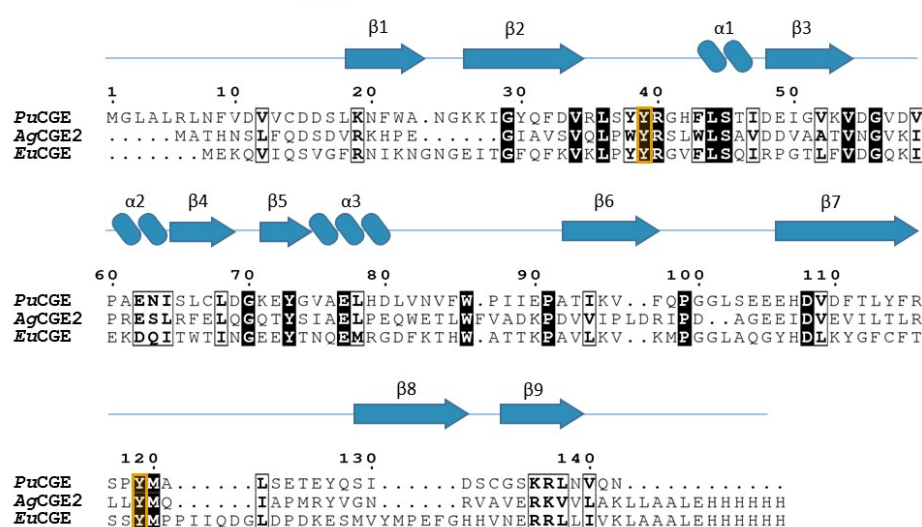

**Supplementary Figure 56.** Sequence alignment of CGEs showing conserved residues and secondary structures. Mn<sup>2+</sup> coordinating residues highlighted in blue, conserved Tyr and other catalytic residues in ochre. Sequences were aligned using the Muscle alignment and processed in the ESPrnt 3 (<https://esprnt.ibcp.fr/ESPrnt/ESPrnt/index.php>) online tool.

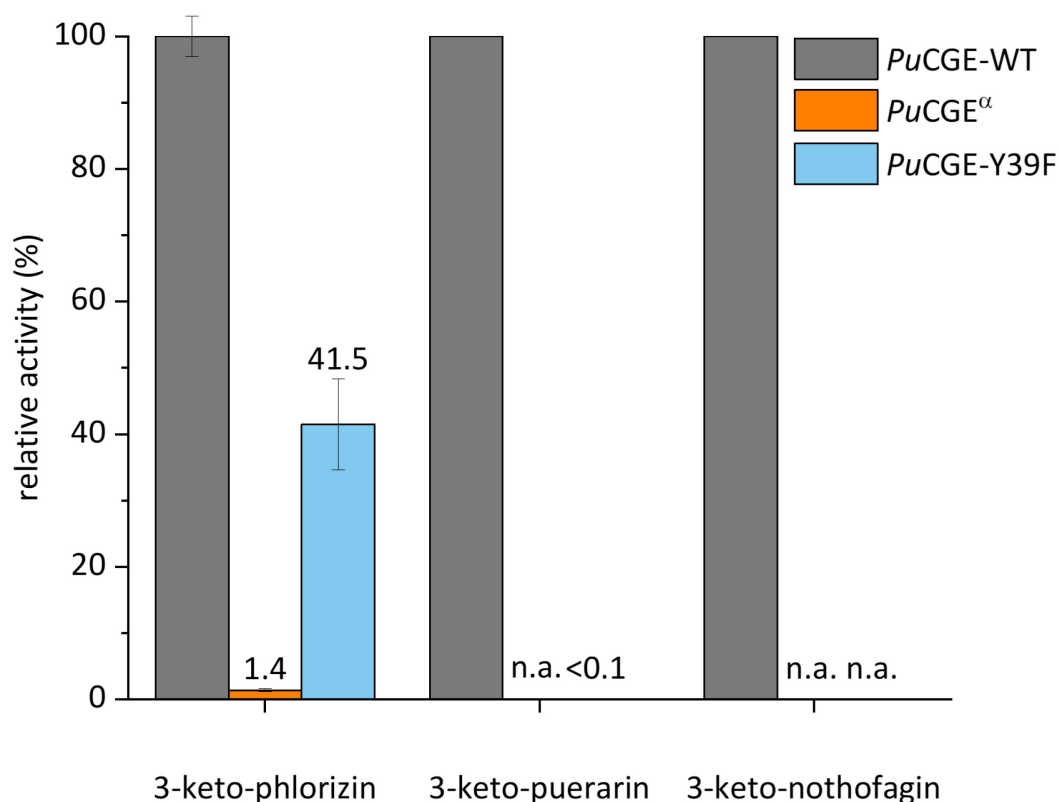

**Supplementary Figure 57.** Relative activity of *PuCGE* variants with *O*- and *C*-glycosides compared to the wild-type (WT). Relative activities were determined by dividing the specific activity of reactions by WT enzyme rates. Substrates (1.5 mM) were dissolved in potassium phosphate buffer (10 mM, pH 6.0, 5.0% (v/v) DMSO) and incubated at 37 °C under agitation (650 rpm). For 3-keto-phlorizin, 3-keto-puerarin and 3-keto-nothofagin (both,  $n = 1$  individual experiment) 0.10, 0.05 and 0.10 mg/mL *PuCGE*-WT were added, respectively. Variants *PuCGE*<sup>α</sup> and *PuCGE*-Y39F were used at a concentration of 0.50 mg/mL. Samples were quenched with MeCN and analyzed on HPLC. n.a. = no activity determined. For further experimental details and for the analytical procedures used, see the Methods section of the main manuscript. Source data are provided as a Source Data file. ( $n = 1$  individual experiment for *C*-glycoside substrates;  $n = 3$  individual experiments for *O*-glycoside substrate).



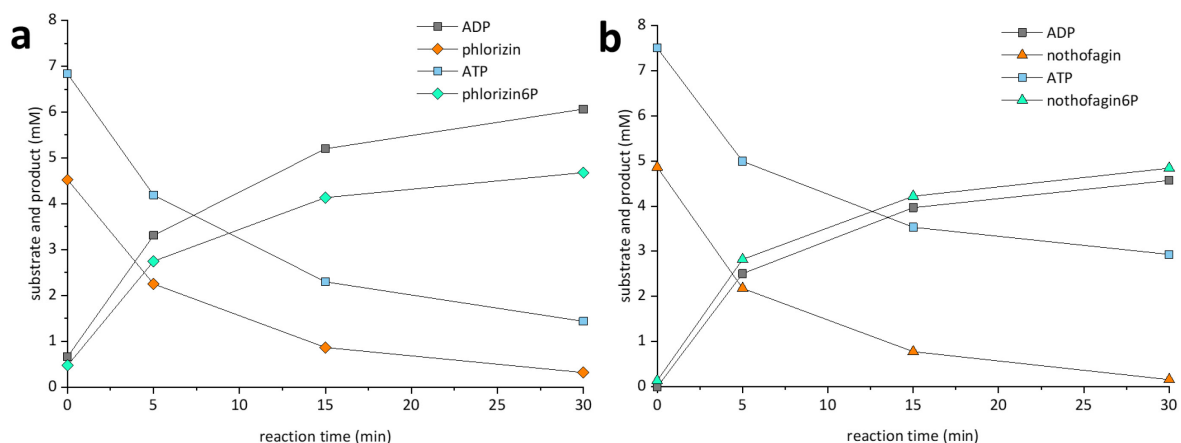

**Supplementary Figure 58.** The 6-phospho- $\beta$ -glucoside kinase from *Klebsiella pneumoniae* (BglK)<sup>11</sup> catalyzed phosphorylation of phlorizin (**a**) and nothofagin (**b**). Typically, 5.0 mM substrates, 1.0 mM MgCl<sub>2</sub> and 1.5-fold mM of ATP in respect to substrate concentration were dissolved in 10% (v/v) DMSO and 50 mM HEPES buffer pH 6.5. BglK was used at 1.00 mg/mL and reactions were incubated at 37 °C and 650 rpm agitation. Reactions (n = 1 individual experiment) were quenched in MeCN and analyzed on HPLC. Phosphorylated product is shown as substrate6P. For further experimental details and for the analytical procedures used, see the Methods section of the main manuscript. Source data are provided as a Source Data file.

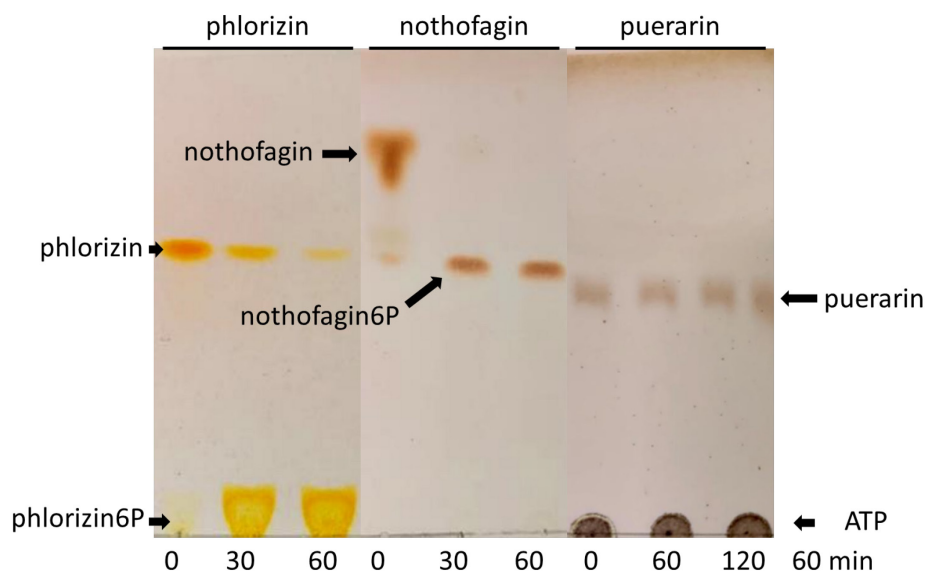

**Supplementary Figure 59.** TLC analysis of BglK-catalyzed phosphorylation of various substrates. For chromatograms of phlorizin and puerarin a mobile phase of 1:9 MeCN and dH<sub>2</sub>O was used, for nothofagin 2:1:1 of 1-butanol, acetic acid and dH<sub>2</sub>O. TLC plates detecting phlorizin were developed with *p*-anisaldehyde stain, all other TLC plates were developed using a thymol stain. Reaction parameters as described in Figure S58 were used (n = 1 individual experiment). Source data are provided as a Source Data file.

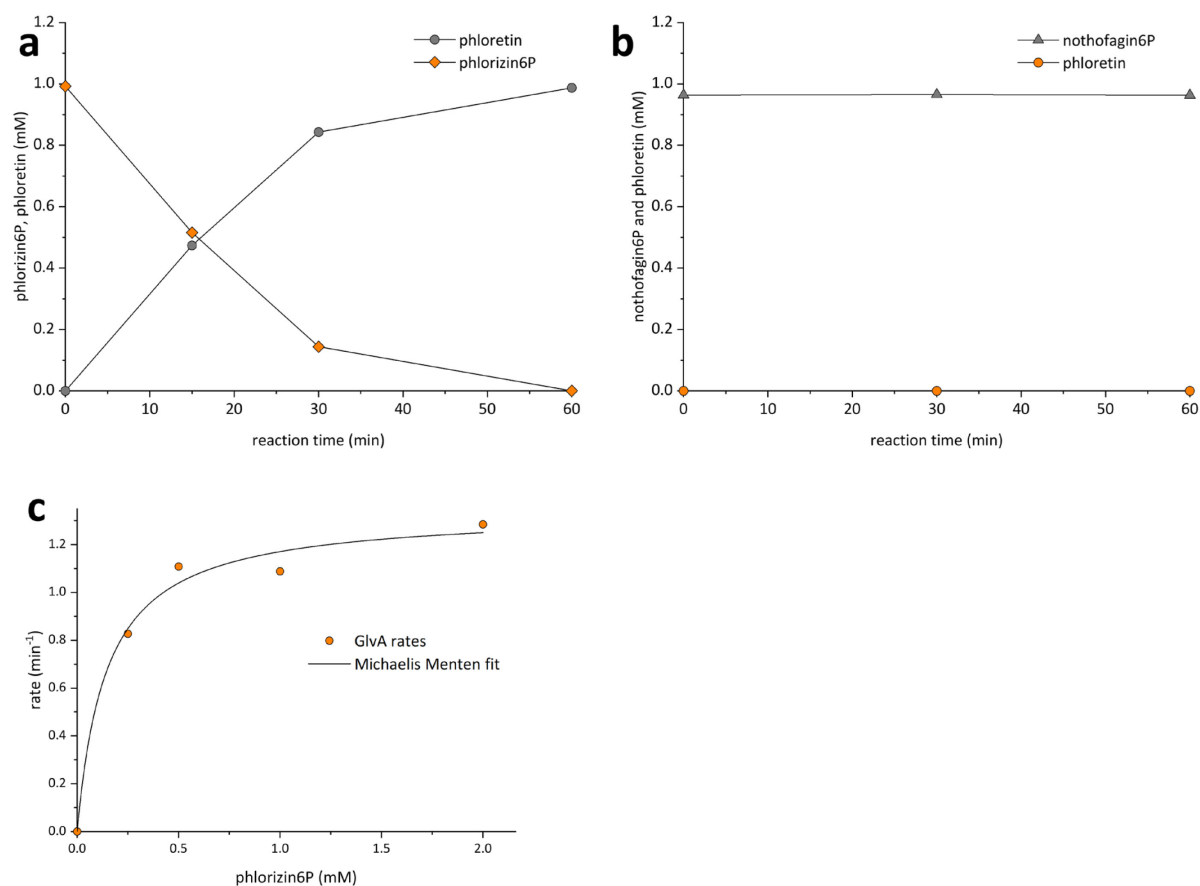

**Supplementary Figure 60.** Time courses of GlvA-catalyzed reactions and activity parameters associated with the reactions. **a.** Phlorizin-6-phosphate (phlorizin6P) **b.** Nothofagin-6-phosphate (nothofagin6P). **c.** Kinetic analysis of GlvA with phlorizin6P. A substrate range of 0.0–2.0 mM was tested. Reactions were conducted in 50 mM HEPES pH 7.5 (nothofagin6P in pH 6.5) buffer with 0.5 mM  $\text{MnSO}_4$  and 0.3 mM  $\text{NAD}^+$ . The reactions were initiated with the addition of GlvA (for **a** and **b** 2.00, for **c** 1.00 mg/mL) at 37 °C. Reactions were quenched with MeCN and analyzed on HPLC ( $n = 1$  individual experiment). Initial rates were fitted to the Michaelis Menten (equation 2) using Origin software. The fit is shown as a solid line. For further experimental details and for the analytical procedures used, see the Methods section of the main manuscript. Source data are provided as a Source Data file.

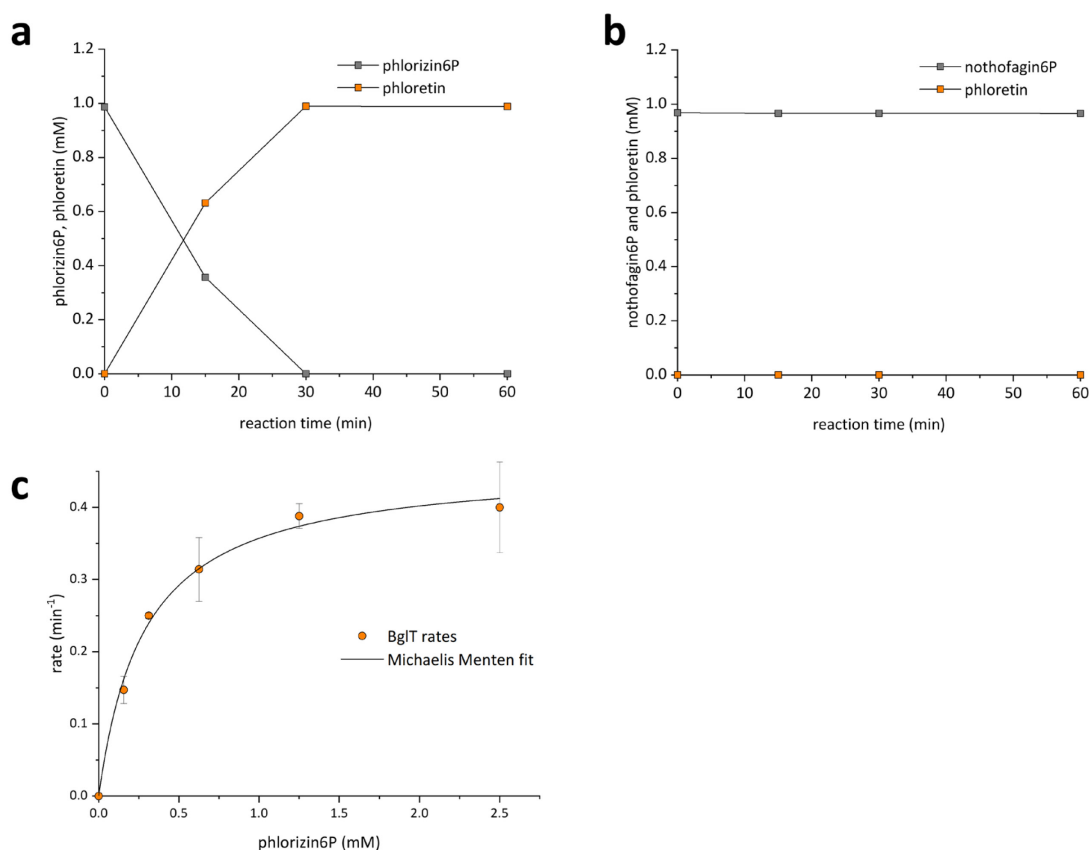

**Supplementary Figure 61.** Time courses of BglT<sup>12</sup>-catalyzed reactions and activity parameters associated with the reactions. **a.** Phlorizin-6-phosphate (phlorizin6P) **b.** Nothofagin-6-phosphate (nothofagin6P). **c.** Kinetic analysis of BglT with phlorizin6P. A substrate range of 0.1–2.5 mM was tested. Reactions were conducted in 50 mM HEPES pH 7.5 (nothofagin6P in pH 6.5) buffer with 0.5 mM MnSO<sub>4</sub> and 0.3 mM NAD<sup>+</sup>. The reactions were started with the addition of BglT (2.00 for **a** and **b**, 1.00 mg/mL for **d**) at 37 °C. Reactions were quenched with MeCN and analyzed on HPLC (n = 1 individual experiment in **a** and **b**, n = 3 individual experiments in **c**). Initial rates were fitted to the Michaelis-Menten (Equation 2, main text) using Origin software. The fit is shown as a solid line with S.D. indicated by error bars. For further experimental details and for the analytical procedures used, see the Methods section of the main manuscript. Source data are provided as a Source Data file.

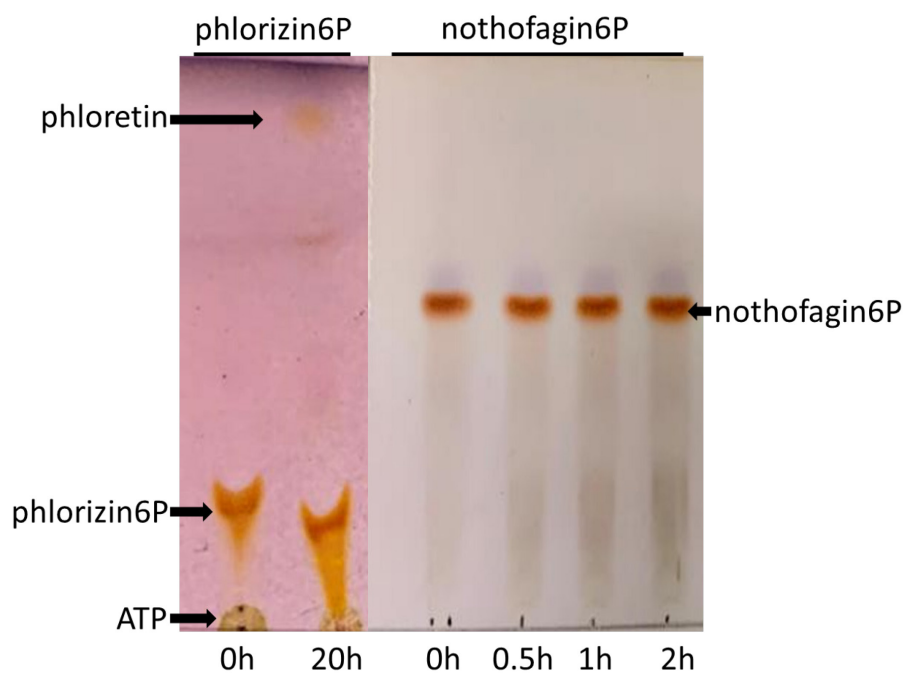

**Supplementary Figure 62.** TLC analysis of GlvA-catalyzed deglycosylation of phlorizin6P and nothofagin6P. Compounds from the phlorizin6P reaction were separated using a 9:1 mobile phase of MeCN and dH<sub>2</sub>O. A *p*-anisaldehyde based stain was used. Compounds from the nothofagin6P reaction were separated using a 2:1:1 mobile phase of 1-butanol, acetic acid and dH<sub>2</sub>O. A thymol-based stain was used. Same reaction parameters as described in Figure 60 were used (n = 1 individual experiment). Source data are provided as a Source Data file.

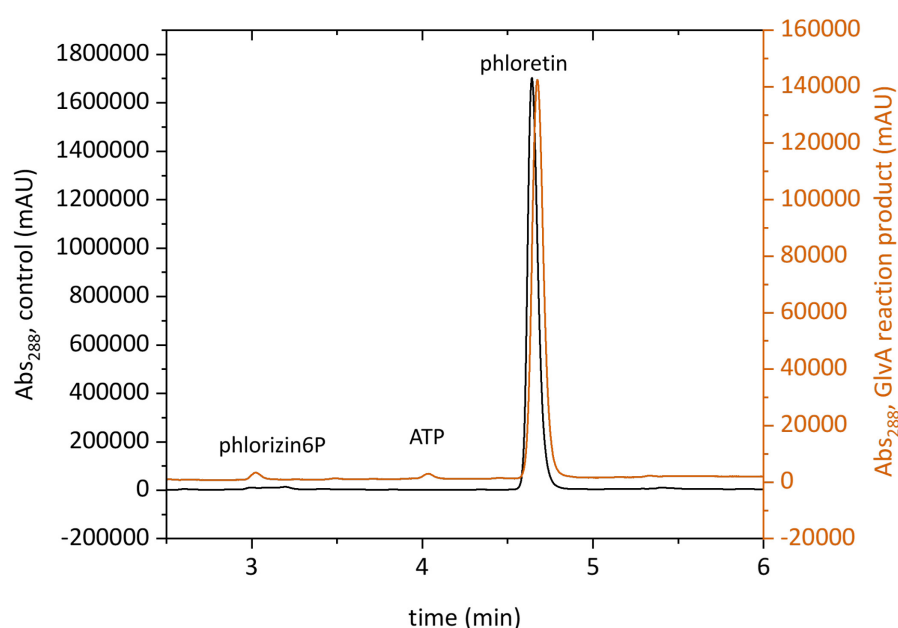

**Supplementary Figure 63.** HPLC chromatogram of GlvA-catalyzed deglycosylation of phlorizin6P, based on measurement of aglycone release ( $n = 1$  individual experiment). The GlvA reaction sample (orange) is superimposed on phloretin control sample (black). Isolated phlorizin6P was dissolved in 50 mM HEPES buffer (pH 7.5) with 0.5 mM  $\text{MnSO}_4$  and 0.3 mM  $\text{NAD}^+$ . The reaction was started using GlvA (2.00 mg/mL) at 37 °C, quenched with MeCN and analyzed on HPLC. Besides the aglycone product phloretin, small residues from the starting substrate and ATP were detected.

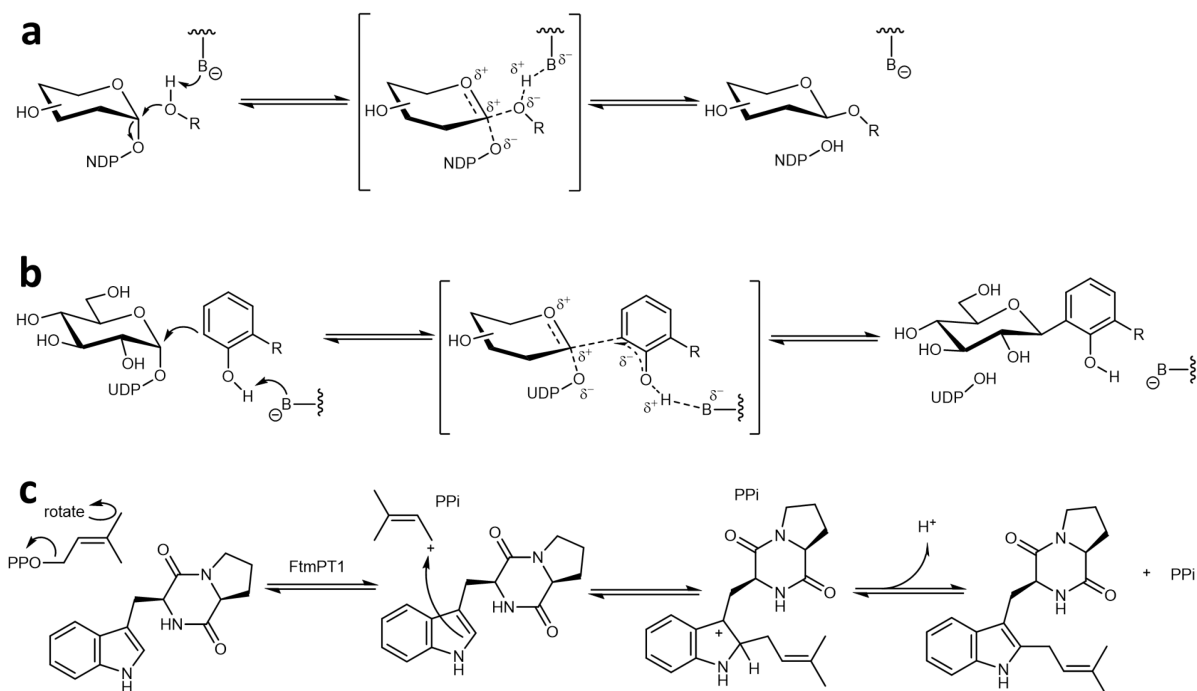

**Supplementary Figure 64.** Proposed mechanisms of glycosyltransferase and alkyltransferase reactions. **a.** General reaction of an inverting *O*-glycosyltransferase.<sup>13</sup> **b.** Proposed reaction of an aromatic *C*-glycosyltransferase.<sup>13</sup> **c.** Proposed reaction of the *C*-prenyltransferase FtmPT1<sup>14</sup> representing alkyltransferases. B = general base catalyst.

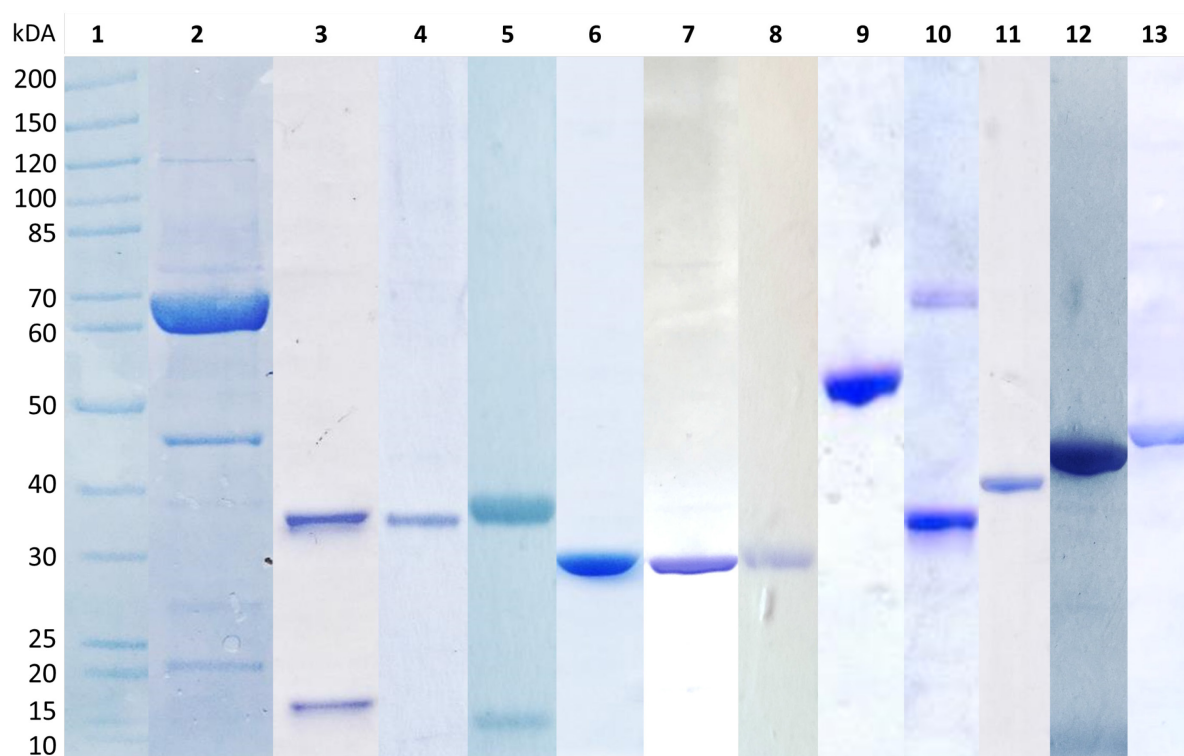

**Supplementary Figure 65.** SDS polyacrylamide gel showing the purified enzymes used in this study and their theoretical subunit molecular mass in parenthesis. **1:** protein size standard. **2:** GlycDH (66.3 kDa) and twin-arginine translocation pathway (TAT) signal protein (20.3 kDa). **3:** *PuCGE*; monomer  $\alpha$  (39.2 kDa) and  $\beta$  (18.3 kDa). **4:** *PuCGE* $^{\alpha}$  (39.2 kDa). **5:** *PuCGE*-Y39F $^{\beta}$ ; monomer  $\alpha$  (39.2 kDa) and  $\beta$  (18.3 kDa). **6:** *AtOGE* (29.9 kDa). **7:** *AtOGE*-H134A (29.9 kDa). **8:** *AtOGE*-H189A (29.9 kDa). **9:** GH4 family enzyme GlvA (52.1 kDa). **10:** BglK (34.9 kDa). **11:** *AtHYD* (41.0 kDa). **12:** Gfo Oxo from *A. tumefaciens* (43.6 kDa). **13:** GH4 family enzyme BglT (49.0 kDa). Source data are provided as a Source Data file.



## Supplementary Tables

**Supplementary Table 1.** Activity parameters of GlycDH for oxidation of different substrates (n = 1 individual experiment). Initial rates were determined at 2.0 mM substrate concentration.

<sup>1)</sup>Rates determined from the sum of oxidized 3-keto- and further isomerized 2-keto-product;

<sup>2)</sup>Apparent  $k_{cat}$  calculated from the specific activity. <sup>3)</sup>Reaction with O<sub>2</sub> instead of K<sub>3</sub>[Fe(CN)<sub>6</sub>] as electron acceptor. <sup>4)</sup>mM isomerized per minute from 3-keto- to 2-keto-glucoside.

<sup>5)</sup>Percentage of 2-keto-glucoside within converted product. For experimental details and the analytical procedures used, see the Methods section Synthesis and isolation of keto-glycosides.

| Substrate                         | Specific activity (U/mg)                             | $k_{cat}$ (s <sup>-1</sup> ) <sup>2)</sup> | Conversion (%) / h<br>[2.0 mM starting substrate] | Oxidized position |
|-----------------------------------|------------------------------------------------------|--------------------------------------------|---------------------------------------------------|-------------------|
| Phlorizin                         | 5.25<br>(0.01) <sup>3)</sup>                         | 5.80                                       | 100                                               | C3                |
| Puerarin <sup>1)</sup>            | 0.43                                                 | 0.47                                       | 73                                                | C2/C3             |
| Nothofagin (pH 5.7) <sup>1)</sup> | 1.86<br>(0.02 mM/min<br>isomerization) <sup>4)</sup> | 2.05<br>-                                  | 93<br>(11% 2-keto-form) <sup>5)</sup>             | C2/C3             |
| Nothofagin (pH 7) <sup>1)</sup>   | 3.78<br>(0.30 mM/min<br>isomerization) <sup>4)</sup> | 4.18<br>-                                  | 100<br>(85% 2-keto-form) <sup>5)</sup>            | C2/C3             |

**Supplementary Table 2.** Crystallographic data collection and refinement statistics of *At*OGE.

Statistics for the highest-resolution shell are shown in parentheses.

|                                | <b>AtOGE</b>                                   |
|--------------------------------|------------------------------------------------|
| Wavelength (Å)                 | 1.033                                          |
| Resolution range (Å)           | 46.83 - 1.995 (2.067 - 1.995)                  |
| Space group                    | P 2 <sub>1</sub> 2 <sub>1</sub> 2 <sub>1</sub> |
| Unit cell (Å, °)               | 36.58, 93.67, 123.68; 90 90 90                 |
| Total reflections              | 368496 (32392)                                 |
| Unique reflections             | 29564 (2699)                                   |
| Multiplicity                   | 12.5 (12.0)                                    |
| Completeness (%)               | 99.03 (91.99)                                  |
| Mean I/sigma(I)                | 20.30 (6.24)                                   |
| Wilson B-factor                | 28.81                                          |
| R-merge                        | 0.0794 (0.2910)                                |
| R-meas                         | 0.0829 (0.3038)                                |
| R-pim                          | 0.0234 (0.0859)                                |
| CC1/2                          | 0.999 (0.985)                                  |
| CC*                            | 1 (0.996)                                      |
| Reflections used in refinement | 29542 (2698)                                   |
| Reflections used for R-free    | 1124 (103)                                     |
| R-work                         | 0.1742 (0.2052)                                |
| R-free                         | 0.2175 (0.2745)                                |
| CC(work)                       | 0.972 (0.911)                                  |
| CC(free)                       | 0.939 (0.852)                                  |
| Number of non-hydrogen atoms   | 3644                                           |
| macromolecules                 | 3339                                           |
| ligands                        | 3                                              |
| solvent                        | 302                                            |
| Protein residues               | 439                                            |
| RMS(bonds)                     | 0.006                                          |
| RMS(angles)                    | 0.80                                           |
| Ramachandran favored (%)       | 97.90                                          |
| Ramachandran allowed (%)       | 2.10                                           |
| Ramachandran outliers (%)      | 0.00                                           |
| Rotamer outliers (%)           | 0.00                                           |
| Clashscore                     | 3.14                                           |
| Average B-factor               | 34.22                                          |
| macromolecules                 | 34.05                                          |
| ligands                        | 39.08                                          |
| solvent                        | 36.05                                          |

**Supplementary Table 3.** RMSD values of *At*OGE monomer  $\beta$  superimposed with monomer  $\alpha$  and CGEs and sequence alignment with CGEs. <sup>1</sup>)Root mean square deviation of atomic positions. <sup>2</sup>)Superposition of *At*OGE monomer  $\beta$  and *Pu*CGE subunit  $\alpha$  TIM-barrel central fold. Calculated in PyMOL; sequence similarity/identity was calculated with EMBOSS Needle online tool ([https://www.ebi.ac.uk/Tools/psa/emboss\\_needle/](https://www.ebi.ac.uk/Tools/psa/emboss_needle/))

| Superimposed enzyme                | Entry ID                                       | RMSD <sup>1</sup> -value | Sequence similarity | Sequence identity |
|------------------------------------|------------------------------------------------|--------------------------|---------------------|-------------------|
| <i>At</i> OGE (subunit $\alpha$ )  | 8BVK                                           | 0.221                    | -                   | -                 |
| <i>Pu</i> CGE (subunit $\alpha$ )  | 7exz                                           | 2.775                    | 27.1                | 15.5              |
|                                    | <i>with TIM-barrel fold: 1.404<sup>2</sup></i> |                          |                     |                   |
| <i>Ag</i> CGE2 (subunit $\alpha$ ) | 7dnn                                           | 2.585                    | 22.2                | 13.4              |
| <i>Eu</i> CGE (subunit $\alpha$ )  | 7exb                                           | 2.853                    | 5.70                | 3.90              |

**Supplementary Table 4.** Activity parameters of deglycosylating enzyme systems compared. Standard deviation n = 3, otherwise n = 1; n.a. = no activity; -= not determined; Specific activity was determined at substrate saturation. <sup>1</sup>)Conversion after 24 h of incubation with 2.0 mM starting substrate, unless stated otherwise. <sup>2</sup>)*Pu*CGE was pre-incubated with 1.0 and *At*OGE with 10 mM EDTA, both for 120 min at 4.0 °C. <sup>3</sup>)Apparent  $k_{\text{cat}}$  was calculated from specific activity and enzyme concentration. <sup>4</sup>)Phlorizin6P was used as substrate. <sup>5</sup>)Parameter was obtained from a one-pot reaction, as described in **Figure S37d**. <sup>6</sup>)Initial rates determined at 2.0 mM (3-keto-nothofagin) and 16 mM substrate (*p*NP $\alpha$ 3ketoG and *p*NP $\beta$ 3ketoG). For experimental details and the analytical procedures used, see the respective Methods sections.

| Substrate                                                                                                          | Enzyme                          | Specific activity (U/mg) | Conversion (%) <sup>1)</sup> | $k_{\text{cat}}$ (s <sup>-1</sup> ) | $K_{\text{M}}$ (mM) |
|--------------------------------------------------------------------------------------------------------------------|---------------------------------|--------------------------|------------------------------|-------------------------------------|---------------------|
| 3-keto-phlorizin<br>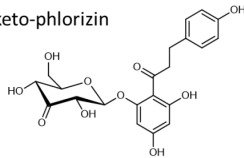              | <b><i>Pu</i>CGE</b>             | 1.25 ± 0.05              | >90                          | 1.20 ± 0.05                         | 0.6 ± 0.1           |
|                                                                                                                    | w/ EDTA <sup>2)</sup>           | 0.01                     | 3.0                          | 0.01 <sup>3)</sup>                  |                     |
|                                                                                                                    | <b><i>At</i>OGE</b>             | 235 ± 5.02               | 100                          | 117 ± 2.50                          | 0.1 ± <0.1          |
|                                                                                                                    | w/ EDTA <sup>2)</sup>           | 3.14                     | 10                           | 1.57 <sup>3)</sup>                  |                     |
|                                                                                                                    | <b><i>GlvA</i><sup>4)</sup></b> | 0.03 ± <0.01             | >90                          | 0.02 ± <0.01                        | 0.1 ± <0.1          |
|                                                                                                                    | <b><i>BglT</i><sup>4)</sup></b> | 0.01 ± <0.01             | >90                          | 0.01 ± <0.01                        | 0.3 ± <0.1          |
| 3-keto-puerarin<br>             | <b><i>Pu</i>CGE</b>             | 18.6 ± 0.41              | >90 <sup>5)</sup>            | 17.9 ± 0.39                         | 0.8 ± <0.1          |
|                                                                                                                    | w/ EDTA <sup>2)</sup>           | n.a.                     | n.a.                         | -                                   | -                   |
|                                                                                                                    | <b><i>At</i>OGE</b>             | n.a.                     | n.a.                         | -                                   | -                   |
| 3-keto-nothofagin<br>           | <b><i>Pu</i>CGE</b>             | 0.64 <sup>6)</sup>       | 27                           | 0.61 <sup>3)</sup>                  | -                   |
|                                                                                                                    | w/ EDTA <sup>2)</sup>           | n.a.                     | n.a.                         | -                                   | -                   |
|                                                                                                                    | <b><i>At</i>OGE</b>             | n.a.                     | n.a.                         | -                                   | -                   |
| <i>p</i> NP $\alpha$ 3ketoG<br> | <b><i>At</i>OGE</b>             | 1.24 <sup>6)</sup>       | 8.0 (16 mM)                  | 0.62 <sup>3)</sup>                  | -                   |
|                                                                                                                    |                                 |                          |                              |                                     |                     |
| <i>p</i> NP $\beta$ 3ketoG<br>  | <b><i>At</i>OGE</b>             | 39.3 <sup>6)</sup>       | 86 (16 mM)                   | 19.6 <sup>3)</sup>                  | -                   |
|                                                                                                                    |                                 |                          |                              |                                     |                     |
| 3-ketomaltose<br>               | <b><i>At</i>OGE</b>             | n.a.                     | n.a.                         | -                                   | -                   |
|                                                                                                                    | <b><i>Pu</i>CGE</b>             | n.a.                     | n.a.                         | -                                   | -                   |
| 3-ketocellobiose<br>            | <b><i>At</i>OGE</b>             | 102 ± 8.26               | 100                          | 50.8 ± 4.14                         | 2.6 ± 0.1           |
|                                                                                                                    | <b><i>Pu</i>CGE</b>             | n.a.                     | n.a.                         | -                                   | -                   |

**Supplementary Table 5.** Activity of *Pu*CGE variants with *O*- and *C*-glycosides compared to the wild-type form. Initial rates determined at 1.5 mM substrate concentration. Values with standard deviation n=3, otherwise n=1. Parameters were calculated from reactions described in Figure S57. For experimental details and the analytical procedures used, see the respective Methods sections.

| Substrate  | Enzyme                     | <i>U/mg</i>  | Activity relative to DgpBC (%) <sup>1)</sup> |
|------------|----------------------------|--------------|----------------------------------------------|
| Phlorizin  | <i>Pu</i> CGE-WT           | 0.91 ± 0.03  | 100                                          |
|            | <i>Pu</i> CGE <sup>α</sup> | 0.01 ± <0.01 | 1.4                                          |
|            | <i>Pu</i> CGE-Y39F         | 0.38 ± 0.06  | 42                                           |
| Puerarin   | <i>Pu</i> CGE-WT           | 18.6         | 100                                          |
|            | <i>Pu</i> CGE <sup>α</sup> | n.a.         | n.a.                                         |
|            | <i>Pu</i> CGE-Y39F         | <0.01        | <0.1                                         |
| Nothofagin | <i>Pu</i> CGE-WT           | 0.49         | 100                                          |
|            | <i>Pu</i> CGE <sup>α</sup> | n.a.         | n.a.                                         |
|            | <i>Pu</i> CGE-Y39F         | n.a.         | n.a.                                         |

**Supplementary Table 6. Sequences of enzymes.**

| <b>GlycDH (with Strep-tag and TEV restriction site)</b> |                                                                                                                                                                                                                                                                                                                                                                                                                                                                                                                                                                                                                                                                                                                                                                                                                                                                                                                                                                                                                                                                                                                                                                                                                                                                                                                                                                                                                                                                                                                                                                                                                                                                                                                                                                                                                                                                                                                                                                                                                                                                                                                                                                                                                                |
|---------------------------------------------------------|--------------------------------------------------------------------------------------------------------------------------------------------------------------------------------------------------------------------------------------------------------------------------------------------------------------------------------------------------------------------------------------------------------------------------------------------------------------------------------------------------------------------------------------------------------------------------------------------------------------------------------------------------------------------------------------------------------------------------------------------------------------------------------------------------------------------------------------------------------------------------------------------------------------------------------------------------------------------------------------------------------------------------------------------------------------------------------------------------------------------------------------------------------------------------------------------------------------------------------------------------------------------------------------------------------------------------------------------------------------------------------------------------------------------------------------------------------------------------------------------------------------------------------------------------------------------------------------------------------------------------------------------------------------------------------------------------------------------------------------------------------------------------------------------------------------------------------------------------------------------------------------------------------------------------------------------------------------------------------------------------------------------------------------------------------------------------------------------------------------------------------------------------------------------------------------------------------------------------------|
| <b>Nucleotide sequence</b>                              | 1 ATGGTACATA TGTGGAGCCA TCCGCAGTTC GAGAAAGGAAA ACCTGTATTT TCAGGGCAGC<br>61 GCCGGCGCGG ATCCGATGGC GAACAAATCAT TACGATGCGA TTGTGGTTGG TAGCGGTATT<br>121 AGCGGTGGTT GGGCGGCGAA AGAACTGACC CAGAAGGGCC TGAAAGTGCT GCTGCTGGAA<br>181 CGTGGTCGTA ACATCGAGCA CATTACCGAT TACCAGAACG CGGACAAGGA AGCGTGGGAT<br>241 TATCCGCACC GTAACCGTGC GACCCAAGAG ATGAAAGCGA AGTACCCGGT TCTGAGCCGT<br>301 GACTATCTGC TGGAGGAAGC GACCCTGGGC ATGTGGGCGG ATGAGCAGGA AACCCCGTAC<br>361 GTGGAGGAAA AACGTTTCGA CTGGTTTCGT GGTATCATG TTGGTGGCCG TAGCCTGCTG<br>421 TGGGGCCGTC AGACCTACCG TTGGAGCCAA ACCGACTTTC AGGCGAACGC GAAAGAAGGT<br>481 ATCGCGGTGG ATTGGCCGAT TCGTTATCAA GACGTGGCGC CGTGGTACGA TTATGTTGAA<br>541 CGTTTCGCGG GTATCAGCGG CAGCAAGGAA GGTCGTGACA TTCTGCCGA TGGCGAGTTT<br>601 CTGCCGCCGA TCCCGTGAA CTGCGTGGAG GAAGACGTTG CGCGTCGTCT GAAAGATCGT<br>661 TTAAGGGTA CCCGTCACCT GATCAACAGC CGTTGCGCGA ACATTACCTA GGAGTCCG<br>721 GACCAAGATC GTACCCGTTG CCAGTTTCGT AACAAATGCC GTCTGGGTTG CCCGTTCCGT<br>781 GGCTACTTTA GCACCAAAG CAGCACCTG CCGGCGGCGG TGGCGACCG CAACCTGACC<br>841 CTGCGTCCGT TCAGCATCGT TAAGGAAATC CTGTACGACA AGGATAAGAA AAAGGCGCGT<br>901 GGTGTTGAGA TCATTGACGC GGAACCAAC ATGACCTACG AGTATACCGG GGATATCATT<br>961 TTTCTGAACG CGAGCACCTT GAACAGCACC TGGGTGCTGA TGAACAGCGC GACCGATGTT<br>1021 TGGGAAGGTG GCCTGGGTAG CAGCAGCGGC GAGCTGGGTC ACAACGTGAT GGATCACCAC<br>1081 TTCCGTATGG GTGCGACCGG CGAGGTTGAA GGCTTTGACG AATTCTACTT TAAGGGTCGT<br>1141 CGTCCGGCGG GCTTCTATAT CCCGCGTTTT CGTAACATTG GTGACGAGAA ACGTAAATAC<br>1201 CTGCGTGGTT TCGGTTATCA AGGCAGCGCG AGCCGTAGCC GTTGGGAGCG TGAATCGCG<br>1261 GAAATGAACA TTGGTGCGGA CTACAAAGAT GCGCTGACCG AGCCGGGTGG CTGGACCATC<br>1321 GGTATGACCG CGTTTGCGGA AATGCTGCCG TATCACGAGA ACCGTGTGAA ACTGGACCAG<br>1381 AACAAAAAGG ATAAGTGGGG CCTGCCGGTG CTGAGCATGA ACGTTGAGCT GAAGCAAAAC<br>1441 GAACGTGACA TGCCTGAGGA TATGGTGAAC GACGCGGTTG AGATGTTGCA AGCGTGGGT<br>1501 ATCAAAAACG TGAAACCGAC CCGTGGCAGC TACGCGCCGG GTATGGGCAT TCACGAAATG<br>1561 GGTACCGCGC GTATGGGCCG TGACCCGAAG AGCAGCGTGC TGACCGGTAA CAACCAAGTT<br>1621 TGGGACGCGC CGAACGTGTT TGTTACCGAT GGTGCGTGCA TGACCAGCGC GGCCTGCGTT<br>1681 AACCCGAGCC TGACCTACAT GCGCTGACC GCGCGTGCGG CGGACTTTCG GGTAGCGAA<br>1741 CTGAAGAAGG GTAATCTGTA A |
| <b>Protein Sequence</b>                                 | 1 MVHMSHPQF EKENLYFQGS AGADPMANNH YDAIVVSGI SGGWAAKELT QKGLKVLLLE<br>61 RGRNIEHITD YQNADKEAWD YPHRNRAQTE MKAKYPVLSR DYLLLEATLG MWADEQETPY<br>121 VEEKRFDWFR GYHVGGRSL L WGRQTYRWSQ TDFEANAKEG IAVDWPIRYQ DVAPWYDYVE<br>181 RFAGISGSKE GLDILPDGEF LPIPLNCVE EDVARRLKDR FKGRHLINS RCANITQELP<br>241 DQDRTRCQFR NKCRLGCPFG GYFSTQSSTL PAAVATGNLT LRPFSIVKEI LYDKDKKKAR<br>301 GVEIIDAEIN MTYEYADII FLNASTLNST WVLMSATDV WEGGLGSSSG ELGHNVMDDH<br>361 FRMGATGEVE GFDEFYFKGR RPAGFYIPRF RNIGDEKRY LRGFGYQGS SRSRWEREIA<br>421 EMNIGADYKD ALTEPGGWTI GMTAFGEMLP YHENRVKLDQ NKKDKWGLPV LSMNVELKQN<br>481 ELDMREDMVN DAVEMFEAVG IKNVKPTRGS YAPGMGIHEM GTARMGRDPK SSVLNGNNQV<br>541 WDAPNVFVTD GACMTSAACV NPSLT YMALT ARAADFVSE LKKGNL                                                                                                                                                                                                                                                                                                                                                                                                                                                                                                                                                                                                                                                                                                                                                                                                                                                                                                                                                                                                                                                                                                                                                                                                                                                                                                                                                                                                                                                                                                  |
| <b>BglK (with Strep-tag and TEV restriction site)</b>   |                                                                                                                                                                                                                                                                                                                                                                                                                                                                                                                                                                                                                                                                                                                                                                                                                                                                                                                                                                                                                                                                                                                                                                                                                                                                                                                                                                                                                                                                                                                                                                                                                                                                                                                                                                                                                                                                                                                                                                                                                                                                                                                                                                                                                                |
| <b>Nucleotide sequence</b>                              | 1 ATGTGGAGCC ACCCCAGTT CGAGAAGGCC GCGCCGAGA ACCTGTACTT CCAGGGCATG<br>61 AAAATTGCGG CGTTTGATAT TGGCGGCACC GCGCTGAAAA TGGGCGTGAT GGCGCGCGAT<br>121 GGCCGCTGC TGGAAACCGC GCGCCAGAGC ATTAACGATA GCGATGGCGA TCGCATTCTG<br>181 CAGGCGATGC TGAGCTGGCT GGCGGCGCAT CCGAGCTGCG AAGGCATTGC GATTAGCGCG<br>241 CCGGGCTATA TTGATCCGCA TAGCGGCTTG ATTACCATGG GCGGCGCAT TCGCCGCTTT<br>301 GATAACTTTG CGATGAAAAG CTGGCTGGAA ACCCGCACCG GCCTGCCGGT GAGCGTGGAA<br>361 AACGATGCGA ACTGCGTGCT GCTGGCGGAA CGCTGGCAGG GCAAAGCGGC GGAAATGGCG<br>421 AACTTTCTGG TGCTGACCAT TGGCACCGGC ATTGGCGGCG CGATTTTTTG CCAGCATCAG<br>481 CTGATTAACG GCGCGCGCTT TCGCGCGGGC GAATTTGGCT ATATGCTGAC CGATCGCCCG<br>541 GGCGGCGCG ATCCGCGCCG CTATAGCATG AACGAAAAC GCACCTGCG CGTGCTGCGC<br>601 CATCGCTATG CGCAGCATAT TGGCGCGCCG CTGGATAGCG TGACCGGCGA ACTGATTTTT<br>661 GATCGCTATG ATGCGGGCGA TCCGGTGTGC CAGCGCCTGG TGGCGGAATT TTTTAACGGC<br>721 CTGGGCCATG GCCTGTATAA CCTGGTGCAT ATTTTGTATC CGCAGACCAT TTTTATTGGC<br>781 GGCGGCGTGG TGGAAACGCC GGGCTTTCTG ACCCTGCTGC GCCAGCATCT GCGTGTTT<br>841 GGCATTGCGG ATTATCTGGA TACCGTGAGC CATGGCAACG ATGCGGGCCT GATTGGCGCG<br>901 GTGTATCATT TTAACAGCT GTATCGCAGC CCGGATGATG ATCGCCAT                                                                                                                                                                                                                                                                                                                                                                                                                                                                                                                                                                                                                                                                                                                                                                                                                                                                                                                                                                                                                                             |
| <b>Protein sequence</b>                                 | 1 MWSHPQFEKA GAENLYFQGM KIAAFDIGGT ALKMGVMARD GRLLTARQS INDSGDRIIL<br>61 QAMLSWLAH PSCEGIAISA PGYIDPHSGL ITMGGAIRRF DNFAMKSWLE TRTGLPVSV<br>121 NDANCVLLAE RWQGKAAEMA NFLVLTIGT IGGAIFCQHQ LINGARFRAG EFGYMLTDRP<br>181 GGRDPRRYSM NENCTLRVLR HRYAQHIGAP LDSVTGELIF DRYDAGDPVC QRLVAEFFNG<br>241 LGHGLYNLVH IFDPQITIFG GGVVERPGFL TLLRQLHAWF GIADYLDTVS HGNDAGLIGA<br>301 VYHFNQLYRS PDDDRH                                                                                                                                                                                                                                                                                                                                                                                                                                                                                                                                                                                                                                                                                                                                                                                                                                                                                                                                                                                                                                                                                                                                                                                                                                                                                                                                                                                                                                                                                                                                                                                                                                                                                                                                                                                                                                    |

| <b><i>At</i>OGE (with Strep-tag and TEV restriction site)</b> |                                                                                                                                                                                                                                                                                                                                                                                                                                                                                                                                                                                                                                                                                                                                                                                                                                                                                                                                                                                                                                                                                                                                                                                                                                                                                                                                                                                                                                                                                                                                                                                                                                                                                                                                                     |
|---------------------------------------------------------------|-----------------------------------------------------------------------------------------------------------------------------------------------------------------------------------------------------------------------------------------------------------------------------------------------------------------------------------------------------------------------------------------------------------------------------------------------------------------------------------------------------------------------------------------------------------------------------------------------------------------------------------------------------------------------------------------------------------------------------------------------------------------------------------------------------------------------------------------------------------------------------------------------------------------------------------------------------------------------------------------------------------------------------------------------------------------------------------------------------------------------------------------------------------------------------------------------------------------------------------------------------------------------------------------------------------------------------------------------------------------------------------------------------------------------------------------------------------------------------------------------------------------------------------------------------------------------------------------------------------------------------------------------------------------------------------------------------------------------------------------------------|
| <b>Nucleotide sequence</b>                                    | 1 ATGTGGAGCC ATCCGCAGTT CGAGAAGGAA AACCTGTATT TTCAGGGCAA GCTTGACGAT<br>61 AGCAAGACCC TGCCGATTGC GGCGCAGATG TATACCCTGC GTAACGCGGG TACCCTGGAG<br>121 GAACAACCTGG CGATCCTGAA CCGTGCGGGC GTGAGCGCGG TTGAGACCGT GGACATGCAG<br>181 AAAGTTAGCG CGAGCGAGCT GAACGCGCTG CTGGAAGAAAG AAAAAATCAA GGTTATTAGC<br>241 AGCCACGTGC CGATCGACAA ACTGCGTGGT AACCTGGATG AGGTTATTAC CGAACAAAAG<br>301 GCGGTGGGCA ACCCGGTGGT TACCGTTCCG TTCCTGAAGC CGGAGGATCG TCCGAAGGAT<br>361 GCGGCGGGTT GGACCGCGTT TGGCAAAGAA CTGGGTGGCT ACGCGGACAA GCTGAGCGCG<br>421 GCGGGTCTGA GCATGGCGTA TCACAACCAC GACTTCGAGA TGGTGAAATT TGATGGCAAG<br>481 ACCGCGCTGG AACTGCTGCT GGATGCGGCG GGTCCGAAAC TGCAAAGCGA ACTGGATGTT<br>541 GCGTGGGTGG CGCGTAGCGG TAACGATCCG GCGGAATTCC TGGGTACCCT GAACGCGCGT<br>601 GTGTTTGC GA TTATGCGAA GGACAACGCG CCGGCGGGTA CCGCGGAGAA CGAACGTGGC<br>661 TTCGCGACCA TCGGTACCGG CGTTCTGGAT TGGAAAACCA TCTGCGCGG GCGCAAGCAT<br>721 GCGGGTGCGC AGTGGTTTCT CTTGGAGCAC GACCTGCCGC TGGATGCGGA AGCGGTGGTT<br>781 ACCAAGGGCA ACGCGTTTCT GAGCGAACCT CTGCCGACCA TTCAATAA                                                                                                                                                                                                                                                                                                                                                                                                                                                                                                                                                                                                                                                                                                         |
| <b>Protein sequence</b>                                       | 1 MWSHPQFEKE NLYFQGLDD SKTLPIAAQM YTLRNAGTLE EQLAILNRAG VSAVETVDMQ<br>61 KVSASELNAL LEKHKIKVIS SHVPIDKLRL NLDEVITEQK AVGNPVVTV FLKPEDRPKD<br>121 AAGWTAFGKE LGGYADKLSA AGLSMAYHNH DFEMVKFDGK TALELLLDAA GPKLQSELDV<br>241 AWVARSNDP AEFLGTLNGR VFAlHAKDNA PAGTAENERG FATIGTGVLD WKTILPAAKH<br>241 AGAQWFILEH DLPLDAEAVV TKGNAFLSER LPTIQ                                                                                                                                                                                                                                                                                                                                                                                                                                                                                                                                                                                                                                                                                                                                                                                                                                                                                                                                                                                                                                                                                                                                                                                                                                                                                                                                                                                                            |
| <b><i>Gl</i>vA (with Strep-tag and TEV restriction site)</b>  |                                                                                                                                                                                                                                                                                                                                                                                                                                                                                                                                                                                                                                                                                                                                                                                                                                                                                                                                                                                                                                                                                                                                                                                                                                                                                                                                                                                                                                                                                                                                                                                                                                                                                                                                                     |
| <b>Nucleotide sequence</b>                                    | 1 ATGTGGAGCC ACCCCAGTT CGAGAAGGCC GGCGCCATGA AGAAAAATC GTTCTCAATC<br>61 GTAATAGCGG GCGGAGGGAG CACTTCACT CCAGGGATCG TACTCATGCT CTTGGACCAT<br>121 TTGGAGGAGT TTCCGATCAG AAAGCTGAAG CTGTATGATA ATGATAAGGA GAGACAGGAT<br>181 CGAATTGCAG GCGCCTGTGA CGTTTTATC AGAGAAAAAG CGCCGGATAT TGAATTTGCA<br>241 GCGACGACTG ACCCGGAAGA AGCTTTTACA GATGTGCGATT TTGTTATGGC GCACATCAGA<br>301 GTAGGGAAAT ACGCGATGCG TCGCTTGAT GAGCAAATTC CGTTAAAGTA CGGAGTTGTC<br>361 GGCCAGGAGA CGTGCGGGCC GGGCGGGATC GCATACGGTA TCGTTCGAT CGGCGGTGTG<br>421 CTTGAAATAT TAGATTACAT GGAAAAATAC TCGCCTGATG CGTGGATGCT CAATTATTCC<br>481 AATCCGGCGG CAATTGTGGC TGAAGTACG AGACGCCTTA GACCGAATTC TAAAAATTCTC<br>541 AATATCTGTG ATATGCCGGT TGGATCGAA GACCGGATGG CGCAAATTC TGGCTTATCC<br>601 TCAAGAAAAAG AAATGAAGGT CCGCTATTAC GGATTAAATC ACTTCGGCTG GTGGACATCA<br>661 ATTCAGGATC AAGAGGGCAA CGATTTAATG CCGAAGCTGA AGGAGCATGT ATCTCAATAC<br>721 GGCTATATTC CGAAAAACAGA GGCTGAAGCG GTGGAGGCGA GCTGGAATGA CACATTCGCC<br>781 AAAGCGCGTG ACGTGCAGGC CGCAGATCCT GATACACTGC CGAATACGTA TTTGCAATAT<br>841 TATTTGTTCC CGGATGATAT GGTGAAAAA TCAAATCCGA ATCATACGCG GGCAAATGAA<br>901 GTGATGGAAG GCGCGAAGC TTTTATTTT AGCCAATGTG ACATGATTAC ACGTGAGCAG<br>961 TCCACAGAAA ACAGCGAAAT CAAAATCGAT GACCACGCAT CATATATCGT TGATCTTGCC<br>1021 CGGGCGATTG CCTACAACAC AGGTGAAAGA ATGCTGTTGA TCGTTGAAAA TAACGGCGCA<br>1081 ATTGCGAACT TTGACCCGAC TCGATGGTC GAGGTGCCAT GCATTGTCGG CTCAAATGGG<br>1141 CCTGAACCGA TTACCGTCGG CACCATTCCG CAATTCCAAA AAGGGCTTAT GGAGCAGCAG<br>1201 GTATCCGTTG AGAAGCTGAC TGTTGAAGCG TGGACGGAGA AATCGTTCCA AAAGCTGTGG<br>1261 CAGGCGCTAA TTTTGTCAA AACAGTGCCG AACGCGCGTG TGGCAAGACT CATTCTTGAG<br>1321 GATTTAATGG AGGCCAACAA AGACTTCTGG CTTGAGCTTG ATCAAAGCCC GACCCGTATA<br>1381 TCATAA |
| <b>Protein sequence</b>                                       | 1 MWSHPQFEKA GAMKKKSFSI VIAGGGSTFT PGIVLMLLDH LEEFPIRKLK LYDNDKERQD<br>61 RIAGACDVFI REKAPDIEFA ATTDPEEAF DVDFVMAHIR VGKYAMRALD EQPLKYGVV<br>121 GQETCGPGGI AYGMRSIGGV LEILDYMEKY SPDWMLNYS NPAAIVAEAT RRLRPNSKIL<br>181 NICDMPVGIE DRMAQILGLS SRKEMKVRY YGLNHFGWWS IQDQEGNDLM PKLKEHVSQY<br>241 GYIPKTEAEA VEASWNTFA KARDVQAADP DTLPNLYLQY YLFPDDMVKK SNPNHTRANE<br>301 VMEGREAFIF SQCDMITREQ STENSEIKID DHAHYIVDLA RAIAYNTGER MLLIVENNGA<br>361 IANFDPTAMV EVPCIVGSNG PEPITVG TIP QFQKGLMEQQ VSVEKLTV EA WTEKSFQKLW<br>421 QALILSKTVP NARVARLILE DLMEANKDFW PELDQSPTRI S                                                                                                                                                                                                                                                                                                                                                                                                                                                                                                                                                                                                                                                                                                                                                                                                                                                                                                                                                                                                                                                                                                                                                                          |

| <b>BglT (with Strep-tag and TEV restriction site)</b>  |                                                                                                                                                                                                                                                                                                                                                                                                                                                                                                                                                                                                                                                                                                                                                                                                                                                                                                                                                                                                                                                                                                                                                                                                                                                                                                                                                                                                                                                                                                                                                                                                                      |
|--------------------------------------------------------|----------------------------------------------------------------------------------------------------------------------------------------------------------------------------------------------------------------------------------------------------------------------------------------------------------------------------------------------------------------------------------------------------------------------------------------------------------------------------------------------------------------------------------------------------------------------------------------------------------------------------------------------------------------------------------------------------------------------------------------------------------------------------------------------------------------------------------------------------------------------------------------------------------------------------------------------------------------------------------------------------------------------------------------------------------------------------------------------------------------------------------------------------------------------------------------------------------------------------------------------------------------------------------------------------------------------------------------------------------------------------------------------------------------------------------------------------------------------------------------------------------------------------------------------------------------------------------------------------------------------|
| <b>Nucleotide sequence</b>                             | 1 ATGTGGAGCC ACCCCAGTT CGAGAAGGCC GCGCCATGC GCATTGCGGT GATTGGCGGC<br>61 GGCAGCAGCT ATACCCCGGA ACTGGTGA AAA GGCCTGCTGG ATATTAGCGA AGATGTGCGC<br>121 ATTGATGAAG TGATTTTTTA TGATATTGAT GAAGAAAAAC AGAAAAATTGT GGTGGATTTT<br>181 GTGAAACGCC TGGTGAAAGA TCGCTTTAAA GTGCTGATTA GCGATACCTT TGAAGGCGCG<br>241 GTGGTGGATG CGAAATATGT GATTTTTCAG TTTCGCCCGG GCGGCTGAA AGGCCGCGAA<br>301 AACGATGAAG GCATTCCGCT GAAATATGGC CTGATTGGCC AGGAAACCAC CGGCGTGGGG<br>361 GGCTTTAGCG CGGCGCTGCG CGCGTTTCCG ATTGTGGAAG AATATGTGGA TACCGTGCGC<br>421 AAAACCAGCA ACGCGACCAT TGTGAACTTT ACCAACCCGA GCGGCCATAT TACCGAATTT<br>481 GTGCGCAACT ATCTGGAATA TGA AAAATTT ATTGGCCTGT GCAACGTGCC GATTAACCTT<br>541 ATTCGCGAAA TTGCGGAAAT GTTAGCGCG CGCTGGAAG ATGTGTTTCT GAAATATTAT<br>601 GGCCTGAACC ATCTGAGCTT TATTGAAAA GTGTTTGTGA AAGGCGAAGA TGTGACCGAA<br>661 AAAGTGTGTTG AAAACCTGAA ACTGAACTG AGCAACATTC CGGATGAAGA TTTCCGACC<br>721 TGGTTTTATG ATAGCGTGCG CCTGATTGTG AACCCGTATC TGCCTATTA TCTGATGGAA<br>781 AAAAAAATGT TAAAAAAT TAGCACCAT GAACTGCGCG CGCGCGAAGT GATGAAAAAT<br>841 GAAAAAGAAC TGTTTAAAA ATATCGCACC GCGGTGGA AAA TTCCGGAAGA ACTGACCAAA<br>901 CGCGCGCGCA GCATGTATAG CACCGCGCGC GCGCATCTGA TTCGCGATCT GAAACCGCAT<br>961 GAAGGCAAAA TTCATATTGT GAACACCCGC AACACCGCA GCATTGAAAA CCTGCCGGAT<br>1021 GATTATGTC TGGAAATTCC GTGCTATGTG CGCAGCGGCC CGTGCCAG CCGTGGCCAG<br>1081 GGCAAAGGCG ATCATTTTGC GCTGAGCTTT ATTCATGCGG TGA AAATGTA TGAACGCCTG<br>1141 ACCATTGAAG CGTATCTGAA ACGCAGCAAA AAACCTGGCG TGAAGCGCT GCTGAGCCAT<br>1201 CCGTGGGCC CGGATGTGGA AGATGCGAAA GATCTGCTGG AAGAAATTCT GGAAGCGAAC<br>1261 CGCGAATATG TGA AACTGGG CTAAC |
| <b>Protein sequence</b>                                | 1 MWSHPQFEKA GAMRIAVIGG GSSYPPELVK GLLDISEDVR IDEVIFYDID EEKQKIVVDF<br>61 VKRLVKDRFK VLISDTFEGA VVDAKYVIFQ FRPGGLKGRE NDEGIPLKYG LIQQUETGVG<br>121 GFSAALRAFP IVEEYVDTVR KTSNATVNF TNPSGHITF VRNYLEYEKF IGLCNVPINF<br>181 IREIAEMFSA RLEDVFLKYY GLNHLSEFK VFKGEDVTE KVFENLKLK SNIPDEDFPT<br>241 WFYDSVRLIV NPYLRYLME KKMFKKISTH ELRAREVMKI EKELFEKYRT AVEIPEELTK<br>301 RGGSMYSTAA AHLIRDLETD EGKIHVNTR NNGSIENLPD DYVLEIPCYY RSGRVHTLSQ<br>361 KGKGDHFLSF IHAVKMYERL TIEAYLKRSK KLALKALLSH PLGPDVEDAK DLLEEILEAN<br>421 REYVKLG                                                                                                                                                                                                                                                                                                                                                                                                                                                                                                                                                                                                                                                                                                                                                                                                                                                                                                                                                                                                                                                                                     |
| <b>AtHYD (with Strep-tag and TEV restriction site)</b> |                                                                                                                                                                                                                                                                                                                                                                                                                                                                                                                                                                                                                                                                                                                                                                                                                                                                                                                                                                                                                                                                                                                                                                                                                                                                                                                                                                                                                                                                                                                                                                                                                      |
| <b>Nucleotide sequence</b>                             | 1 ATGTGGAGCC ACCCGAGTT CGAGAAGGAA AACCTGTACT TTCAGGGTAT GAAGACCATC<br>61 AAAGGCCCGG CGATTTTCTT GCGCAGTTT GTGGGTGATA AAGCGCCGTT CGACACCCTG<br>121 GATAACCTGG GCCAGTGGGC GCGCAGCCTG GGTACAAGG GCATCCAAGT TCCGACCGAT<br>181 CCGAAACTGT TTGACCTGGA GAAGGCGCGC GCGAGCAAA CGTATTGCGA CGATATCAAG<br>241 GGTGCTCTGG CGGAAACCGG CATCGAGATT ACCGAACTGA GCACCCACAT TCAGGGTCAA<br>301 CTGCTGAGCG TTCACCCGGC GTACGATGAG ATGTTGATG GTTTTGCGCC GCGGAACTG<br>361 CGTGGTCGTC GCGAGGCGCG TCAAGAGTGG GCGGTGAACC AGCTGAAGTG CGCGGCGAAA<br>421 GCGAGCCAAC ACCTGGGTCT GAAGAGCCAT GCGAGCTTCA GCGGTGCGCT GCGGTGGCCG<br>481 TTTATCTATC CGTGCCGCA GCGTCCGGCG GGTCTGGTGG AGATGGCGTT TGCGGAACTG<br>541 GGCAAAACGTT GGACCCCGAT TCTGGATACC TTTGAGGAAA ACGGTGTTGA CCTGTGCTAC<br>601 GAGCTGCACC CGGGTGAAGA CCTGCACGAT GGCATCACCT TCGAGCGTTT TCTGGAAGCG<br>661 ACCGGCAACC ACAGCCGTGC GAACATTCTG TATGACCCGA GCCACTTCGT GCTGCAAGCG<br>721 ATGGACTACC TGGATTTTAT CGACATTTAT CACGAGCGTA TCCGTGCGTT CCACGTTAAG<br>781 GATGCGGAAT TTAACCCGAC CGGTCGTAGC GCGGTGTATG GTGGCTATCA GGTGTGGGT<br>841 GACCGTCCGG GCCGTTTCCG TAGCCTGGGT GATGGCCACG TGGACTTCGG TGCGGTTTTT<br>901 AGCAAGCTGA CCCAATATGA TTTTGAAGGT TGGGCGGTGC TGGAGTGGGA ATGCGCGCTG<br>961 AAACATCCGG AGGATGGTGC GCGTGAAGGC GCGGGCTTCA TTGAGAACCA CATCATTCGT<br>1021 GTTACCGAAC GTGCGTTCGA CGATTTTGC AAAAGCGGTA CCGACGATGC GCGCAACCGT<br>1081 CGTCTGCTGG GCCTGTAA                                                                                                                                                                                                                                     |
| <b>Protein sequence</b>                                | 1 MWSHPQFEKE NLYFQGMKTI KGPAIFLAQF VGDKAPFDL DNLGQWAASL GYKGIQVPTD<br>61 PKLFDLEKAA ASKAYCDDIK GRLAETGIEI TELSTHIQGG LVSVHPAYDE MFDGFAPAEI<br>121 RGRPQARQEW AVNQLKCAK ASQHLGLKSH ASFSGALAWP FIYPWPQRPA GLVEMAFAPAEI<br>181 GKRWTPILDT FEENGVDLCY ELHPGEDLHD GITFERFLEA TGNHSRANIL YDPSHFVLQA<br>241 MDYLDLFDIY HERIRAFHVK DAEFNPTGRS GYVGGYQGWV DRPGRFRSLG DGHVDFGAVF<br>301 SKLTQYDFEG WAVLEWECAL KHPEDGAREG AGFIENHIIR VTERAFDDFA KSGTDDAANR<br>361 RLLGL                                                                                                                                                                                                                                                                                                                                                                                                                                                                                                                                                                                                                                                                                                                                                                                                                                                                                                                                                                                                                                                                                                                                                         |



| <b><i>PuCGE<sup>α</sup></i> (with Strep-tag and TEV restriction site)</b>                  |                                                                                                                                                                                                                                                                                                                                                                                                                                                                                                                                                                                                                                                                                                                                                                                                                                                                                                                                                                                                                                                                                                                                                                                                                                                                                                                                                                                                                                                                                                                                        |
|--------------------------------------------------------------------------------------------|----------------------------------------------------------------------------------------------------------------------------------------------------------------------------------------------------------------------------------------------------------------------------------------------------------------------------------------------------------------------------------------------------------------------------------------------------------------------------------------------------------------------------------------------------------------------------------------------------------------------------------------------------------------------------------------------------------------------------------------------------------------------------------------------------------------------------------------------------------------------------------------------------------------------------------------------------------------------------------------------------------------------------------------------------------------------------------------------------------------------------------------------------------------------------------------------------------------------------------------------------------------------------------------------------------------------------------------------------------------------------------------------------------------------------------------------------------------------------------------------------------------------------------------|
| Nucleotide sequence                                                                        | 1 ATGGGCTGGA GCCATCCGCA GTTCGAGAAG GAAAACCTGT ATTTTCAGGG CAAGCTTATG<br>61 AGCAACGTGA AACTGGGTGT TACCCTGTAT AGCTTCAGCA CCGAGTACTG CCAGGGCAAA<br>121 ATGACCCTGG AAGACTGCAT TCGTACCGCG AAGGAGCTGG GTGCGGCGGG TTTGCAAATC<br>181 GTGGCGACCC AGATGATTCC GAGCTACCCG TATGTTAGCG ACAAATTCTT GGGCGAGCTG<br>241 AAGAGCATTT GCCAATACTA TGATATGGAA CCGGTGTGCT ACGGTGCGAA CTGCGACCGT<br>301 GGTCTGCGTG GCGATCGTAA CCGTACCGGC GACGAAATGG TGGCGATGGC GGTTCGTGAT<br>361 ATCAAGAACG CGCACAAAAT GGGTTGCAAG GTGGTTCGTG AGCAGTGGCT GATGGGCCCC<br>421 GAAAACCTCG CGAAAACCTGG CCGTTTGCG GAGCACTACG GTGTGAAGGT TGGCATCGAG<br>481 GTTCACAACC CGGAAACCCC GATTACCCAA AGCACCAGG ATTATATCGC GGCATTGAC<br>541 AAAAACCGTA GCAAGTACCT GGGCTGATT CCGGACTTCG GTTGCTTTGC GAACAAGCCG<br>601 AACAAAATGA ACTGGGATAA CGCGCTGGCG GATGGTGCGG ATAAGAACT GCTGGAGATG<br>661 GCGCGTGACA TGAAATATGA TAACGTGCCG TACGACGAAG CGGTTAAGCG TCTGACCGCG<br>721 GCGGGTGCGA AGAAAGTGA GCTGACCACC ATGCGTGATA TGTATACCTT CCTGACCTTT<br>781 AAGAAAGACG TTAGCGCGGA ACTGCAGGGT CTGAAAGATA TGATCCCGTA CTGCATTTCAC<br>841 ATGCACGGCA AGTACCACTA TATGTACGAG AACCTGCAAG AAGCGGCGAT CCCGTATGAC<br>901 GATATCATGA AAATTGTGAG CGAGAGCGAC TATGATGGTT ACATCGTTAG CGAATATGAG<br>961 GAATACAACA GCGGCCACAG CATTGAGATG CTGCGTCGTC ACCTGAAGAT GATGCACAAC<br>1021 TTTGTGGATT AA                                                                                                                                                                                                                                   |
| Protein sequence                                                                           | 1 MGWSHPQFEK ENLYFQGKLM SNVKLGVTLY SFSTEYCQ GKMTLED CIRTAKELGAAGFEI<br>61 VATQMIPSY YVSDKFLGEL KSICQYYDME PVCYGANCDR GLRGDRNL TGDEMVA MVRD<br>121 IKNAHKMGCK VVREQWLMGP ENFAKLAPFA EHYGVKVGIE VHNPETPITQ STKDYIAAID<br>181 KTGSKYLGLI PDFGCFANKP NKMNWDNALA DGADKKLLEM ARDMKYDNVP YDEAVKRLTA<br>241 AGAKKVELTT MRDMYTLFTF KKDVSALQGG LKDMIPYCIH MHGKYHYMYE NLQEAAIPYD<br>301 DIMKIVSESD YDGYIVSEYE EYNSGHSIEM LRRHLKMMHN FVD                                                                                                                                                                                                                                                                                                                                                                                                                                                                                                                                                                                                                                                                                                                                                                                                                                                                                                                                                                                                                                                                                                           |
| <b><i>PuCGE<sup>β</sup></i> (with Strep-tag and TEV restriction site)</b>                  |                                                                                                                                                                                                                                                                                                                                                                                                                                                                                                                                                                                                                                                                                                                                                                                                                                                                                                                                                                                                                                                                                                                                                                                                                                                                                                                                                                                                                                                                                                                                        |
| Nucleotide sequence                                                                        | 1 ATGTGGAGCC ATCCGCAGTT CGAGAAGGAA AACCTGTATT TTCAGGGCAG ATCTATGGGT<br>61 CTGGCGCTGC GTCTGAACTT TGTGGACGTG GTTTGCGACG ATAGCCTGAA GAACTTCTGG<br>121 GCGAACGGTA AGAAAATCGG CTACCAGTTT GACGTTCTGC TGAGCTACTA TCGTGGCCAC<br>181 TTCCTGAGCA CCATCGATGA AATTGGTGTG AAGGTTGACG GCGTGGATGT TCCGGCGGAG<br>241 AACATCAGCC TGTGCCTGGA CGGTAAAGAA TATGGCGTGG CGGAGCTGCA CGTATCGGTG<br>301 AACGTGTTCT GGCCGATCAT TGAACCGGCG ACCATTAAGG TGTCCAAC GGGTGGCCTG<br>361 AGCGAGGAAG AGCAGACGTG TGATTTCACC CTGTACTTTC GTAGCCCGTA TATGGCGCTG<br>421 AGCGAAACCG AGTACCAGAG CATTGATAGC TGCGGTAGCA AACGTCTGAA CGTTCAAAAC<br>481 TAA                                                                                                                                                                                                                                                                                                                                                                                                                                                                                                                                                                                                                                                                                                                                                                                                                                                                                                                             |
| Protein sequence                                                                           | 1 MWSHNPQFEK NLYFQGRSMG LALRLNFVDV VCDLSLKNFW ANGKKIGYQF DVRLSYRGRH<br>61 FLSTIDEIGV KVDGVDPAE NISLCLDGKE YGVAELHDLV NVFWPIEPA TIKVFQPGGL<br>121 SEEEHDVDFT LYFRSPYMAL SETEYQSIDS CGSKRLNVQN                                                                                                                                                                                                                                                                                                                                                                                                                                                                                                                                                                                                                                                                                                                                                                                                                                                                                                                                                                                                                                                                                                                                                                                                                                                                                                                                           |
| <b><i>Gfo Oxo</i> from <i>A. tumefaciens</i> (with Strep-tag and TEV restriction site)</b> |                                                                                                                                                                                                                                                                                                                                                                                                                                                                                                                                                                                                                                                                                                                                                                                                                                                                                                                                                                                                                                                                                                                                                                                                                                                                                                                                                                                                                                                                                                                                        |
| Nucleotide sequence                                                                        | 1 ATGTGGAGCC ATCCGCAGTT CGAGAAGGAA AACCTGTATT TTCAGGGCAT GAGCAGCGCG<br>61 ACCGCGCGTT TCAACAGCCG TCGTATCCGT CTGGGTATGG TGGGTGGCGG TCAGGGTGCG<br>121 TTTATCGGCG CGGTTCACCG TATTGCGGCG CGTCTGGACG ATCGTTACGA GCTGGTTGCG<br>181 GGTGCGCTGA GCAGCGACCC GGCGCGTGCG AGCGTTAGCG CGACCCTGCT GGGTATTGCG<br>241 CCGGAACGTA GCTATGCGAG CTTTGAGGAA ATGGCGAGCG CGGAGGCGGG CTGTGAAGAT<br>301 GGCATCGAGG CGGTGGCGAT TGTTACCCG AACCACTGC ACTTTGCGC GAGCAAGTTC<br>361 TTTCTGGAGA GCGGCATCCA CGTGATTTGC GACAAACCGG TTACCGCGAC CCTGGAGGAA<br>421 GCGAAGGAAC TGCGGAAAAT CGTGCGTGCG AGCGATCGTC TGTTCAATTCT GACCCACAAC<br>481 TACACCGGTT ATGCGATGCT GCGTCAAATG CGTGAGATGG TGGCGAACGG TGCGATCGGC<br>541 AAGCTGCGTC ACGTTCAGGC GGAATACGCG CAAGACTGGC TGACCGAGGC GGTTGAAAAG<br>601 ACCGGTGCGA AGGGTGCGGA GTGGCGTACC GACCCGAGCC GTAGCGGTGC GGGCGGTGCG<br>661 ATCGGTGATA TTGGCACCCA CGCGTTCAAC GCGGCGGCGT TTGTGACCGG CGAAATTCGG<br>721 GCGAGCTGTG ACGCGGATCT GACCAGCTTC GTTCCGGGTC GTCAGCTGGA CGATAGCGCG<br>781 AACATCCTGC TGCCTTATGA GAGCGGTGCG AAAGGCATGC TGTGGGCGAG CCAAATTGCG<br>841 GTGGGCAACG AAAACGCGCT GAGCCTGCGT GTTACGGTG ACAAGGGCGG TCTGGAATGG<br>901 CACCACCGTG TGCCGGATGA GCTGTGTTT ACCCCGTATG GCGAACCGAA ACGTCTGATC<br>961 ACCCGTAACG GTGCGGGTGC GGGTGC GGCG GCGAACCGTG TGAGCCGTGT TCCGAGCGGT<br>1021 CACCGGAAG GCTACCTGGA GGGTTTCGCG ACCATTATC GTGAGGCGGC GGACGCGATC<br>1081 ATTGCGAAGC GTGAAGGCAA AGCGGCGGCG GGTGACGTTA TCTATCCGGG TATTAGGAT<br>1141 GGTCTGGCGG GCCTGGCGTT TATTGATGCG GCGGTGCGTA GCAGCCTGAC CAGCAGCTGG<br>1201 GTTGAAATCG ATATTTAA |
| Protein sequence                                                                           | 1 MWSHNPQFEK NLYFQGMSSA TARFNSRRIR LGMVGGGQGA FIGAVHRIAA RLDDRYELVA<br>61 GALSSDARA SVSATLLGIA PERSYASFEE MASAEAGRED GIEAVAIPT NHLHFAPSKF<br>121 FLESGIHVIC DKPVTATLEE AKELAKIVRA SDRLFILTHN YTGAYMLRQM REMVANGAIG<br>181 KLRHVQAEYA QDWL TEAVEK TGAKGAEWRT DPSRSGAGGA IGDIGTHAFN AAASFVTGEIP<br>241 ASLYADLTSF VPGRLDDSA NILLRYESGA KGMLWASQIA VGNNALSRL VYGDKGGLEW<br>301 HHRVPDELWF TPYGEPKRLI TRNGAGAGAA ANRVSRVPSG HPEGYLEGFA TIYREAADAI<br>361 IAKREGKAAA GDVIYPIED GLAGLAFIDA AVRSLSLSSW VEIDI                                                                                                                                                                                                                                                                                                                                                                                                                                                                                                                                                                                                                                                                                                                                                                                                                                                                                                                                                                                                                                  |

**Supplementary Table 7.** Oligonucleotide primers used in this study. Homologous overhangs are in italic.

| <b>Primers used for sub-cloning of <i>Pu</i>CGE</b> |                                               |
|-----------------------------------------------------|-----------------------------------------------|
| DgpB-del1-fwd                                       | <i>GTACACGGCCGGGA</i> ACTATATCCGGATTGGCGAATGG |
| DgpB-del1-rev                                       | CCGGATATAGTTCCCGGCCGTGTACAATACGATTACTTTCTG    |

## Supplementary References

1. Koshland Jr., D. E. Stereochemistry and the mechanism of enzymatic reactions. *Biological Reviews* **28**, 416–436 (1953).
2. Zechel, D. L. & Withers, S. G. Glycosidase mechanisms: anatomy of a finely tuned catalyst. *Acc Chem Res* **33**, 11–8 (2000).
3. Thompson, J. *et al.* The Gene *glvA* of *Bacillus subtilis* 168 encodes a metal-requiring, NAD(H)-dependent 6-phospho- $\alpha$ -glucosidase. *Journal of Biological Chemistry* **273**, 27347–27356 (1998).
4. Rajan, S. S. *et al.* Novel catalytic mechanism of glycoside hydrolysis based on the structure of an NAD<sup>+</sup>/Mn<sup>2+</sup>-dependent phospho- $\alpha$ -glucosidase from *Bacillus subtilis*. *Structure* **12**, 1619–1629 (2004).
5. Yip, V. L. Y., Thompson, J. & Withers, S. G. Mechanism of GlvA from *Bacillus subtilis*: A detailed kinetic analysis of a 6-phospho- $\alpha$ -glucosidase from glycoside hydrolase family 4. *Biochemistry* **46**, 9840–9852 (2007).
6. Sannikova, N. *et al.* Both Chemical and non-chemical steps limit the catalytic efficiency of family 4 glycoside hydrolases. *Biochemistry* **57**, 3378–3386 (2018).
7. Nakamura, K., Zhu, S., Komatsu, K., Hattori, M. & Iwashima, M. Deglycosylation of the Isoflavone C-glycoside puerarin by a combination of two recombinant bacterial enzymes and 3-oxo-glucose. *Appl Environ Microbiol* **86**, e00607-20 (2020).
8. Mori, T. *et al.* C-Glycoside metabolism in the gut and in nature: Identification, characterization, structural analyses and distribution of C-C bond-cleaving enzymes. *Nat Commun* **12**, 6294 (2021).
9. Kim, E. M. *et al.* Identification and characterization of the *Rhizobium* sp. strain GIN611 glycoside oxidoreductase resulting in the deglycosylation of ginsenosides. *Appl Environ Microbiol* **78**, 242–249 (2012).
10. Kuritani, Y. *et al.* Conversion of levoglucosan into glucose by the coordination of four enzymes through oxidation, elimination, hydration, and reduction. *Sci Rep* **10**, 20066 (2020).
11. Thompson, J., Lichtenthaler, F. W., Peters, S. & Pikis, A.  $\beta$ -glucoside kinase (BglK) from *Klebsiella pneumoniae*. Purification, properties, and preparative synthesis of 6-phospho- $\beta$ -D-glucosides. *Journal of Biological Chemistry* **277**, 34310–34321 (2002).
12. Yip, V. L. Y. *et al.* An unusual mechanism of glycoside hydrolysis involving redox and elimination steps by a family 4  $\beta$ -glycosidase from *Thermotoga maritima*. *J Am Chem Soc* **126**, 8354–8355 (2004).
13. Tegl, G. & Nidetzky, B. Leloir glycosyltransferases of natural product C-glycosylation: structure, mechanism and specificity. *Biochem Soc Trans* **48**, 1583–1598 (2020).
14. Tanner, M. E. Mechanistic studies on the indole prenyltransferases. *Nat Prod Rep* **32**, 88–101 (2015).
